# Supplementary material for: A visible-light-induced photocatalyst-free approach for C-3 dicarbonyl coumarin production
Source: Royal Society of Chemistry journal article supplement (doi:10.1039/d1cc02399c), 2021-01-01
Supplement: d1cc02399c1.pdf [file d1cc02399c1.pdf]

*Supporting Information*

*for*

**A Visible-Light-Induced Photocatalyst-Free Approach for C-3  
Dicarbonyl Coumarins Production**

Jinhu Xi, Xinjie Wu, Mengmeng Huang, Jung Keun Kim,\* Jianye Zhang,  
Yabo Li\* and Yangjie Wu

*College of Chemistry, Henan Key Laboratory of Chemical Biology and Organic Chemistry, Key  
Laboratory of Applied Chemistry of Henan Universities, Zhengzhou University, Zhengzhou 450052,  
P.R. China. E-mail: ybli@zzu.edu.cn, kim@zzu.edu.cn*

**Table of contents**

|                                                                                          |     |
|------------------------------------------------------------------------------------------|-----|
| 1. General information .....                                                             | S1  |
| 2. Experimental procedures .....                                                         | S1  |
| 3. Control experiments .....                                                             | S2  |
| 4. H <sub>2</sub> <sup>18</sup> O isotopic labeling experiments .....                    | S5  |
| 5. UV/Vis absorption spectra of 3-arylacetylene coumarin precursors .....                | S8  |
| 6. Fluorescent probe for hydrogen peroxide of <b>2r</b> , <b>2z</b> and <b>2ab</b> ..... | S9  |
| 7. References .....                                                                      | S13 |
| 8. Characterization data .....                                                           | S14 |
| 9. NMR spectra of all compounds .....                                                    | S29 |
| 10. X-ray crystallographic data .....                                                    | S77 |

## 1. General information

All reactions were performed using quartz tube. Solvents were dried by standard methods before they were used. 3-Arylacetylene coumarins and 3-bromocoumarin were synthesized according to the literature.<sup>1,2,3</sup> Commercial grade reagents were used without further purification. H<sub>2</sub><sup>18</sup>O is purchased from Shanghai Yi Shi Chemical Co., purity 97%. Silica gel was purchased from Qing Dao Hai Yang Chemical Industry Co. All reactions were carried out with photoreactor (Serial No: PEA12) which was purchased from LUOYANG JINFENG ELECTROMECHANICAL EQUIPMENT CO., LTD. The LCD Digital Hotplate Magnetic Stirrer MS-H-Pro<sup>+</sup> and Digital Single Channel Adjustable Automatic Electronic Pipette Micropipette dPetee<sup>+</sup> were purchased from Dragon Laboratory Instruments Limited. <sup>1</sup>H NMR and <sup>13</sup>C NMR spectra were recorded on 400 and 100 MHz NMR instruments using CDCl<sub>3</sub> as the solvent and TMS as the internal standard. <sup>19</sup>F NMR spectra was recorded at 376.5 MHz on Bruker DPX-400, the chemical shifts  $\delta$  are reported relative to CFCl<sub>3</sub> ( $\delta$  = 0 ppm) as internal standard. The multiplicity of signals is designated by the following abbreviations: s (singlet), d (doublet), t (triplet), q (quartet), m (multiplet), dd = doublet of doublet. High resolution mass spectra (HRMS) was obtained on an Agilent LC-MSD-Trap-XCT spectrometer with micromass MS software using electrospray ionisation (ESI). The UV/Vis absorption spectra was recorded on a Perkin Elmer Lambda 35 Spectrometer and the fluorescence emission spectra were recorded using a F-4500 FL spectrophotometer. The X-ray single crystal structure was determined by the Oxford Diffraction Xcalibur CCD single crystal diffractometer. The illuminance of LED light was tested by the ZDS-10 digital luxmeter from Suzhou Tianwei Instrument Co., Ltd.

## 2. Experimental procedures

### 2.1 General procedure for synthesis of 3-arylacetylene coumarins from alkyne esters<sup>1</sup>

To a reaction tube equipped with a magnetic stirring bar were added phenyl 3-phenylpropiolate (0.2 mmol), NIS (2 equiv.), MeCN (1.5 mL) stirred under 3 W blue LED ( $E = 5.00-5.15 \times 10^4$  lx,  $\lambda_{\max} = 450-465$  nm) under air atmosphere and at room temperature for 24 hours. Then Pd(PPh<sub>3</sub>)<sub>2</sub>Cl<sub>2</sub> (0.0144 g, 10 mol%), CuI (0.0039 g, 10 mol%), phenylacetylene (3 equiv.) and Et<sub>3</sub>N (0.5 mL) were added. The obtained reaction mixture was heated at 60 °C for 12 hours under Ar atmosphere. The solvent

was removed under vacuum, and the residue was purified by flash chromatography on silica gel (eluent: petroleum ether/dichloromethane = 6:1/3:1, v/v) to give the desired compound **1**.

## 2.2 General procedure for the synthesis of 3-arylacetylene coumarins from 3-bromocoumarins<sup>2,3</sup>

To a reaction tube equipped with a magnetic stirring bar were added 3-bromocoumarin (0.2 mmol), Pd(PPh<sub>3</sub>)<sub>2</sub>Cl<sub>2</sub> (0.0144 g, 10 mol%), CuI (0.0039 g, 10 mol%), phenylacetylene (3 equiv.) and Et<sub>3</sub>N (0.5 mL) were added. The obtained reaction mixture was heated at 60 °C for 12 hours under Ar atmosphere. The solvent was removed under vacuum, and the residue was purified by flash chromatography on silica gel (eluent: petroleum ether/dichloromethane = 6:1/3:1, v/v) to give the desired compound **1**.

## 2.3 General procedure for the synthesis of C-3 dicarbonyl coumarins **2**

To a reaction tube equipped with a magnetic stirring bar were added 3-arylacetylene coumarins (0.2 mmol), I<sub>2</sub> (2 equiv.), NaHCO<sub>3</sub> (3equiv.), DCE:H<sub>2</sub>O (2 mL, v/v = 200:3) stirred under 3 W blue LED (E = 5.00-5.15X10<sup>4</sup> lx, λ<sub>max</sub> = 450-465 nm) under oxygen atmosphere and at room temperature for 24 hours. The solvent was removed under vacuum, and the residue was purified by flash chromatography on silica gel (eluent: petroleum ether/ethyl acetate/dichloromethane = 30:1:1/10:1:1, v/v) to give the desired compound **2**.

## 3. Control experiments

In order to explore the possible mechanism of the present transformation, a series of control experiments were carried out (Scheme S2, exp 1-6). [2,2,6,6-tetramethylpiperidine]-1-oxyl (TEMPO) or butylated hydroxytoluene (BHT), a radical-trapping reagent was added into the reaction. When added 3-arylacetylene coumarin (0.2 mmol), I<sub>2</sub> (2 equiv.), NaHCO<sub>3</sub> (3 equiv.), TEMPO (126.3 mg, 0.8 mmol) (exp 1) or BHT (176.3 mg, 0.8 mmol) (exp 2) DCE:H<sub>2</sub>O (2 mL, v/v = 200:3) stirred under 3 W blue LED (E = 5.00-5.15X10<sup>4</sup> lx, λ<sub>max</sub> = 450-465 nm) under oxygen atmosphere and at room temperature for 24 hours. The oxidation reaction was not completely inhibited. Meanwhile, five strong molecular ion peaks were obtained by ESI-MS and attributed to [I+H]<sup>+</sup> (exact mass: 590.9314), [I+H]<sup>+</sup> (exact mass: 590.9316), [II+H]<sup>+</sup> (exact mass: 369.1122), [III+H]<sup>+</sup> (exact mass: 158.1536) and [IV+H]<sup>+</sup> or [IV'+H]<sup>+</sup> (exact mass: 573.3001) (Fig. S1-S5).

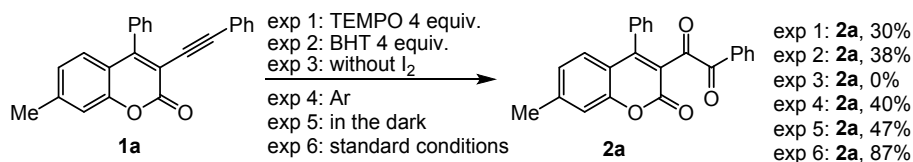

**Scheme S2.** Control experiments

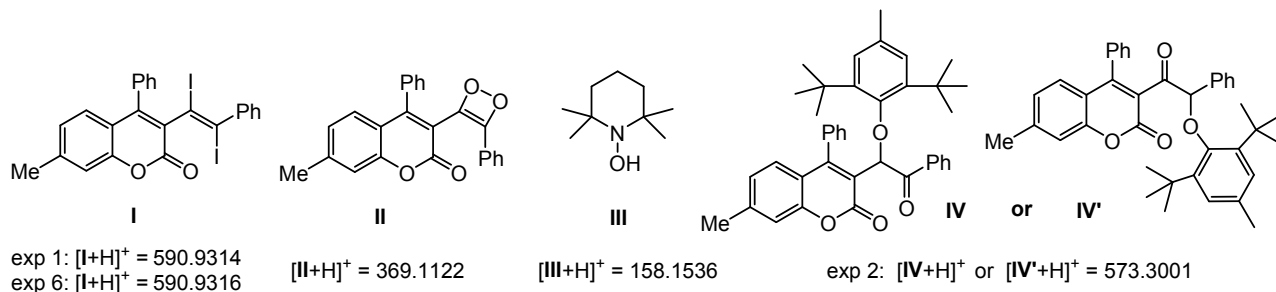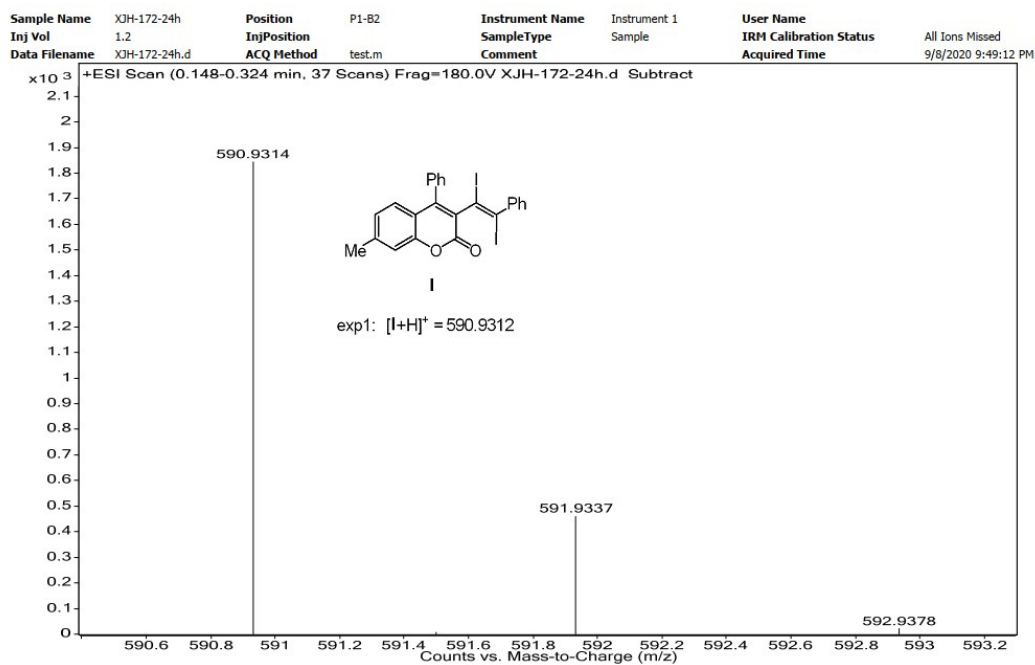

**Figure S1.** HRMS spectrum of compound [I+H]<sup>+</sup> for exp 1

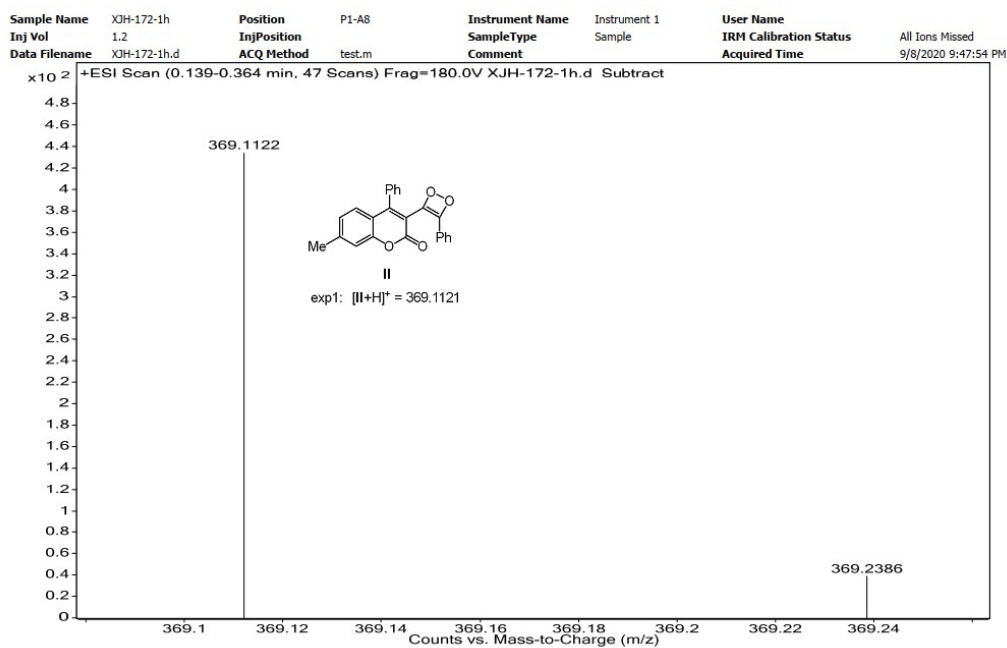

Figure S2. HRMS spectrum of compound  $[II+H]^+$  for exp 1

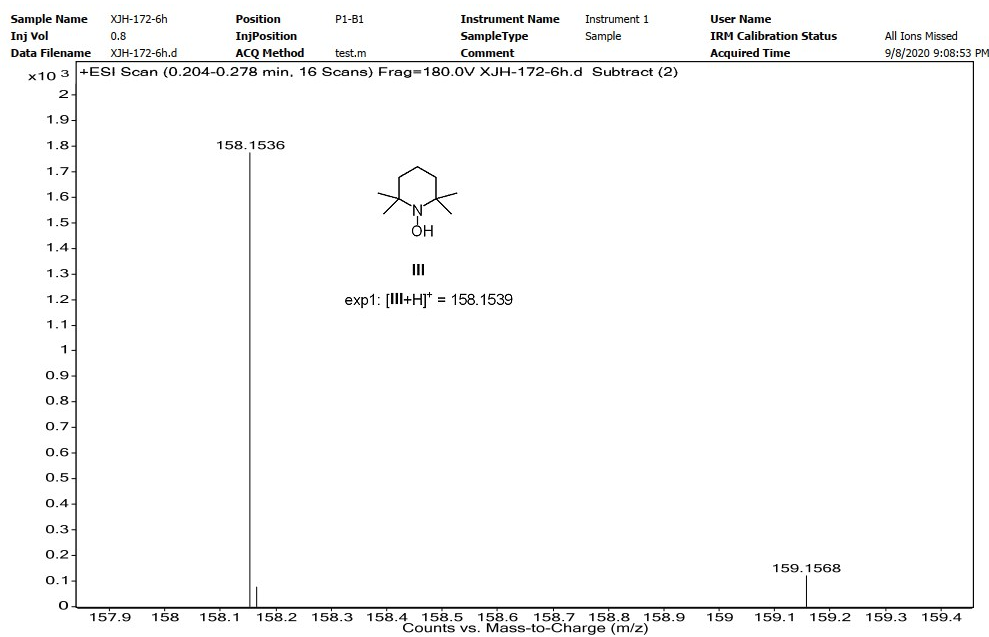

Figure S3. HRMS spectrum of compound  $[III+H]^+$  for exp 1

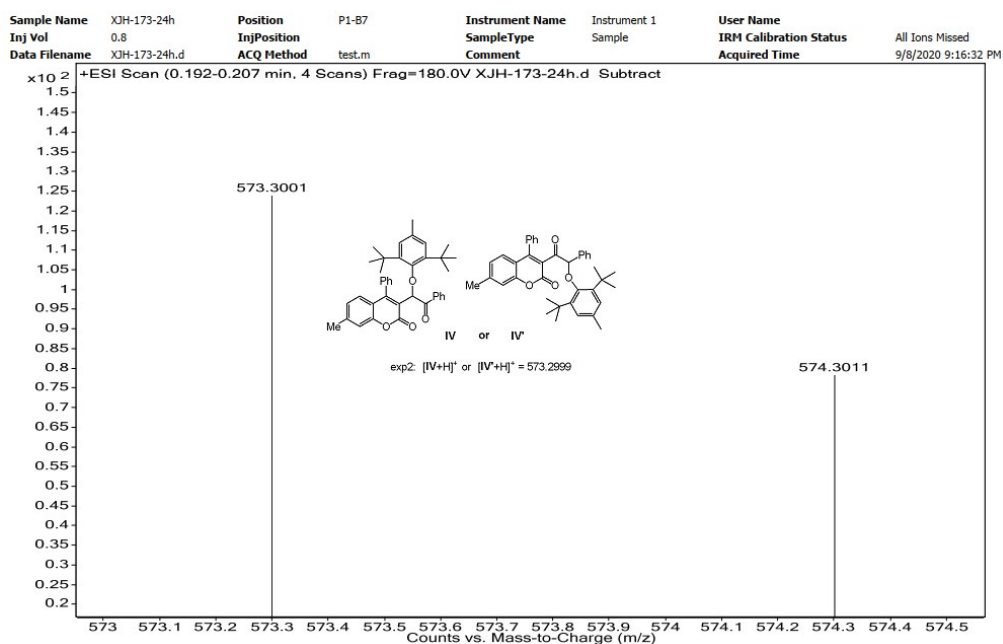

**Figure S4.** HRMS spectrum of compound  $[IV/IV'+H]^+$  for exp 2

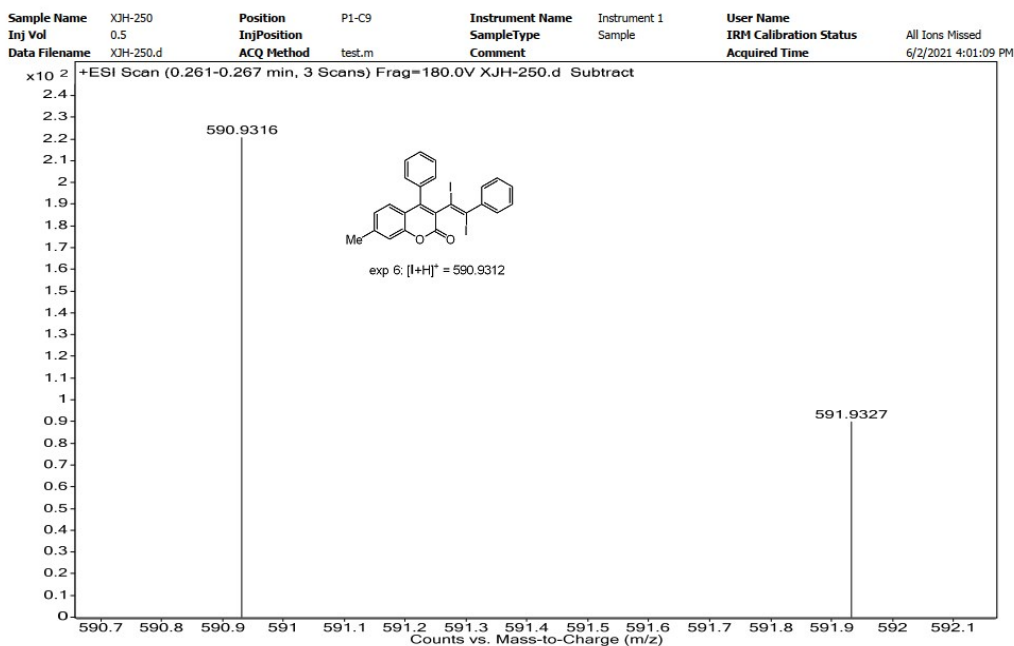

**Figure S5.** HRMS spectrum of compound  $[I+H]^+$  for exp 6

## 4. $H_2^{18}O$ isotopic labeling experiments

3-Arylacetylene coumarin (**1a**, 67.9 mg, 0.2 mmol),  $I_2$  (104.7 mg, 2 equiv.),  $NaHCO_3$  (50.4 mg, 3 equiv.),  $DCE:H_2^{18}O$  (2 mL, v/v = 200:3) stirred under 3 W blue LED ( $E = 5.00-5.15 \times 10^4$  lx,  $\lambda_{max} = 450-465$  nm) under argon atmosphere and at room temperature for 24 hours. After the reaction was

complete, the reaction mixture was concentrated under reduced pressure, and the crude product was purified by silica gel column chromatography and preparative TLC to afford the corresponding product, which was measured HRMS (Fig. S6).

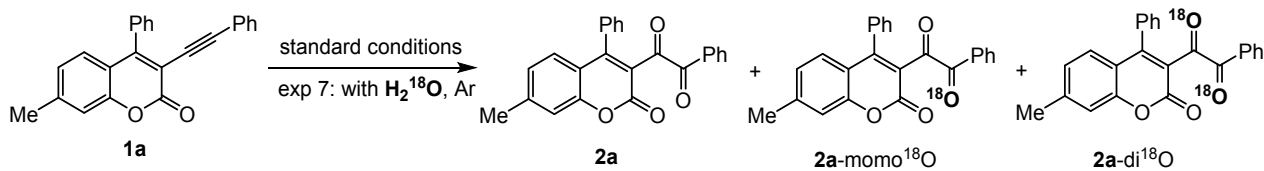

exp 7: **2a** : **2a-mono**<sup>18</sup>O : **2a-di**<sup>18</sup>O = 27% : 43% : 30% (total conversion: 40%)

**Scheme S3.** H<sub>2</sub><sup>18</sup>O isotopic labeling experiments under argon

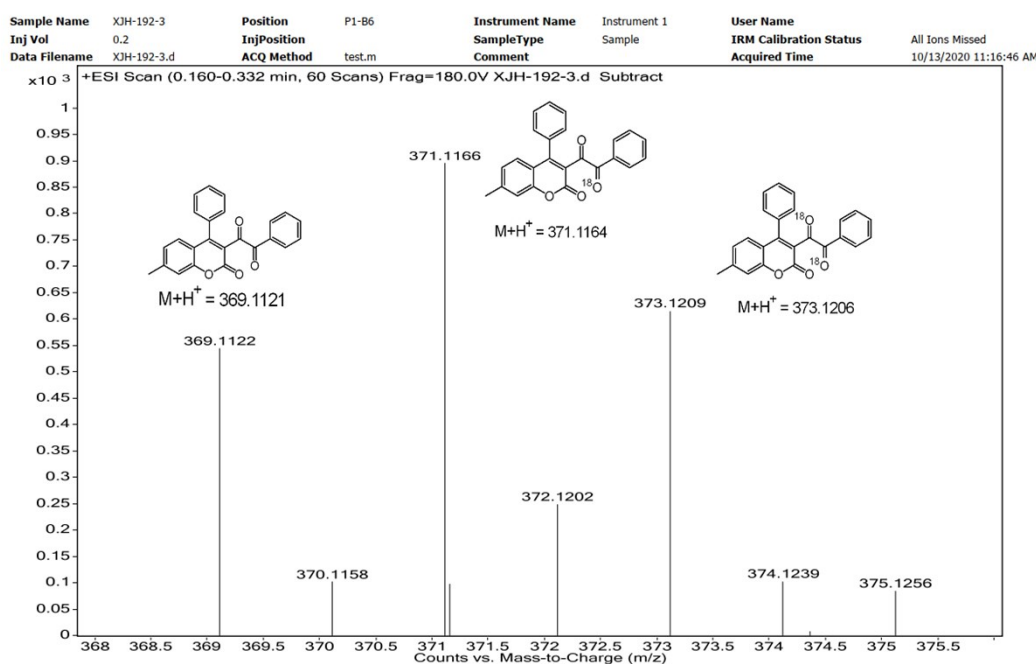

**Figure S6.** HRMS spectrum of compound  $[\mathbf{2a}/\mathbf{2a-mono}^{18}\text{O}/\mathbf{2a-di}^{18}\text{O}+\text{H}]^+$  for exp 7

3-Arylacetylene coumarin (**1a**, 67.9 mg, 0.2 mmol), I<sub>2</sub> (104.7 mg, 2 equiv.), NaHCO<sub>3</sub> (50.4 mg, 3 equiv.), DCE:H<sub>2</sub><sup>18</sup>O (2 mL, v/v = 200:3) stirred under 3 W blue LED (E = 5.00-5.15X10<sup>4</sup> lx, λ<sub>max</sub> = 450-465 nm) under oxygen atmosphere and at room temperature for 24 hours. After the reaction was complete, the reaction mixture was concentrated under reduced pressure, and the crude product was purified by silica gel column chromatography and preparative TLC to afford the corresponding product, which was measured HRMS (Fig. S7-S8).

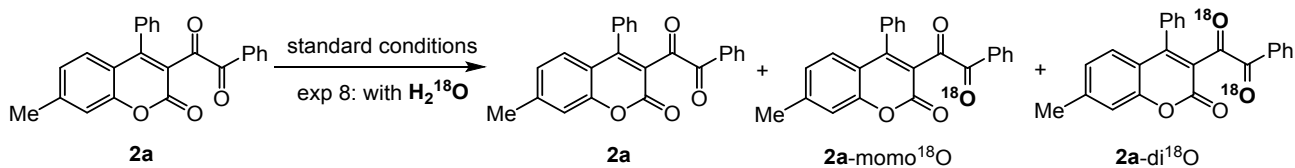

exp 8: **2a** : **2a-mono**<sup>18</sup>O : **2a-di**<sup>18</sup>O = 94% : 6% : 0% (total conversion: 95%)

### Scheme S4. H<sub>2</sub><sup>18</sup>O isotopic labeling experiments

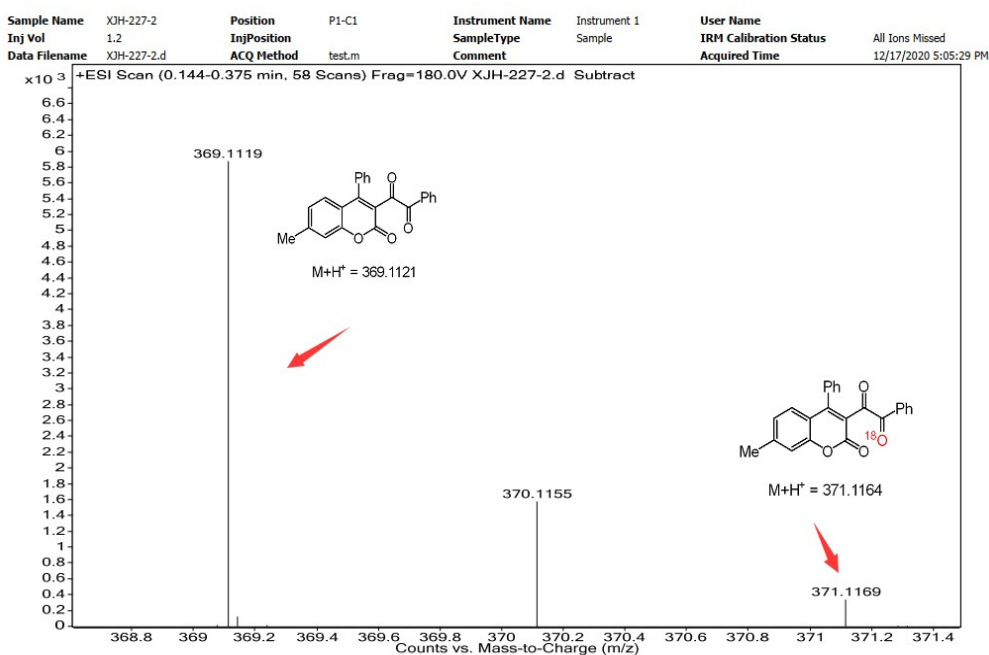

Figure S7. HRMS spectrum of compound [**2a/2a-mono**<sup>18</sup>O+H]<sup>+</sup> for exp 8

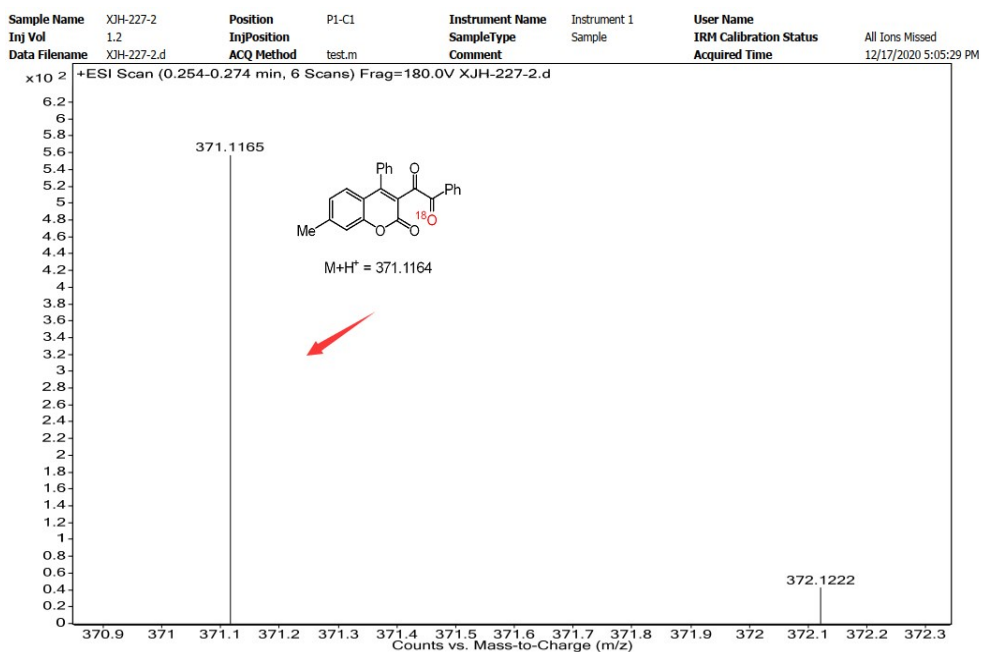

Figure S8. HRMS spectrum of compound [**2a-mono**<sup>18</sup>O+H]<sup>+</sup> for exp 8



## 5. UV/Vis absorption spectra of 3-arylacetylene coumarin precursors.

The UV/Vis absorption spectra was recorded in MeCN of a 0.05 mM solution in 10 mm path length quartz cuvette on a Perkin Elmer Lambda 35 Spectrometer.

**Table S1.** UV/Vis absorption spectra of 3-arylacetylene coumarin precursors in acetonitrile solutions.

| Compounds  | $\lambda_{\text{max}}$ (nm) |
|------------|-----------------------------|
| <b>1p</b>  | 356                         |
| <b>1q</b>  | 347                         |
| <b>1r</b>  | 423                         |
| <b>1s</b>  | 343                         |
| <b>1t</b>  | 346                         |
| <b>1u</b>  | 354                         |
| <b>1v</b>  | 342                         |
| <b>1w</b>  | 351                         |
| <b>1x</b>  | 342                         |
| <b>1y</b>  | 422                         |
| <b>1z</b>  | 422                         |
| <b>1aa</b> | 423                         |
| <b>1ab</b> | 424                         |

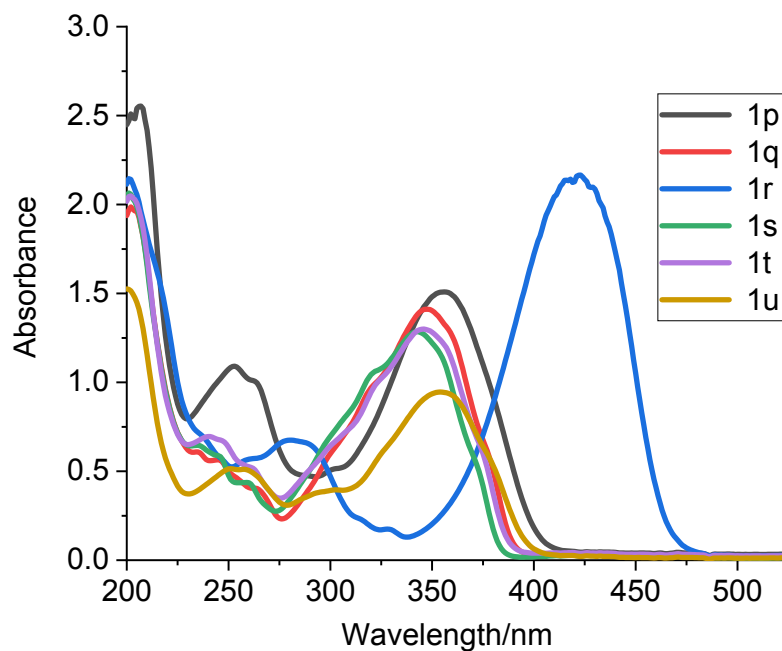

**Figure S9.** Absorption spectra of **1p-1u** in MeCN

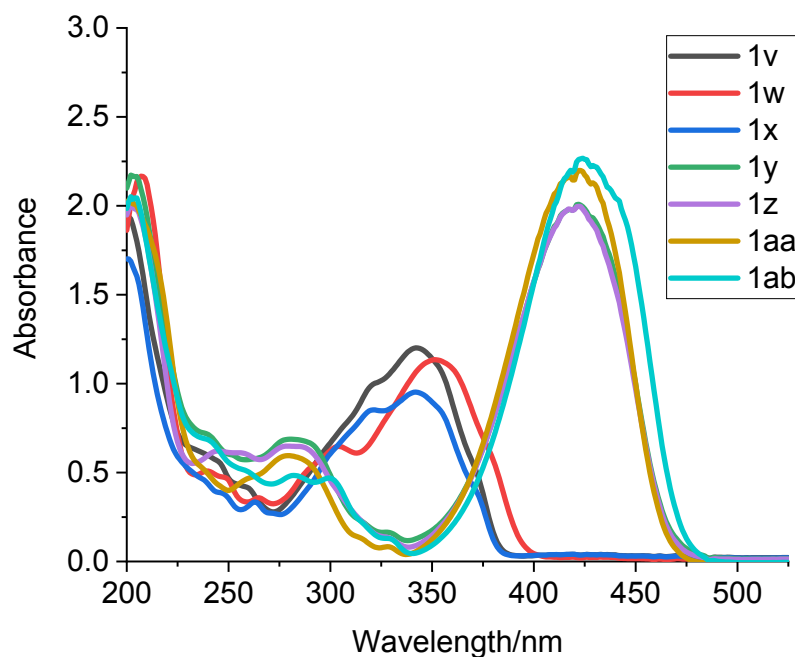

**Figure S10.** Absorption spectra of **1v-1ab** in MeCN

## 6. Fluorescent probe for hydrogen peroxide of **2r**, **2z** and **2ab**

Probes **2r**, **2z**, **2ab** were dissolved in DMF for a stock solution (1 mM).  $\text{H}_2\text{O}_2$  was from dilution of 30% solution in water. Test solutions (10  $\mu\text{M}$ ) were prepared by displacing 30  $\mu\text{L}$  of the stock solution into a 3 mL mixture of 0.01 M PBS and  $\text{CH}_3\text{CN}$  (8:2, v/v) at pH 7.4.<sup>4</sup> The detection limit was calculated based on the fluorescence titration. Detection limit =  $3\sigma/k$ . Where  $\sigma$  is the standard deviation of blank measurement,  $k$  is the slope between the fluorescence intensity ratio versus  $\text{H}_2\text{O}_2$  concentration.

### 6.1 Fluorescent probe for hydrogen peroxide of **2r**

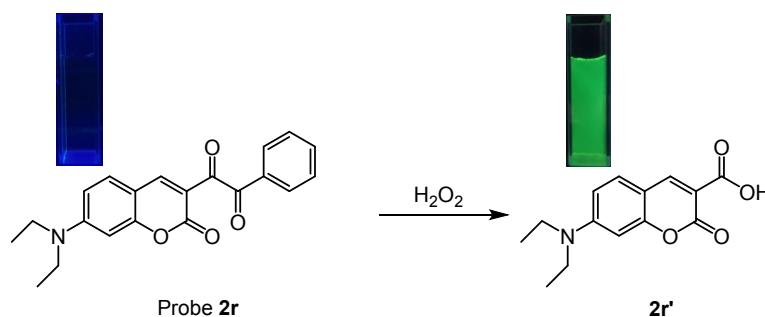

**Scheme S5.** Fluorescent probe for hydrogen peroxide of **2r**

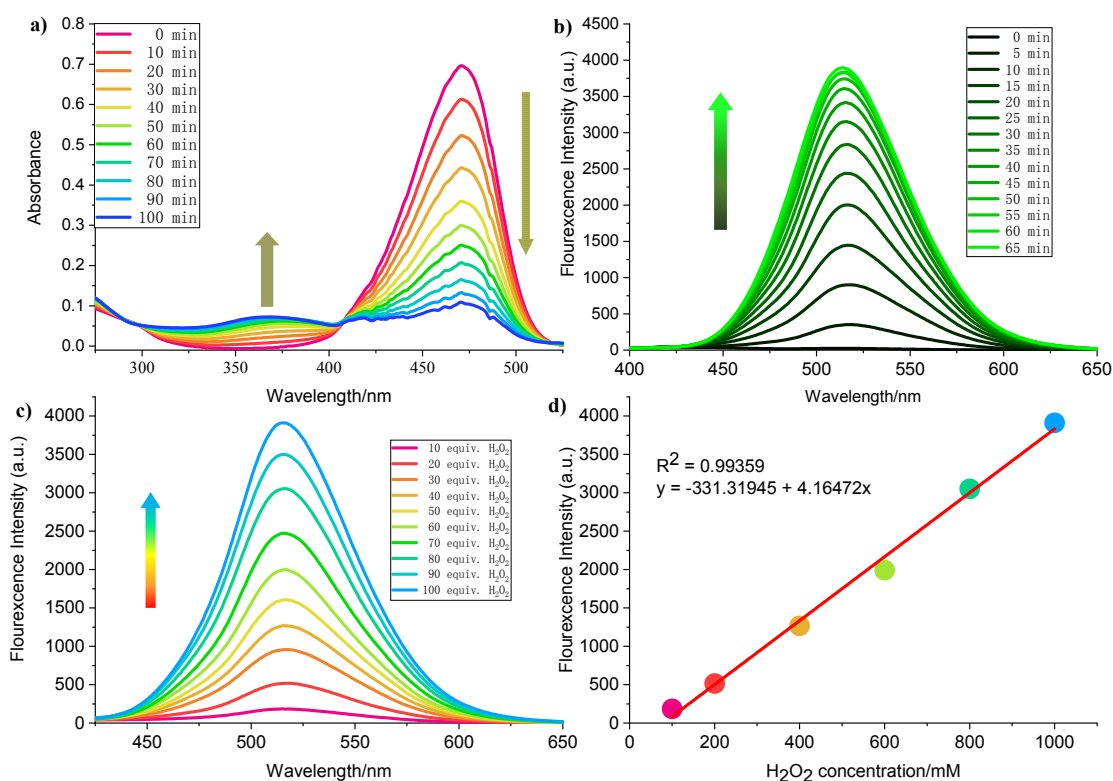

**Figure S11.** (a) Changes in the absorption spectra of compound **2r** in the presence of 100 equiv. of  $\text{H}_2\text{O}_2$ . (b) Time-dependent fluorescence spectral changes of compound **2r** with 100 equiv. of  $\text{H}_2\text{O}_2$  ( $\lambda_{\text{ex}} = 360 \text{ nm}$ , steady excitation). (c, d) Fluorescent emission spectra of compound **2r** (10  $\mu\text{M}$ ) in the presence of 10-100 equiv. of  $\text{H}_2\text{O}_2$  (Data were acquired at 515 nm)

The fluorescence emission spectrum of probe **2r** was measured by 15 times and  $\sigma$  (the standard deviation of blank measurement) was achieved. The data were acquired at 515 nm ( $n = 15$ ), and  $\sigma$  was 0.344621 by calculation. The  $k$  was 4.16472. Detection limit =  $3\sigma/k = 0.2482 \mu\text{M}$ .

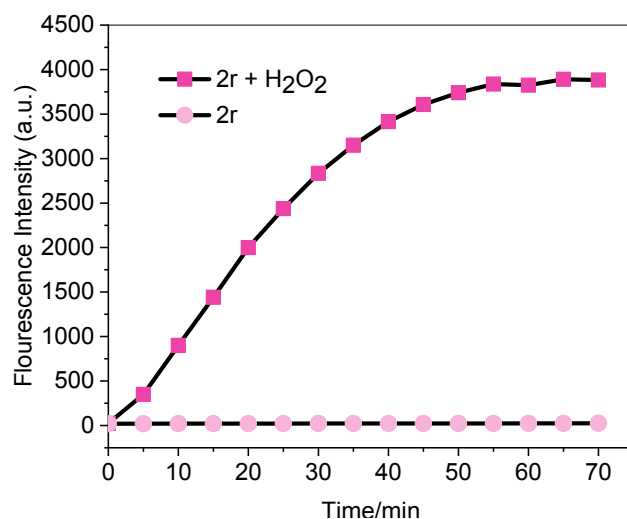

**Figure S12.** Intensity changes of **2r** in fluorescence at 515 nm ( $\lambda_{\text{ex}} = 360 \text{ nm}$ ) over time with or without  $\text{H}_2\text{O}_2$

## 6.2 Fluorescent probe for hydrogen peroxide of **2z**

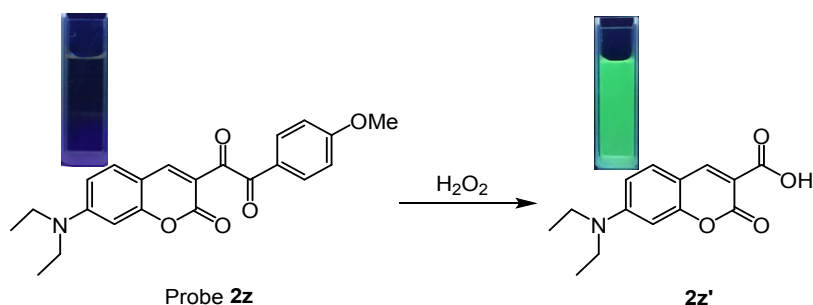

Scheme S6. Fluorescent probe for hydrogen peroxide of **2z**

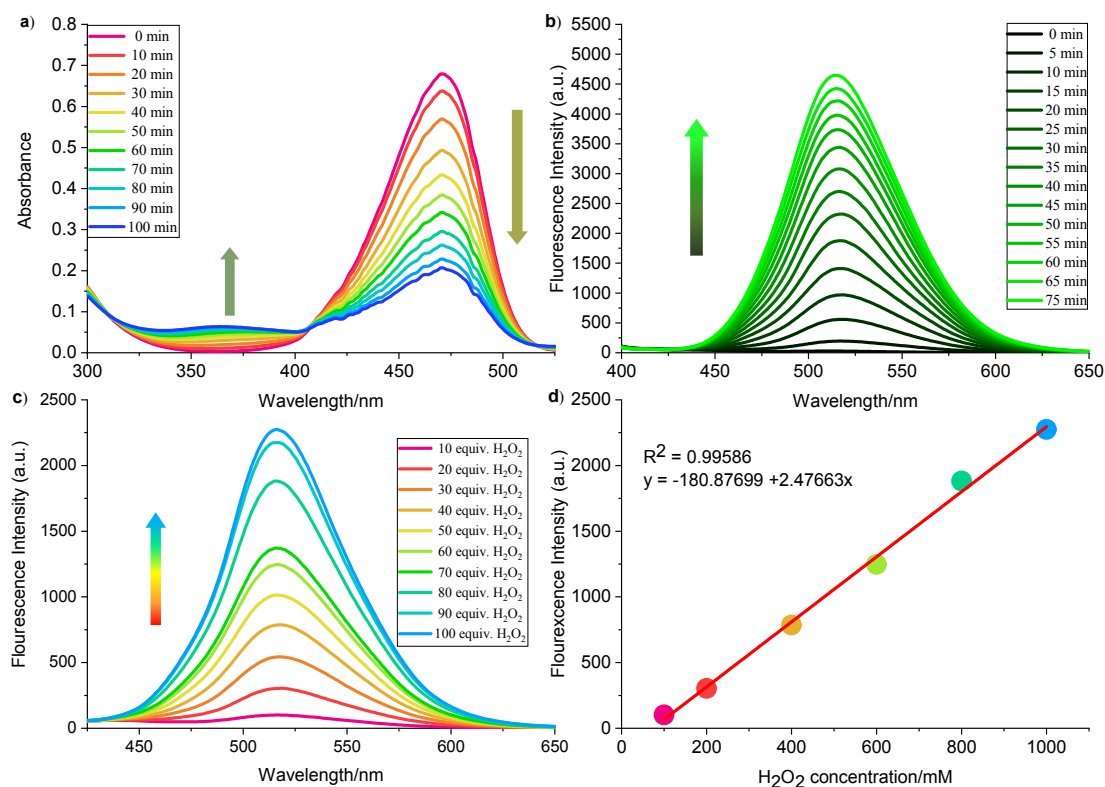

**Figure S13.** (a) Changes in the absorption spectra of compound **2z** in the presence of 100 equiv. of  $\text{H}_2\text{O}_2$ . (b) Time-dependent fluorescence spectral changes of compound **2z** with 100 equiv. of  $\text{H}_2\text{O}_2$  ( $\lambda_{\text{ex}} = 360$  nm, steady excitation). (c, d) Fluorescent emission spectra of compound **2z** (10  $\mu\text{M}$ ) in the presence of 10-100 equiv. of  $\text{H}_2\text{O}_2$  (Data were acquired at 516 nm)

The fluorescence emission spectrum of probe **2z** was measured by 15 times and  $\sigma$  (the standard deviation of blank measurement) was achieved. The data were acquired at 516 nm ( $n = 15$ ), and  $\sigma$  was 0.295761 by calculation. The  $k$  was 2.47663. Detection limit =  $3\sigma/k = 0.358$   $\mu\text{M}$ .

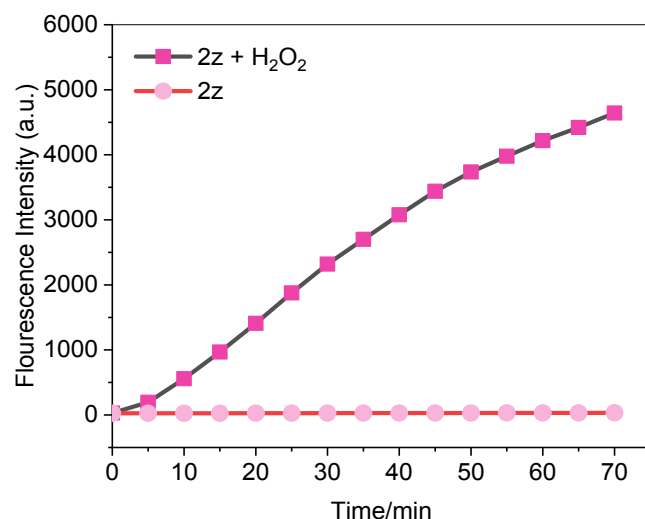

**Figure S14.** Intensity changes of **2z** in fluorescence at 516 nm ( $\lambda_{\text{ex}} = 360$  nm) over time with or without  $\text{H}_2\text{O}_2$

### 6.3 Fluorescent probe for hydrogen peroxide of **2ab**

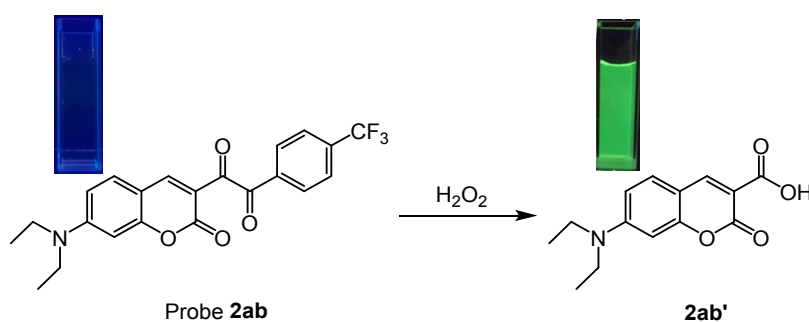

**Scheme S7.** Fluorescent probe for hydrogen peroxide of **2ab**

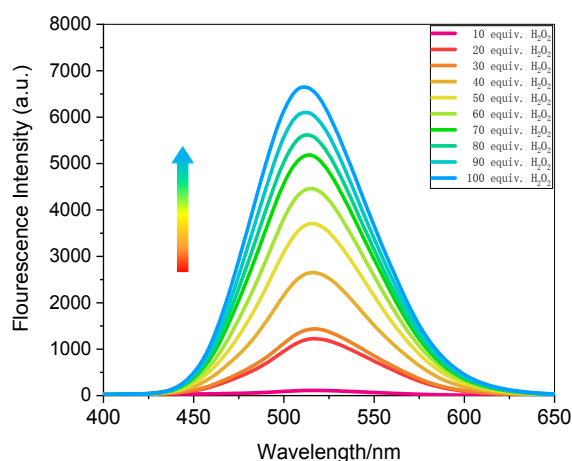

**Figure S15.** Fluorescent emission spectra of probe **2ab** ( $10 \mu\text{M}$ ) in the presence of 10-100 equiv. of  $\text{H}_2\text{O}_2$ . Data were acquired at 512 nm

The fluorescence emission spectrum of probe **2ab** was measured by 15 times and  $\sigma$  (the standard deviation of blank measurement) was achieved. The data were acquired at 512 nm ( $n = 15$ ), and  $\sigma$  was 0.364074 by calculation. The  $k$  was 7.29904. Detection limit =  $3\sigma/k = 0.149 \mu\text{M}$ .

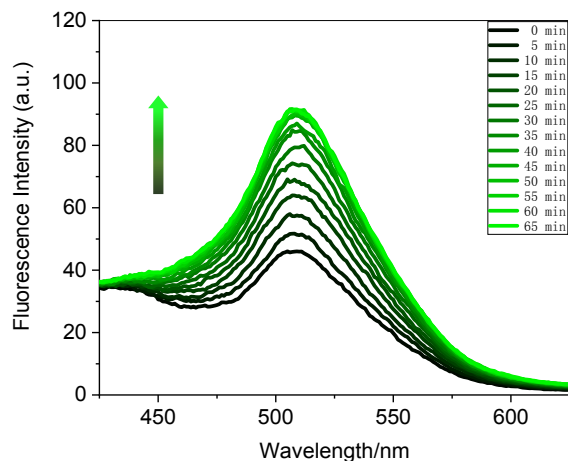

**Figure S16.** Time-dependent fluorescence spectral changes of probe **2ab** with 10 equiv. of  $\text{H}_2\text{O}_2$  ( $\lambda_{\text{ex}} = 360 \text{ nm}$ , steady excitation)

## 7. References

- 1 X. Wu, M. Jia, M. Huang, J. K. Kim, Z. Zhao, J. Liu, J. Xi, Y. Li and Y. Wu, *Org. Biomol. Chem.*, 2020, **18**, 3346-3353.
- 2 J. Su, Y. Zhang, M. Chen, W. Li, X. Qin, Y. Xie, L. Qin, S. Huang and M. Zhang, *Synlett*, 2019, **30**, 630-634.
- 3 A. Wu, J. L. Kolanowski, B. B. Boumelhem, K. Yang, R. Lee, A. Kaur, S. T. Fraser, E. J. New and L. M. Rendina, *Chem. Asian J.*, 2017, **12**, 1704-1708.
- 4 K. M. Zhang, W. Dou, P. X. Li, R. Shen, J. X. Ru, W. Liu, Y. M. Cui, C. Y. Chen, W. S. Liu and D. C. Bai, *Biosens. Bioelectron.*, 2015, **64**, 542-546.

## 8. Characterization data

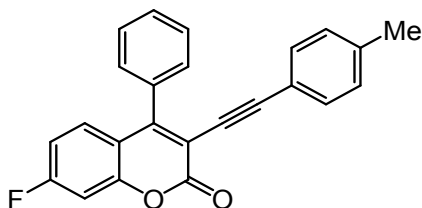

### 7-fluoro-4-phenyl-3-(*p*-tolylethynyl)-2*H*-chromen-2-one (1p)

Yellow solid (53.0 mg, 75%), mp. 204.9 - 207.3 °C. <sup>1</sup>H NMR (400 MHz, CDCl<sub>3</sub>): δ 7.61 - 7.52 (m, 3 H), 7.51 - 7.44 (m, 2 H), 7.30 - 7.23 (m, 1 H), 7.15 - 7.08 (m, 3 H), 7.07 - 7.01 (m, 2 H), 6.94 (td, *J* = 2.5, 8.4 Hz, 1 H), 2.31 (s, 3 H). <sup>13</sup>C NMR (100 MHz, CDCl<sub>3</sub>): δ 164.4 (d, *J* = 255.3 Hz), 159.2, 155.2, 153.9 (d, *J* = 13.2 Hz), 139.2, 134.3, 131.6, 129.5, 129.3 (d, *J* = 10.3 Hz), 129.1, 129.0, 128.5, 119.3, 116.6 (d, *J* = 2.9 Hz), 112.6 (d, *J* = 22.7), 110.3 (d, *J* = 2.9 Hz), 104.5 (d, *J* = 25.7 Hz), 99.1, 82.9, 21.6. <sup>19</sup>F NMR (376.5 MHz, CDCl<sub>3</sub>): δ -104.8. HRMS (ESI) calcd. for C<sub>24</sub>H<sub>15</sub>FO<sub>2</sub> (M+H)<sup>+</sup>: 355.1129, found: 355.1128.

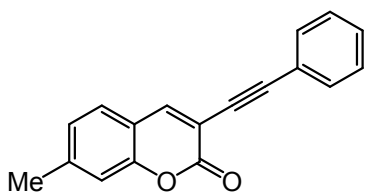

### 7-methyl-3-(phenylethynyl)-2*H*-chromen-2-one (1q)

White solid (38.1 mg, 73%). mp. 166.6 - 169.2 °C. <sup>1</sup>H NMR (400 MHz, CDCl<sub>3</sub>): δ 7.91 (s, 1 H), 7.57 (dd, *J* = 3.0, 6.5 Hz, 2 H), 7.40 - 7.32 (m, 4 H), 7.16 - 7.08 (m, 2 H), 2.46 (s, 3 H). <sup>13</sup>C NMR (100 MHz, CDCl<sub>3</sub>): δ 159.6, 153.5, 144.8, 143.7, 131.9, 129.0, 128.4, 127.4, 126.1, 122.4, 117.0, 116.6, 111.8, 95.3, 83.5, 21.9. HRMS (ESI) calcd. for C<sub>18</sub>H<sub>12</sub>O<sub>2</sub> (M+H)<sup>+</sup>: 261.0910, found: 261.0909.

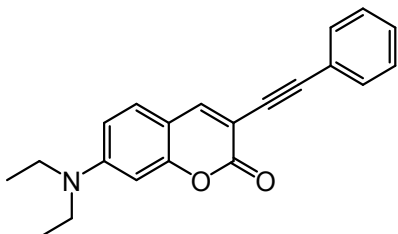

### 7-(diethylamino)-3-(phenylethynyl)-2*H*-chromen-2-one (1r)

Yellow solid (59.1 mg, 92%), mp. 145.7 - 148.6 °C. <sup>1</sup>H NMR (400 MHz, CDCl<sub>3</sub>): δ 7.79 (s, 1 H), 7.58 - 7.51 (m, 2 H), 7.36 - 7.30 (m, 3 H), 7.27 - 7.22 (m, 1 H), 6.58 (dd, *J* = 2.4, 8.9 Hz, 1 H), 6.49 (d, *J* = 2.3 Hz, 1 H), 3.42 (q, *J* = 7.1 Hz, 4 H), 1.22 (t, *J* = 7.1 Hz, 6 H). <sup>13</sup>C NMR (100 MHz, CDCl<sub>3</sub>):

$\delta$  161.0, 156.3, 151.1, 145.5, 131.7, 128.9, 128.4, 128.3, 123.1, 109.2, 108.4, 104.7, 97.3, 93.3, 84.6, 45.0, 12.5. HRMS (ESI) calcd. for  $C_{21}H_{19}NO_2$  ( $M+H$ )<sup>+</sup>: 318.1489, found: 318.1488.

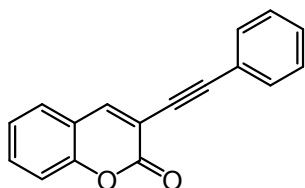

### 3-(phenylethynyl)-2H-chromen-2-one (1s)

Light yellow solid (30.6 mg, 62%), mp. 174.6 - 176.9 °C. <sup>1</sup>H NMR (400 MHz, CDCl<sub>3</sub>):  $\delta$  7.95 (s, 1 H), 7.63 - 7.46 (m, 4 H), 7.40 - 7.27 (m, 5 H). <sup>13</sup>C NMR (100 MHz, CDCl<sub>3</sub>):  $\delta$  159.3, 153.3, 144.7, 132.1, 132.0, 129.1, 128.4, 127.7, 124.8, 122.2, 118.9, 116.8, 113.1, 95.8, 83.3. HRMS (ESI) calcd. for  $C_{17}H_{10}O_2$  ( $M+H$ )<sup>+</sup>: 247.0754, found: 247.0755.

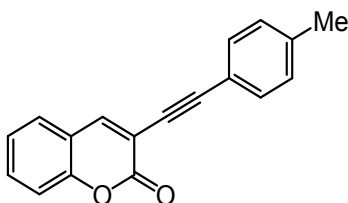

### 3-(p-tolylethynyl)-2H-chromen-2-one (1t)

Yellow solid (36.3 mg, 70%), mp. 132.3 - 135.7 °C. <sup>1</sup>H NMR (400 MHz, CDCl<sub>3</sub>):  $\delta$  7.92 (s, 1 H), 7.56 - 7.43 (m, 4 H), 7.36 - 7.25 (m, 2 H), 7.16 (d,  $J$  = 7.9 Hz, 2 H), 2.37 (s, 3 H). <sup>13</sup>C NMR (100 MHz, CDCl<sub>3</sub>):  $\delta$  159.4, 153.2, 144.4, 139.5, 132.0, 131.9, 129.2, 127.7, 124.8, 119.1, 119.0, 116.8, 113.2, 96.2, 82.8, 21.6. HRMS (ESI) calcd. for  $C_{18}H_{12}O_2$  ( $M+H$ )<sup>+</sup>: 261.0910, found: 261.0912.

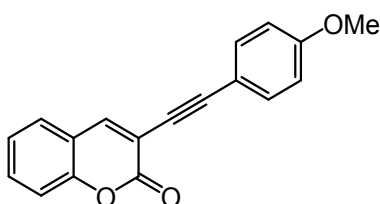

### 3-((4-methoxyphenyl)ethynyl)-2H-chromen-2-one (1u)

Yellow solid (33.1 mg, 60%), mp. 162.1 - 164.9 °C. <sup>1</sup>H NMR (400 MHz, CDCl<sub>3</sub>):  $\delta$  7.90 (s, 1 H), 7.55 - 7.46 (m, 4 H), 7.37 - 7.27 (m, 2 H), 6.88 (d,  $J$  = 8.8 Hz, 2 H), 3.83 (s, 3 H). <sup>13</sup>C NMR (100 MHz, CDCl<sub>3</sub>):  $\delta$  160.3, 159.4, 153.2, 144.0, 133.6, 131.9, 127.6, 124.8, 119.0, 116.8, 114.3, 114.1, 113.4, 96.2, 82.3, 55.3. HRMS (ESI) calcd. for  $C_{18}H_{12}O_3$  ( $M+H$ )<sup>+</sup>: 277.0859, found: 277.0856.



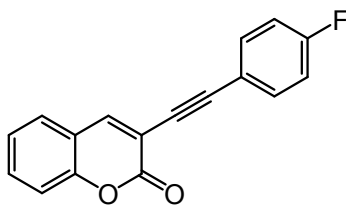

### 3-((4-fluorophenyl)ethynyl)-2H-chromen-2-one (1v)

White solid (37.9 mg, 77%), mp. 61.5 - 61.8 °C. <sup>1</sup>H NMR (400 MHz, CDCl<sub>3</sub>): δ 7.94 (s, 1 H), 7.64 - 7.45 (m, 4 H), 7.40 - 7.27 (m, 2 H), 7.12 - 7.01 (m, 2 H). <sup>13</sup>C NMR (100 MHz, CDCl<sub>3</sub>): δ 163.0 (d, *J* = 250.9 Hz), 159.3, 153.3, 144.7, 134.0 (d, *J* = 8.8 Hz), 132.2, 127.7, 124.9, 118.9, 118.3 (d, *J* = 2.9 Hz), 116.8, 115.9 (d, *J* = 22.0 Hz), 113.0, 94.7, 83.1. HRMS (ESI) calcd. for C<sub>17</sub>H<sub>9</sub>FO<sub>2</sub> (M+H)<sup>+</sup>: 265.0659, found: 265.0656.

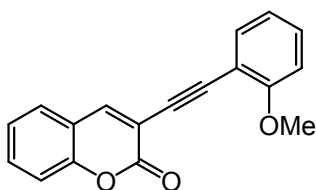

### 3-((2-methoxyphenyl)ethynyl)-2H-chromen-2-one (1w)

Yellow solid (29.0 mg, 53%), mp. 107.3 - 109.6 °C. <sup>1</sup>H NMR (400 MHz, CDCl<sub>3</sub>): δ 7.96 (s, 1 H), 7.58 - 7.45 (m, 3 H), 7.38 - 7.25 (m, 3 H), 6.98 - 6.89 (m, 2 H), 3.93 (s, 3 H). <sup>13</sup>C NMR (100 MHz, CDCl<sub>3</sub>): δ 160.3, 159.4, 153.3, 144.4, 134.0, 132.0, 130.8, 127.7, 124.8, 120.5, 119.0, 116.8, 113.4, 111.4, 110.7, 92.5, 87.3, 55.9. HRMS (ESI) calcd. for C<sub>18</sub>H<sub>12</sub>O<sub>3</sub> (M+H)<sup>+</sup>: 277.0859, found: 277.0861.

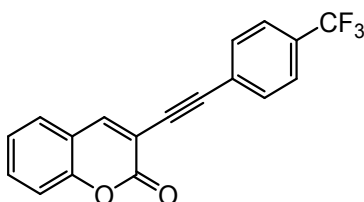

### 3-((4-(trifluoromethyl)phenyl)ethynyl)-2H-chromen-2-one (1x)

Yellow solid (48.5 mg, 77%), mp. 140.3 - 142.8 °C. <sup>1</sup>H NMR (400 MHz, CDCl<sub>3</sub>): δ 8.00 (s, 1 H), 7.71 - 7.66 (m, *J* = 8.2 Hz, 2 H), 7.65 - 7.60 (m, *J* = 8.4 Hz, 2 H), 7.57 (td, *J* = 1.6, 7.8 Hz, 1 H), 7.51 (dd, *J* = 1.4, 7.8 Hz, 1 H), 7.39 - 7.29 (m, 2 H). <sup>13</sup>C NMR (100 MHz, CDCl<sub>3</sub>): δ 159.1, 153.5, 145.6, 132.6, 132.2, 130.7 (q, *J* = 33.0 Hz), 127.9, 126.0 (d, *J* = 1.47 Hz), 125.4 (q, *J* = 3.7 Hz), 125.0, 123.8 (d, *J* = 272.2 Hz), 118.7, 116.9, 112.5, 94.0, 85.5. <sup>19</sup>F NMR (376.5 MHz, CDCl<sub>3</sub>): δ -62.9. HRMS (ESI) calcd. for C<sub>18</sub>H<sub>9</sub>F<sub>3</sub>O<sub>2</sub> (M+H)<sup>+</sup>: 315.0627, found: 315.0627.

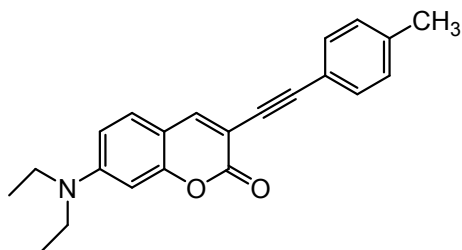

**7-(diethylamino)-3-(*p*-tolylethynyl)-2*H*-chromen-2-one (1y)**

Yellow solid (58.6 mg, 88%), mp. 182.5 - 184.7 °C. <sup>1</sup>H NMR (400 MHz, CDCl<sub>3</sub>): δ 7.77 (s, 1 H), 7.47 - 7.41 (m, *J* = 8.1 Hz, 2 H), 7.24 (d, *J* = 8.8 Hz, 1 H), 7.17 - 7.10 (m, *J* = 7.9 Hz, 2 H), 6.58 (dd, *J* = 2.4, 8.9 Hz, 1 H), 6.52 - 6.45 (m, 1 H), 3.42 (q, *J* = 7.1 Hz, 4 H), 2.36 (s, 3 H), 1.22 (t, *J* = 7.1 Hz, 6 H). <sup>13</sup>C NMR (100 MHz, CDCl<sub>3</sub>): δ 161.0, 156.2, 151.0, 145.2, 138.5, 131.6, 129.0, 128.8, 120.0, 109.2, 108.5, 105.0, 97.3, 93.5, 83.9, 44.9, 21.5, 12.5. HRMS (ESI) calcd. for C<sub>22</sub>H<sub>21</sub>NO<sub>2</sub> (M+H)<sup>+</sup>: 332.1645, found: 332.1645.

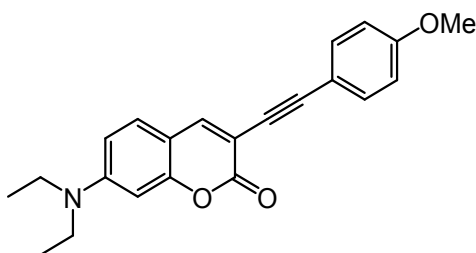

**7-(diethylamino)-3-((4-methoxyphenyl)ethynyl)-2*H*-chromen-2-one (1z)**

Yellow solid (59.6 mg, 85%), mp. 135.1 - 137.6 °C. <sup>1</sup>H NMR (400 MHz, CDCl<sub>3</sub>): δ 7.75 (s, 1 H), 7.51 - 7.45 (m, 2 H), 7.23 (d, *J* = 8.8 Hz, 1 H), 6.88 - 6.83 (m, 2 H), 6.57 (dd, *J* = 2.5, 8.9 Hz, 1 H), 6.47 (d, *J* = 2.3 Hz, 1 H), 3.82 (s, 3 H), 3.41 (q, *J* = 7.1 Hz, 4 H), 1.21 (t, *J* = 7.1 Hz, 6 H). <sup>13</sup>C NMR (100 MHz, CDCl<sub>3</sub>): δ 161.1, 159.7, 156.1, 150.9, 145.0, 133.2, 128.8, 115.2, 113.9, 109.2, 108.5, 105.0, 97.3, 93.4, 83.3, 55.3, 44.9, 12.5. HRMS (ESI) calcd. for C<sub>22</sub>H<sub>21</sub>NO<sub>3</sub> (M+H)<sup>+</sup>: 348.1594, found: 348.1598.

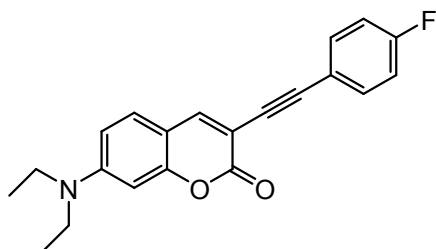

**7-(diethylamino)-3-((4-fluorophenyl)ethynyl)-2*H*-chromen-2-one (1aa)**

Yellow solid (61.8 mg, 92%), mp. 163.7 - 165.6 °C. <sup>1</sup>H NMR (400 MHz, CDCl<sub>3</sub>): δ 7.78 (s, 1 H), 7.56 - 7.49 (m, 2 H), 7.24 (s, 1 H), 7.02 (t, *J* = 8.7 Hz, 2 H), 6.59 (dd, *J* = 2.3, 8.8 Hz, 1 H), 6.49 (s, 1 H), 3.43 (d, *J* = 7.1 Hz, 4 H), 1.22 (t, *J* = 7.2 Hz, 6 H). <sup>13</sup>C NMR (100 MHz, CDCl<sub>3</sub>): δ 162.6 (d, *J* = 249.2 Hz), 160.9, 156.3, 151.1, 145.5, 133.6, 128.9, 119.2 (d, *J* = 3.67 Hz), 115.6 (d, *J* = 22.0 Hz), 109.3, 108.4, 104.5, 97.4, 92.2, 84.3, 45.0, 12.5. <sup>19</sup>F NMR (376.5 MHz, CDCl<sub>3</sub>): δ -110.73. HRMS (ESI) calcd. for C<sub>21</sub>H<sub>18</sub>FNO<sub>2</sub> (M+H)<sup>+</sup>: 336.1394, found: 336.1394.

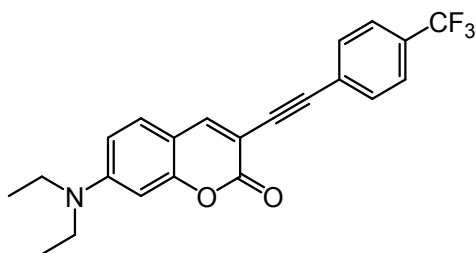

**7-(diethylamino)-3-((4-(trifluoromethyl)phenyl)ethynyl)-2H-chromen-2-one (1ab)**

White solid (68.9 mg, 89%), mp. 184.7 - 186.4 °C. <sup>1</sup>H NMR (400 MHz, CDCl<sub>3</sub>): δ 7.83 (s, 1 H), 7.66 - 7.61 (m, *J* = 8.1 Hz, 2 H), 7.61 - 7.56 (m, *J* = 8.6 Hz, 2 H), 7.29 - 7.24 (m, 1 H), 6.60 (dd, *J* = 2.4, 8.9 Hz, 1 H), 6.49 (d, *J* = 2.3 Hz, 1 H), 3.43 (q, *J* = 7.1 Hz, 4 H), 1.23 (t, *J* = 7.1 Hz, 6 H). <sup>13</sup>C NMR (100 MHz, CDCl<sub>3</sub>): δ 160.8, 156.5, 151.4, 146.3, 131.8, 129.8 (q, *J* = 33.0 Hz), 129.2, 126.9 (d, *J* = 1.5 Hz), 124.0 (q, *J* = 272.2 Hz), 125.2 (q, *J* = 3.7 Hz), 109.4, 108.3, 103.8, 97.3, 91.8, 87.2, 45.0, 12.5. <sup>19</sup>F NMR (376.5 MHz, CDCl<sub>3</sub>): δ -62.8. HRMS (ESI) calcd. for C<sub>22</sub>H<sub>18</sub>F<sub>3</sub>NO<sub>3</sub> (M+H)<sup>+</sup>: 386.1362, found: 386.1362.

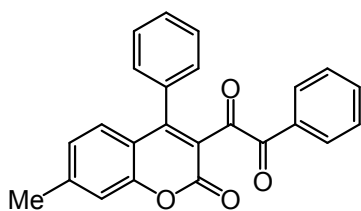

**1-(7-methyl-2-oxo-4-phenyl-2H-chromen-3-yl)-2-phenylethane-1,2-dione (2a)**

Yellow solid (64.0 mg, 87%), mp. 150.1 - 151.7 °C. <sup>1</sup>H NMR (400 MHz, CDCl<sub>3</sub>): δ 7.96 (d, *J* = 7.5 Hz, 2 H), 7.62 - 7.53 (m, 1 H), 7.50 - 7.35 (m, 7 H), 7.28 - 7.22 (m, 1 H), 7.18 (d, *J* = 8.2 Hz, 1 H), 7.06 (d, *J* = 8.1 Hz, 1 H), 2.47 (s, 3 H). <sup>13</sup>C NMR (100 MHz, CDCl<sub>3</sub>): δ 191.3, 190.7, 159.8, 158.9, 154.3, 145.9, 134.2, 132.5, 132.0, 130.4, 130.4, 129.6, 128.8, 128.7, 128.5, 128.3, 126.3, 121.8, 117.5, 117.3, 21.9. HRMS (ESI) calcd. for C<sub>24</sub>H<sub>16</sub>O<sub>4</sub> (M+H)<sup>+</sup>: 369.1121, found: 369.1123.

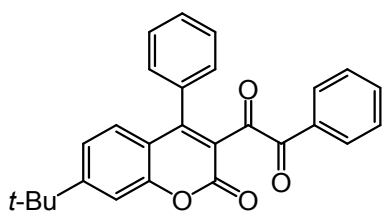

**1-(7-(*tert*-butyl)-2-oxo-4-phenyl-2*H*-chromen-3-yl)-2-phenylethane-1,2-dione (2b)**

Yellow solid (62.0 mg, 76%), mp. 173.7 - 175.3 °C. <sup>1</sup>H NMR (400 MHz, CDCl<sub>3</sub>): δ 8.00 - 7.92 (m, 2 H), 7.59 (t, *J* = 7.5 Hz, 1 H), 7.49 - 7.42 (m, 6 H), 7.42 - 7.37 (m, 2 H), 7.33 - 7.27 (m, 1 H), 7.25 (d, *J* = 8.4 Hz, 1 H), 1.35 (s, 9 H). <sup>13</sup>C NMR (100 MHz, CDCl<sub>3</sub>): δ 191.3, 190.7, 160.0, 159.0, 158.8, 154.3, 134.2, 132.5, 132.0, 130.4, 129.6, 128.7, 128.7, 128.5, 128.2, 122.6, 122.0, 117.2, 114.1, 35.5, 30.9. HRMS (ESI) calcd. for C<sub>27</sub>H<sub>22</sub>O<sub>4</sub> (M+H)<sup>+</sup>: 394.2013, found: 394.2015.

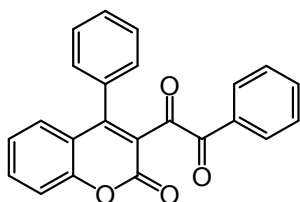

**1-(2-oxo-4-phenyl-2*H*-chromen-3-yl)-2-phenylethane-1,2-dione (2c)**

Yellow solid (52.5 mg, 74%), mp. 178.1 - 180.9 °C. <sup>1</sup>H NMR (400 MHz, CDCl<sub>3</sub>): δ 8.02 - 7.94 (m, 2 H), 7.69 - 7.55 (m, 2 H), 7.52 - 7.38 (m, 8 H), 7.36 - 7.31 (m, 1 H), 7.30 - 7.23 (m, 1 H). <sup>13</sup>C NMR (100 MHz, CDCl<sub>3</sub>): δ 191.0, 190.4, 159.5, 158.5, 154.1, 134.3, 133.9, 132.2, 131.8, 130.5, 129.7, 129.1, 128.7, 128.6, 128.3, 125.0, 123.2, 119.6, 117.3. HRMS (ESI) calcd. for C<sub>23</sub>H<sub>14</sub>O<sub>4</sub> (M+H)<sup>+</sup>: 355.0965, found: 355.0967.

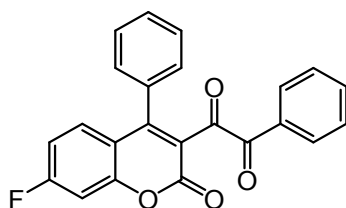

**1-(7-fluoro-2-oxo-4-phenyl-2*H*-chromen-3-yl)-2-phenylethane-1,2-dione (2d)**

Yellow solid (49.2 mg, 66%), mp. 165.8 - 167.4 °C. <sup>1</sup>H NMR (400 MHz, CDCl<sub>3</sub>): δ 7.99 - 7.93 (m, 2 H), 7.64 - 7.56 (m, 1 H), 7.51 - 7.42 (m, 5 H), 7.41 - 7.36 (m, 2 H), 7.33 (dd, *J* = 6.1, 8.9 Hz, 1 H), 7.16 (dd, *J* = 2.3, 8.7 Hz, 1 H), 7.00 (td, *J* = 2.4, 8.4 Hz, 1 H). <sup>13</sup>C NMR (100 MHz, CDCl<sub>3</sub>): δ 190.7, 190.4, 165.7 (d, *J* = 258.23 Hz), 159.2, 158.1, 155.4 (d, *J* = 13.2 Hz), 134.4, 132.1, 131.8, 131.1 (d, *J* = 10.3 Hz), 130.4, 129.9, 128.9, 128.6, 128.2, 122.2 (d, *J* = 2.9 Hz), 116.5 (d, *J* = 2.9 Hz), 113.3 (d, *J* = 22.7 Hz), 104.9 (d, *J* = 25.7 Hz). <sup>19</sup>F NMR (376.5 MHz, CDCl<sub>3</sub>): δ -101.2. HRMS (ESI) calcd. for C<sub>23</sub>H<sub>13</sub>FO<sub>4</sub> (M+Na)<sup>+</sup>: 395.0690, found: 395.0693.

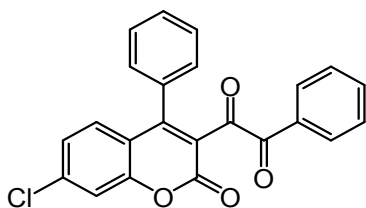

**1-(7-chloro-2-oxo-4-phenyl-2H-chromen-3-yl)-2-phenylethane-1,2-dione (2e)**

Yellow solid (54.3 mg, 70%). mp. 225.8 - 227.5 °C. <sup>1</sup>H NMR (400 MHz, CDCl<sub>3</sub>): δ 8.00 - 7.91 (m, 2 H), 7.63 - 7.56 (m, 1 H), 7.50 - 7.42 (m, 6 H), 7.41 - 7.34 (m, 2 H), 7.29 - 7.20 (m, 2 H). <sup>13</sup>C NMR (100 MHz, CDCl<sub>3</sub>): δ 190.6, 190.3, 158.9, 157.8, 154.3, 140.1, 134.4, 131.9, 131.7, 130.5, 129.9, 128.9, 128.6, 128.2, 125.6, 123.1, 118.3, 117.6. HRMS (ESI) calcd. for C<sub>23</sub>H<sub>13</sub>ClO<sub>4</sub> (M+Na)<sup>+</sup>: 411.0395, found: 411.0396.

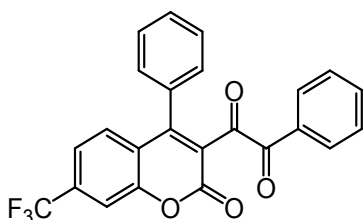

**1-(2-oxo-4-phenyl-7-(trifluoromethyl)-2H-chromen-3-yl)-2-phenylethane-1,2-dione (2f)**

Yellow solid (45.5 mg, 54%), mp. 148.1 - 149.7 °C. <sup>1</sup>H NMR (400 MHz, CDCl<sub>3</sub>): δ 8.02 - 7.94 (m, 2 H), 7.71 (s, 1 H), 7.65 - 7.57 (m, 1 H), 7.53 - 7.44 (m, 8 H), 7.41 (dd, *J* = 3.0, 6.7 Hz, 2 H). <sup>13</sup>C NMR (100 MHz, CDCl<sub>3</sub>): δ 190.1, 189.9, 158.6, 156.7, 153.6, 135.0 (q, *J* = 33.8 Hz), 134.6, 131.6, 131.4, 130.5, 130.1, 129.8, 129.0, 128.6, 128.3, 125.4, 122.9 (q, *J* = 272.9 Hz), 122.2, 121.4 (q, *J* = 3.67 Hz), 114.8 (q, *J* = 3.7 Hz). <sup>19</sup>F NMR (376.5 MHz, CDCl<sub>3</sub>): δ -63.14. HRMS (ESI) calcd. for C<sub>24</sub>H<sub>13</sub>F<sub>3</sub>O<sub>4</sub> (M+H)<sup>+</sup>: 423.0839, found: 423.0838.

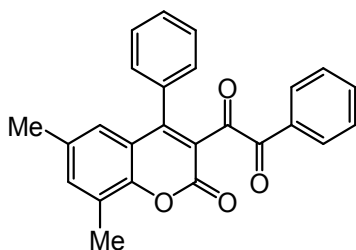

**1-(6,8-dimethyl-2-oxo-4-phenyl-2H-chromen-3-yl)-2-phenylethane-1,2-dione (2g)**

Yellow solid (67.1 mg, 88%), mp. 152.9 - 155.8 °C. <sup>1</sup>H NMR (400 MHz, CDCl<sub>3</sub>): δ 7.96 (d, *J* = 7.5 Hz, 2 H), 7.61 - 7.53 (m, 1 H), 7.50 - 7.41 (m, 5 H), 7.41 - 7.35 (m, 2 H), 7.30 (s, 1 H), 6.89 (s, 1 H), 2.45 (s, 3 H), 2.26 (s, 3 H). <sup>13</sup>C NMR (100 MHz, CDCl<sub>3</sub>): δ 191.3, 190.6, 159.8, 158.9, 150.7, 136.5,

134.2, 134.1, 132.7, 132.0, 130.4, 129.5, 128.6, 128.5, 128.3, 126.5, 126.4, 122.6, 119.2, 20.9, 15.5.  
HRMS (ESI) calcd. for C<sub>25</sub>H<sub>18</sub>O<sub>4</sub> (M+Na)<sup>+</sup>: 405.1097, found: 405.1098.

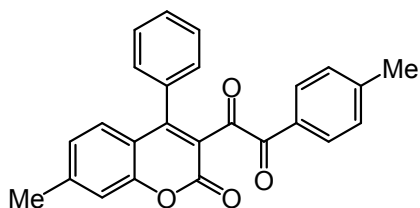

**1-(7-methyl-2-oxo-4-phenyl-2H-chromen-3-yl)-2-(p-tolyl)ethane-1,2-dione (2h)**

Yellow solid (64.8 mg, 85%), mp. 63.3 - 65.1 °C. <sup>1</sup>H NMR (400 MHz, CDCl<sub>3</sub>): δ 7.87 (d, *J* = 8.2 Hz, 2 H), 7.49 - 7.43 (m, 3 H), 7.41 - 7.36 (m, 2 H), 7.25 (d, *J* = 8.6 Hz, 3 H), 7.18 (d, *J* = 8.2 Hz, 1 H), 7.06 (dd, *J* = 1.0, 8.2 Hz, 1 H), 2.47 (s, 3 H), 2.40 (s, 3 H). <sup>13</sup>C NMR (100 MHz, CDCl<sub>3</sub>): δ 191.4, 190.3, 159.8, 158.7, 154.2, 145.8, 145.4, 132.6, 130.5, 129.6, 129.5, 129.3, 128.8, 128.7, 128.3, 126.2, 122.0, 117.4, 117.3, 21.9. HRMS (ESI) calcd. for C<sub>25</sub>H<sub>18</sub>O<sub>4</sub> (M+Na)<sup>+</sup>: 405.1097, found: 405.1099.

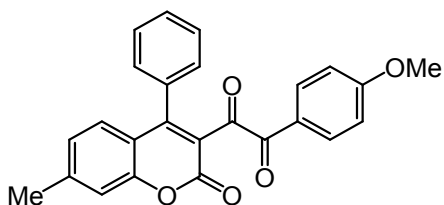

**1-(4-methoxyphenyl)-2-(7-methyl-2-oxo-4-phenyl-2H-chromen-3-yl)ethane-1,2-dione (2i)**

Yellow oil (65.5 mg, 82%). <sup>1</sup>H NMR (400 MHz, CDCl<sub>3</sub>): δ 7.99 - 7.92 (m, 2 H), 7.48 - 7.42 (m, 3 H), 7.42 - 7.35 (m, 2 H), 7.23 (s, 1 H), 7.18 (d, *J* = 8.2 Hz, 1 H), 7.09 - 7.01 (m, 1 H), 6.95 - 6.87 (m, 2 H), 3.86 (s, 3 H), 2.47 (s, 3 H). <sup>13</sup>C NMR (100 MHz, CDCl<sub>3</sub>): δ 191.5, 189.2, 164.5, 159.7, 158.4, 154.2, 145.7, 132.9, 132.6, 129.5, 128.7, 128.6, 128.3, 126.2, 124.9, 122.3, 117.4, 117.3, 114.0, 55.6, 21.9. HRMS (ESI) calcd. for C<sub>25</sub>H<sub>18</sub>O<sub>5</sub> (M+Na)<sup>+</sup>: 421.1046, found: 421.1047.

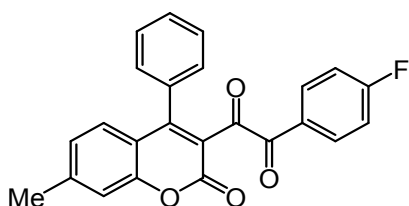

**1-(4-fluorophenyl)-2-(7-methyl-2-oxo-4-phenyl-2H-chromen-3-yl)ethane-1,2-dione (2j)**

Yellow solid (61.7 mg, 80%), mp. 126.4 - 128.2 °C. <sup>1</sup>H NMR (400 MHz, CDCl<sub>3</sub>): δ 8.04 - 7.97 (m, 2 H), 7.50 - 7.43 (m, 3 H), 7.41 - 7.36 (m, 2 H), 7.26 (d, *J* = 3.2 Hz, 1 H), 7.20 (d, *J* = 8.2 Hz, 1 H), 7.16 - 7.05 (m, 3 H), 2.49 (s, 3 H). <sup>13</sup>C NMR (100 MHz, CDCl<sub>3</sub>): δ 191.2, 189.1, 166.5 (d, *J* = 256.8 Hz), 159.9, 159.0, 154.3, 146.0, 133.2 (d, *J* = 9.5 Hz), 132.4, 129.7, 128.9, 128.7, 128.4 (d, *J* = 2.9

Hz), 128.2, 126.3, 121.7, 117.5, 117.3, 115.8 (d,  $J = 22.0$  Hz), 21.9.  $^{19}\text{F}$  NMR (376.5 MHz,  $\text{CDCl}_3$ ):  $\delta$  -120.6. HRMS (ESI) calcd. for  $\text{C}_{24}\text{H}_{15}\text{FO}_4$  ( $\text{M}+\text{Na}$ ) $^+$ : 409.0847, found: 409.0849.

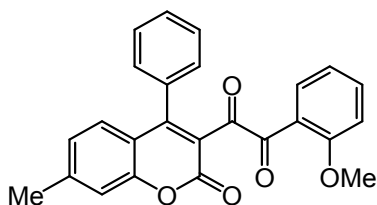

**1-(2-methoxyphenyl)-2-(7-methyl-2-oxo-4-phenyl-2H-chromen-3-yl)ethane-1,2-dione (2l)**

Yellow solid (51.5 mg, 65%). mp. 147.3 - 149.5 °C.  $^1\text{H}$  NMR (400 MHz,  $\text{CDCl}_3$ ):  $\delta$  7.93 (dd,  $J = 1.7, 7.8$  Hz, 1 H), 7.55 - 7.45 (m, 4 H), 7.36 - 7.29 (m, 2 H), 7.23 (s, 1 H), 7.16 - 7.11 (m, 1 H), 7.07 - 7.01 (m, 2 H), 6.93 (d,  $J = 8.4$  Hz, 1 H), 3.74 (s, 3 H), 2.47 (s, 3 H).  $^{13}\text{C}$  NMR (100 MHz,  $\text{CDCl}_3$ ):  $\delta$  190.8, 189.4, 160.8, 160.3, 159.9, 154.5, 146.2, 135.7, 133.3, 131.0, 129.3, 129.1, 128.5, 127.8, 126.1, 122.9, 121.1, 118.8, 117.9, 117.3, 112.5, 56.2, 21.9. HRMS (ESI) calcd. for  $\text{C}_{25}\text{H}_{18}\text{O}_5$  ( $\text{M}+\text{H}$ ) $^+$ : 399.1127, found: 399.1129.

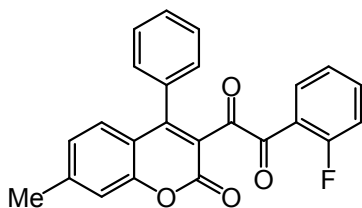

**1-(2-fluorophenyl)-2-(7-methyl-2-oxo-4-phenyl-2H-chromen-3-yl)ethane-1,2-dione (2m)**

White solid (30.7 mg, 41%), mp. 178.3 - 180.2 °C.  $^1\text{H}$  NMR (400 MHz,  $\text{CDCl}_3$ ):  $\delta$  8.02 - 7.93 (m, 1 H), 7.63 - 7.54 (m, 1 H), 7.53 - 7.45 (m, 3 H), 7.36 (dd,  $J = 2.8, 6.4$  Hz, 2 H), 7.29 - 7.24 (m, 3 H), 7.18 (d,  $J = 8.3$  Hz, 1 H), 7.14 - 7.04 (m, 2 H), 2.49 (s, 3 H).  $^{13}\text{C}$  NMR (100 MHz,  $\text{CDCl}_3$ ):  $\delta$  189.8, 188.5, 162.8 (d,  $J = 258.9$  Hz), 161.0, 160.3, 154.5, 146.5, 136.0 (d,  $J = 9.5$  Hz), 132.8, 131.2 (d,  $J = 1.5$  Hz), 129.4, 129.3, 128.6, 127.9, 126.3, 124.4 (d,  $J = 3.7$  Hz), 121.4 (d,  $J = 11.0$  Hz), 119.2, 117.7, 117.4, 116.5 (d,  $J = 22.0$  Hz), 22.0.  $^{19}\text{F}$  NMR (376.5 MHz,  $\text{CDCl}_3$ ):  $\delta$  -106.7. HRMS (ESI) calcd. for  $\text{C}_{24}\text{H}_{15}\text{FO}_4$  ( $\text{M}+\text{Na}$ ) $^+$ : 409.0847, found: 409.0845.

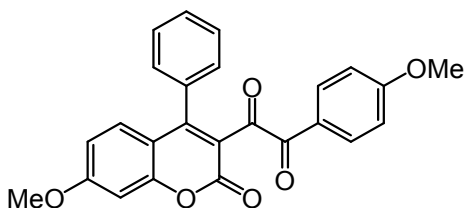

**1-(7-methoxy-2-oxo-4-phenyl-2H-chromen-3-yl)-2-(4-methoxyphenyl)ethane-1,2-dione (2n)**

Yellow oil (68.6 mg, 55%).  $^1\text{H}$  NMR (400 MHz,  $\text{CDCl}_3$ ):  $\delta$  7.93 (d,  $J = 8.7$  Hz, 2 H), 7.43 (s, 3 H), 7.40 - 7.33 (m, 2 H), 7.19 (d,  $J = 8.8$  Hz, 1 H), 6.95 - 6.85 (m, 3 H), 6.79 (dd,  $J = 2.3, 9.0$  Hz, 1 H),

3.88 (s, 3 H), 3.85 (s, 3 H). <sup>13</sup>C NMR (100 MHz, CDCl<sub>3</sub>): δ 191.7, 189.5, 164.6, 164.5, 159.9, 159.1, 156.3, 132.9, 132.8, 130.3, 129.5, 128.6, 128.2, 125.0, 119.7, 113.9, 113.5, 113.3, 100.9, 56.1, 55.6. HRMS (ESI) calcd. for C<sub>25</sub>H<sub>18</sub>O<sub>6</sub> (M+Na)<sup>+</sup>: 437.0996, found: 437.0998.

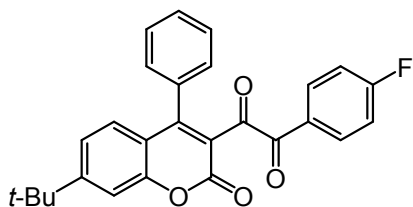

**1-(7-(*tert*-butyl)-2-oxo-4-phenyl-2*H*-chromen-3-yl)-2-(4-fluorophenyl)ethane-1,2-dione (2o)**

Yellow solid (68.6 mg, 80%). mp. 144.9 - 147.3 °C. <sup>1</sup>H NMR (400 MHz, CDCl<sub>3</sub>): δ 8.04 - 7.97 (m, 2 H), 7.50 - 7.43 (m, 4 H), 7.39 (dd, *J* = 3.0, 6.8 Hz, 2 H), 7.34 - 7.28 (m, 1 H), 7.27 - 7.23 (m, 1 H), 7.17 - 7.09 (m, 2 H), 1.36 (s, 9 H). <sup>13</sup>C NMR (100 MHz, CDCl<sub>3</sub>): δ 191.1, 189.1, 166.4 (d, *J* = 256.8 Hz), 160.0, 159.1, 158.9, 154.3, 133.2 (d, *J* = 9.5 Hz), 132.5, 129.6, 128.7, 128.6, 128.4 (d, *J* = 2.9 Hz), 128.2, 122.7, 121.9, 117.2, 115.8 (d, *J* = 22.0 Hz), 114.2, 35.5, 30.9. <sup>19</sup>F NMR (376.5 MHz, CDCl<sub>3</sub>): δ -102.7. HRMS (ESI) calcd. for C<sub>27</sub>H<sub>21</sub>FO<sub>4</sub> (M+H)<sup>+</sup>: 429.1497, found: 429.1493.

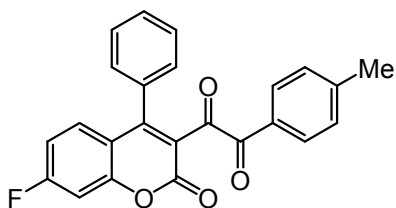

**1-(7-fluoro-2-oxo-4-phenyl-2*H*-chromen-3-yl)-2-(*p*-tolyl)ethane-1,2-dione (2p)**

Yellow solid (68.9 mg, 89%), mp. 144.3 - 146.1 °C. <sup>1</sup>H NMR (400 MHz, CDCl<sub>3</sub>): δ 7.86 (d, *J* = 8.3 Hz, 2 H), 7.49 - 7.43 (m, 3 H), 7.42 - 7.36 (m, 2 H), 7.32 (dd, *J* = 6.0, 8.8 Hz, 1 H), 7.25 (d, *J* = 7.8 Hz, 2 H), 7.15 (dd, *J* = 2.5, 8.5 Hz, 1 H), 7.03 - 6.96 (m, 1 H), 2.41 (s, 3 H). <sup>13</sup>C NMR (100 MHz, CDCl<sub>3</sub>): δ 190.8, 190.0, 165.6 (d, *J* = 258.2 Hz), 159.1, 157.8, 155.4 (d, *J* = 13.2 Hz), 145.6, 132.2, 131.0 (d, *J* = 10.3 Hz), 130.6, 129.8, 129.4, 129.3, 128.8, 128.2, 122.3 (d, *J* = 2.9 Hz), 116.5 (d, *J* = 2.9 Hz), 113.2 (d, *J* = 22.0 Hz), 104.8 (d, *J* = 25.7 Hz), 21.9. <sup>19</sup>F NMR (376.5 MHz, CDCl<sub>3</sub>): δ -101.5. HRMS (ESI) calcd. for C<sub>24</sub>H<sub>15</sub>FO<sub>4</sub> (M+H)<sup>+</sup>: 387.1027, found: 387.1029.

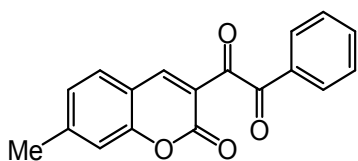

**1-(7-methyl-2-oxo-2*H*-chromen-3-yl)-2-phenylethane-1,2-dione (2q)**

Yellow solid (54.3 mg, 93%), mp. 175.6 - 177.3 °C. <sup>1</sup>H NMR (400 MHz, CDCl<sub>3</sub>): δ 8.64 (s, 1 H), 7.99 - 7.92 (m, 2 H), 7.67 - 7.58 (m, 2 H), 7.55 - 7.46 (m, 2 H), 7.23 - 7.18 (m, 2 H), 2.51 (s, 3 H).



$^{13}\text{C}$  NMR (100 MHz,  $\text{CDCl}_3$ ):  $\delta$  192.4, 191.6, 159.3, 156.0, 148.8, 147.8, 134.4, 132.4, 130.4, 129.8, 128.9, 126.8, 121.2, 117.4, 115.9, 22.3. HRMS (ESI) calcd. for  $\text{C}_{18}\text{H}_{12}\text{O}_4$  ( $\text{M}+\text{H}$ ) $^+$ : 293.0808, found: 293.0806.

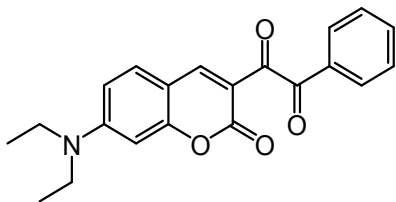

**1-(7-(sec-butyl)-2-oxo-2H-chromen-3-yl)-2-phenylethane-1,2-dione (2r)**

Yellow solid (43.3 mg, 62%), mp. 192.4 - 194.8  $^{\circ}\text{C}$ .  $^1\text{H}$  NMR (400 MHz,  $\text{CDCl}_3$ ):  $\delta$  8.53 (s, 1 H), 7.98 - 7.90 (m, 2 H), 7.59 (d,  $J$  = 7.5 Hz, 1 H), 7.46 (d,  $J$  = 9.0 Hz, 2 H), 7.50 (d,  $J$  = 7.8 Hz, 1 H), 6.66 (dd,  $J$  = 2.4, 9.0 Hz, 1 H), 6.47 (d,  $J$  = 2.3 Hz, 1 H), 3.48 (q,  $J$  = 7.2 Hz, 4 H), 1.26 (t,  $J$  = 7.2 Hz, 6 H).  $^{13}\text{C}$  NMR (100 MHz,  $\text{CDCl}_3$ ):  $\delta$  194.0, 192.2, 160.6, 159.4, 154.0, 148.3, 134.0, 133.0, 132.7, 129.5, 128.8, 112.9, 110.4, 108.6, 97.1, 45.4, 12.5. HRMS (ESI) calcd. for  $\text{C}_{21}\text{H}_{19}\text{NO}_4$  ( $\text{M}+\text{H}$ ) $^+$ : 350.1387, found: 350.1390.

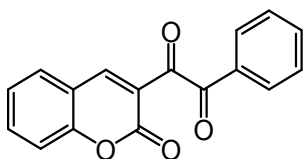

**1-(2-oxo-2H-chromen-3-yl)-2-phenylethane-1,2-dione (2s)**

Yellow solid (44.0 mg, 79%), mp. 152.1 - 154.3  $^{\circ}\text{C}$ .  $^1\text{H}$  NMR (400 MHz,  $\text{CDCl}_3$ ):  $\delta$  8.66 (s, 1 H), 8.00 - 7.93 (m, 2 H), 7.75 - 7.62 (m, 3 H), 7.56 - 7.48 (m, 2 H), 7.43 - 7.35 (m, 2 H).  $^{13}\text{C}$  NMR (100 MHz,  $\text{CDCl}_3$ ):  $\delta$  192.2, 191.3, 159.0, 155.7, 148.8, 135.4, 134.5, 132.3, 130.7, 129.8, 128.9, 125.4, 122.5, 118.2, 117.2. HRMS (ESI) calcd. for  $\text{C}_{17}\text{H}_{10}\text{O}_4$  ( $\text{M}+\text{H}$ ) $^+$ : 279.0652, found: 279.0649.

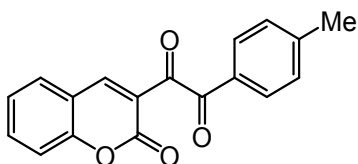

**1-(2-oxo-2H-chromen-3-yl)-2-(p-tolyl)ethane-1,2-dione (2t)**

Light yellow (49.8 mg, 85%), mp. 183.4 - 185.7  $^{\circ}\text{C}$ .  $^1\text{H}$  NMR (400 MHz,  $\text{CDCl}_3$ ):  $\delta$  8.65 (s, 1 H), 7.90 - 7.83 (m,  $J$  = 8.2 Hz, 2 H), 7.76 - 7.67 (m, 2 H), 7.43 - 7.36 (m, 2 H), 7.35 - 7.29 (m,  $J$  = 7.9 Hz, 2 H), 2.44 (s, 3 H).  $^{13}\text{C}$  NMR (100 MHz,  $\text{CDCl}_3$ ):  $\delta$  191.9, 191.4, 158.9, 155.7, 148.7, 145.8, 135.3, 130.6, 130.0, 129.8, 129.7, 125.4, 122.7, 118.2, 117.2, 22.0. HRMS (ESI) calcd. for  $\text{C}_{18}\text{H}_{12}\text{O}_4$  ( $\text{M}+\text{H}$ ) $^+$ : 293.0808, found: 293.0808.

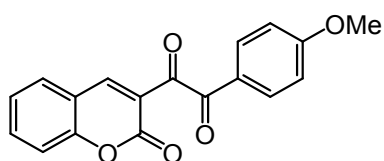

**1-(4-methoxyphenyl)-2-(2-oxo-2H-chromen-3-yl)ethane-1,2-dione (2u)**

Yellow solid (52.4 mg, 85%), mp. 166.7 - 168.2 °C. <sup>1</sup>H NMR (400 MHz, CDCl<sub>3</sub>): δ 8.63 (s, 1 H), 7.98 - 7.92 (m, 2 H), 7.73-7.67 (m, 2 H), 7.41 - 7.35 (m, 2 H), 7.02 - 6.93 (m, 2 H), 3.89 (s, 3 H). <sup>13</sup>C NMR (100 MHz, CDCl<sub>3</sub>): δ 191.3, 190.7, 164.8, 158.8, 155.7, 148.6, 135.2, 132.3, 130.5, 125.3, 125.3, 122.9, 118.2, 117.2, 114.4, 55.6. HRMS (ESI) calcd. for C<sub>18</sub>H<sub>12</sub>O<sub>5</sub> (M+H)<sup>+</sup>: 309.0757, found: 309.0756.

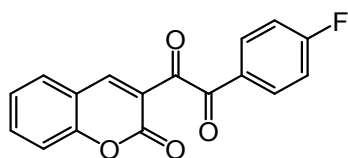

**1-(4-fluorophenyl)-2-(2-oxo-2H-chromen-3-yl)ethane-1,2-dione (2v)**

Light yellow (53.6 mg, 91%), mp. 180.9 - 182.3 °C. <sup>1</sup>H NMR (400 MHz, CDCl<sub>3</sub>): δ 8.65 (s, 1 H), 8.05 - 7.96 (m, 2 H), 7.78 - 7.67 (m, 2 H), 7.46 - 7.37 (m, 2 H), 7.20 (t, *J* = 8.7 Hz, 2 H). <sup>13</sup>C NMR (100 MHz, CDCl<sub>3</sub>): δ 191.0, 190.5, 166.6 (d, *J* = 257.5 Hz), 159.0, 155.7, 148.9, 135.5, 132.5 (d, *J* = 10.27 Hz), 130.7, 128.7 (d, *J* = 2.9 Hz), 125.5, 122.6, 118.1, 117.3, 116.3 (d, *J* = 22.0 Hz). <sup>19</sup>F NMR (376.5 MHz, CDCl<sub>3</sub>): δ -102.0. HRMS (ESI) calcd. for C<sub>17</sub>H<sub>9</sub>FO<sub>4</sub> (M+H)<sup>+</sup>: 297.0558, found: 297.0555.

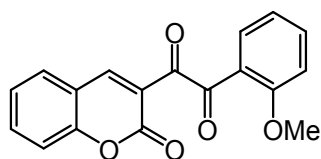

**1-(2-methoxyphenyl)-2-(2-oxo-2H-chromen-3-yl)ethane-1,2-dione (2w)**

Light yellow (26.3 mg, 43%), mp. 187.6 - 189.9 °C. <sup>1</sup>H NMR (400 MHz, CDCl<sub>3</sub>): δ 8.72 (s, 1 H), 8.08 (dd, *J* = 1.7, 7.8 Hz, 1 H), 7.76 - 7.66 (m, 2 H), 7.63 - 7.56 (m, 1 H), 7.43 - 7.35 (m, 2 H), 7.18 - 7.10 (m, 1 H), 6.97 (d, *J* = 8.3 Hz, 1 H), 3.71 (s, 3 H). <sup>13</sup>C NMR (100 MHz, CDCl<sub>3</sub>): δ 191.8, 189.1, 160.5, 159.0, 155.6, 147.9, 136.3, 135.0, 130.5, 130.4, 125.3, 122.9, 121.8, 121.7, 118.3, 117.1, 112.4, 56.0. HRMS (ESI) calcd. for C<sub>18</sub>H<sub>12</sub>O<sub>5</sub> (M+H)<sup>+</sup>: 309.0757, found: 309.0760.

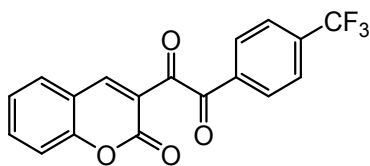

**1-(2-oxo-2*H*-chromen-3-yl)-2-(4-(trifluoromethyl)phenyl)ethane-1,2-dione (2x)**

Yellow solid (53.5 mg, 77%), mp. 196.1 - 197.2 °C. <sup>1</sup>H NMR (400 MHz, CDCl<sub>3</sub>): δ 8.68 (s, 1 H), 8.08 (d, *J* = 8.2 Hz, 2 H), 7.82 - 7.71 (m, 4 H), 7.45 - 7.38 (m, 2 H). <sup>13</sup>C NMR (100 MHz, CDCl<sub>3</sub>): δ 191.1, 190.8, 159.3, 155.7, 149.0, 135.7, 135.5 (d, *J* = 33.01 Hz), 135.0, 130.8, 130.0, 126.0 (q, *J* = 3.7 Hz), 125.6, 123.5 (q, *J* = 272.9 Hz), 122.3, 118.1, 117.3. <sup>19</sup>F NMR (376.5 MHz, CDCl<sub>3</sub>): δ -63.3. HRMS (ESI) calcd. for C<sub>18</sub>H<sub>9</sub>F<sub>3</sub>O<sub>4</sub> (M+H)<sup>+</sup>: 347.0526, found: 347.0526.

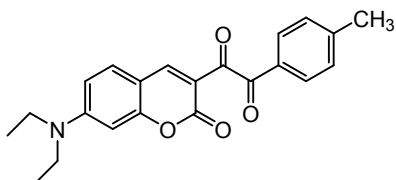

**1-(7-(diethylamino)-2-oxo-2*H*-chromen-3-yl)-2-(*p*-tolyl)ethane-1,2-dione (2y)**

Yellow solid (44.3 mg, 61%), mp. 180.3 - 182.1 °C. <sup>1</sup>H NMR (400 MHz, CDCl<sub>3</sub>): δ 8.51 (s, 1 H), 7.83 (d, *J* = 8.2 Hz, 2 H), 7.44 (d, *J* = 9.0 Hz, 1 H), 7.28 (d, *J* = 7.9 Hz, 2 H), 6.65 (dd, *J* = 2.4, 9.0 Hz, 1 H), 6.46 (d, *J* = 2.2 Hz, 1 H), 3.47 (q, *J* = 7.1 Hz, 4 H), 2.41 (s, 3 H), 1.25 (t, *J* = 7.2 Hz, 6 H). <sup>13</sup>C NMR (100 MHz, CDCl<sub>3</sub>): δ 193.7, 192.3, 160.4, 159.3, 153.9, 148.3, 145.0, 132.6, 130.6, 129.6, 129.5, 113.1, 110.3, 108.5, 97.1, 45.3, 21.9, 12.5. HRMS (ESI) calcd. for C<sub>22</sub>H<sub>21</sub>NO<sub>4</sub> (M+Na)<sup>+</sup>: 386.1363, found: 386.1362.

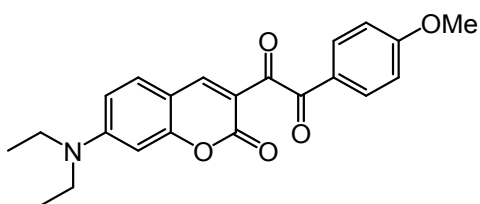

**1-(7-(diethylamino)-2-oxo-2*H*-chromen-3-yl)-2-(*p*-tolyl)ethane-1,2-dione (2z)**

Yellow solid (50.6 mg, 67%), mp. 187.5 - 189.7 °C. <sup>1</sup>H NMR (400 MHz, CDCl<sub>3</sub>): δ 8.51 (s, 1 H), 7.94 - 7.89 (m, 2 H), 7.44 (d, *J* = 9.0 Hz, 1 H), 7.00 - 6.93 (m, 2 H), 6.65 (dd, *J* = 2.4, 9.0 Hz, 1 H), 6.47 (d, *J* = 2.2 Hz, 1 H), 3.87 (s, 3 H), 3.48 (q, *J* = 7.1 Hz, 4 H), 1.25 (t, *J* = 7.1 Hz, 6 H). <sup>13</sup>C NMR (100 MHz, CDCl<sub>3</sub>): δ 192.7, 192.3, 164.3, 160.4, 159.3, 153.9, 148.4, 132.6, 131.9, 126.1, 114.2, 113.1, 110.3, 108.5, 97.1, 55.6, 45.4, 12.5. HRMS (ESI) calcd. for C<sub>22</sub>H<sub>21</sub>NO<sub>5</sub> (M+H)<sup>+</sup>: 380.1492, found: 380.1496.

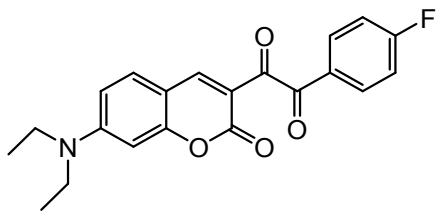

**1-(2-oxo-2H-chromen-3-yl)-2-(4-(trifluoromethyl)phenyl)ethane-1,2-dione (2aa)**

Yellow solid (22.9 mg, 31%), mp. 218.3 - 219.4 °C. <sup>1</sup>H NMR (400 MHz, CDCl<sub>3</sub>): δ 8.51 (s, 1 H), 8.01 - 7.93 (m, 2 H), 7.46 (d, *J* = 9.0 Hz, 1 H), 7.20 - 7.12 (m, 2 H), 6.66 (dd, *J* = 2.4, 9.0 Hz, 1 H), 6.47 (d, *J* = 2.3 Hz, 1 H), 3.49 (q, *J* = 7.1 Hz, 4 H), 1.26 (t, *J* = 7.2 Hz, 6 H). <sup>13</sup>C NMR (100 MHz, CDCl<sub>3</sub>): δ 192.3, 191.9, 166.2 (d, *J* = 256.0 Hz), 160.6, 159.4, 154.0, 148.3, 132.7 (d, *J* = 9.54 Hz), 129.5 (d, *J* = 2.93 Hz), 116.05 (d, *J* = 22.0 Hz), 112.8, 110.4, 108.6, 97.2, 45.4, 12.5. <sup>19</sup>F NMR (376.5 MHz, CDCl<sub>3</sub>): δ -103.4. HRMS (ESI) calcd. for C<sub>21</sub>H<sub>18</sub>FNO<sub>4</sub> (M+Na)<sup>+</sup>: 390.1112, found: 390.1113.

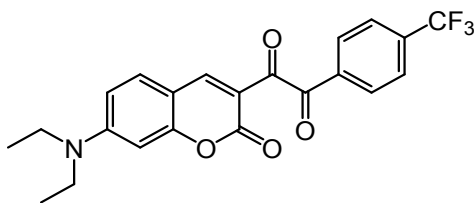

**1-(7-(diethylamino)-2-oxo-2H-chromen-3-yl)-2-(4-(trifluoromethyl)phenyl)ethane-1,2-dione (2ab)**

Yellow solid (28.1 mg, 34%), mp. 191.5 - 193.7 °C. <sup>1</sup>H NMR (400 MHz, CDCl<sub>3</sub>): δ 8.53 (s, 1 H), 8.07 - 8.02 (m, *J* = 8.1 Hz, 2 H), 7.77 - 7.73 (m, *J* = 8.2 Hz, 2 H), 7.48 (d, *J* = 9.0 Hz, 1 H), 6.68 (dd, *J* = 2.4, 9.0 Hz, 1 H), 6.48 (d, *J* = 2.3 Hz, 1 H), 3.49 (q, *J* = 7.1 Hz, 4 H), 1.27 (t, *J* = 7.2 Hz, 6 H). <sup>13</sup>C NMR (100 MHz, CDCl<sub>3</sub>): δ 192.8, 191.5, 160.9, 159.4, 154.2, 148.3, 135.8, 134.9 (q, *J* = 33.0 Hz), 132.9, 129.7, 125.8 (q, *J* = 3.7 Hz), 123.6 (q, *J* = 272.9 Hz), 112.5, 110.6, 108.7, 97.2, 45.4, 12.5. <sup>19</sup>F NMR (376.5 MHz, CDCl<sub>3</sub>): δ -63.2. HRMS (ESI) calcd. for C<sub>22</sub>H<sub>18</sub>F<sub>3</sub>NO<sub>4</sub> (M+H)<sup>+</sup>: 418.1261, found: 418.1261.

## 9. NMR spectra of all compounds

XJH-170A-2,1H,718\_000001r

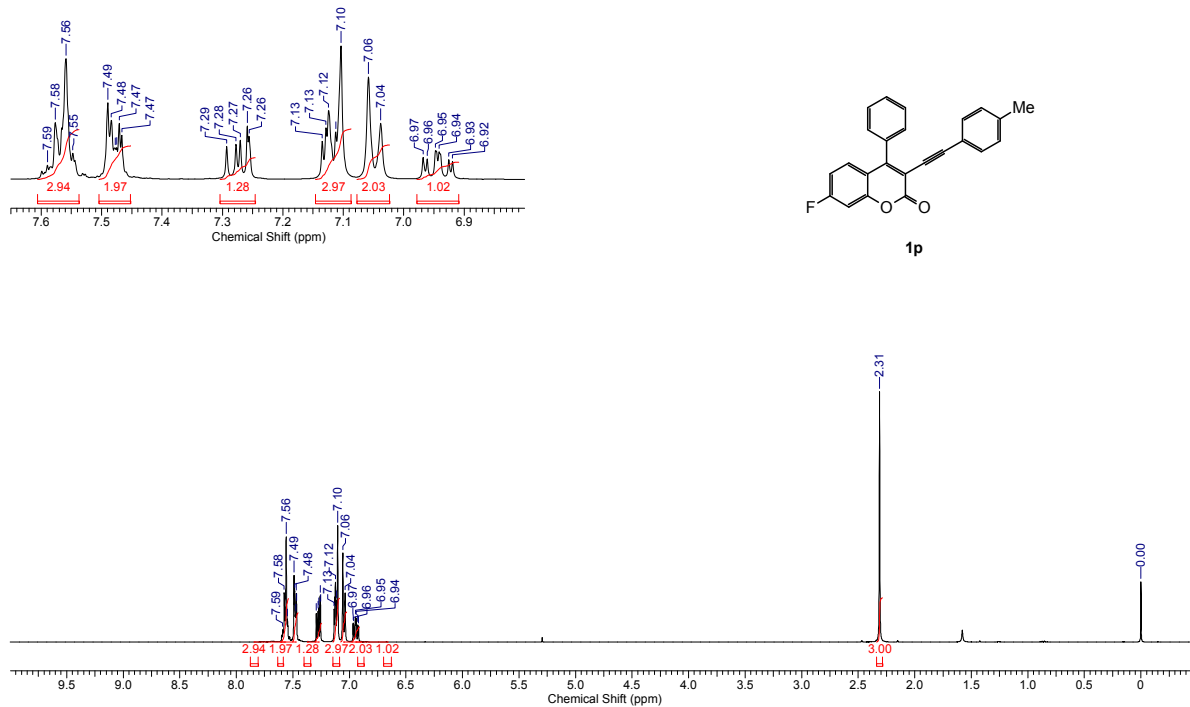

Figure S17. <sup>1</sup>H NMR spectrum of compound 1p

XJH-170-2,13C,650\_000001r

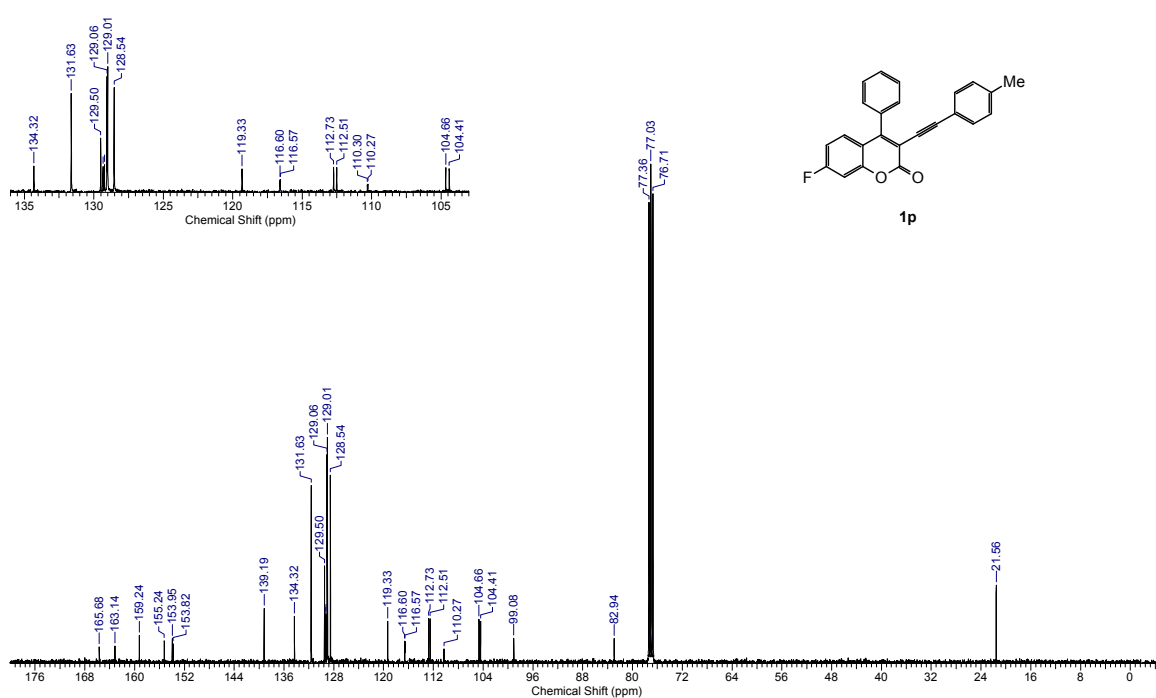

Figure S18. <sup>13</sup>C NMR spectrum of compound 1p

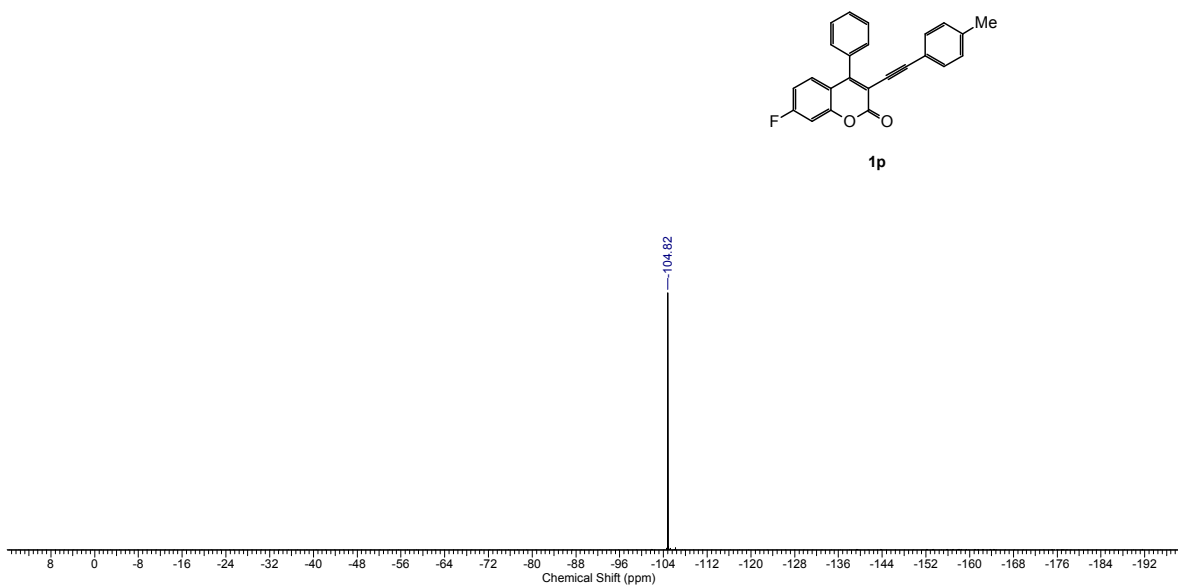Figure S19.  $^{19}\text{F}$  NMR spectrum of compound **1p**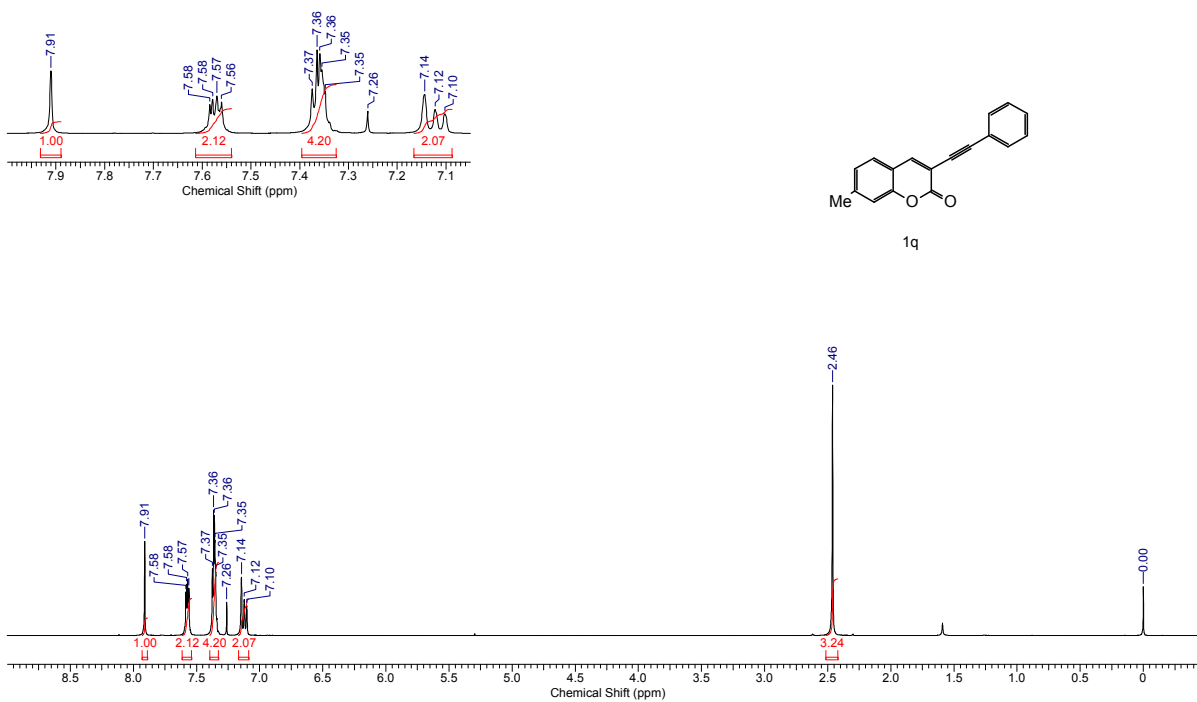Figure S20.  $^1\text{H}$  NMR spectrum of compound **1q**

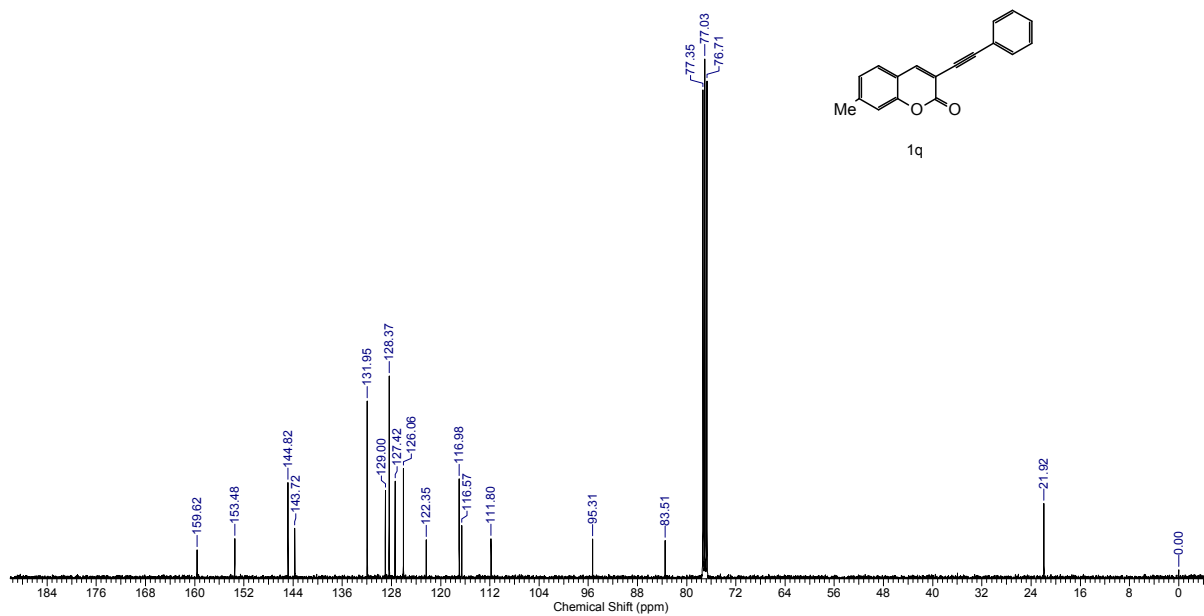Figure S21.  $^{13}\text{C}$  NMR spectrum of compound 1q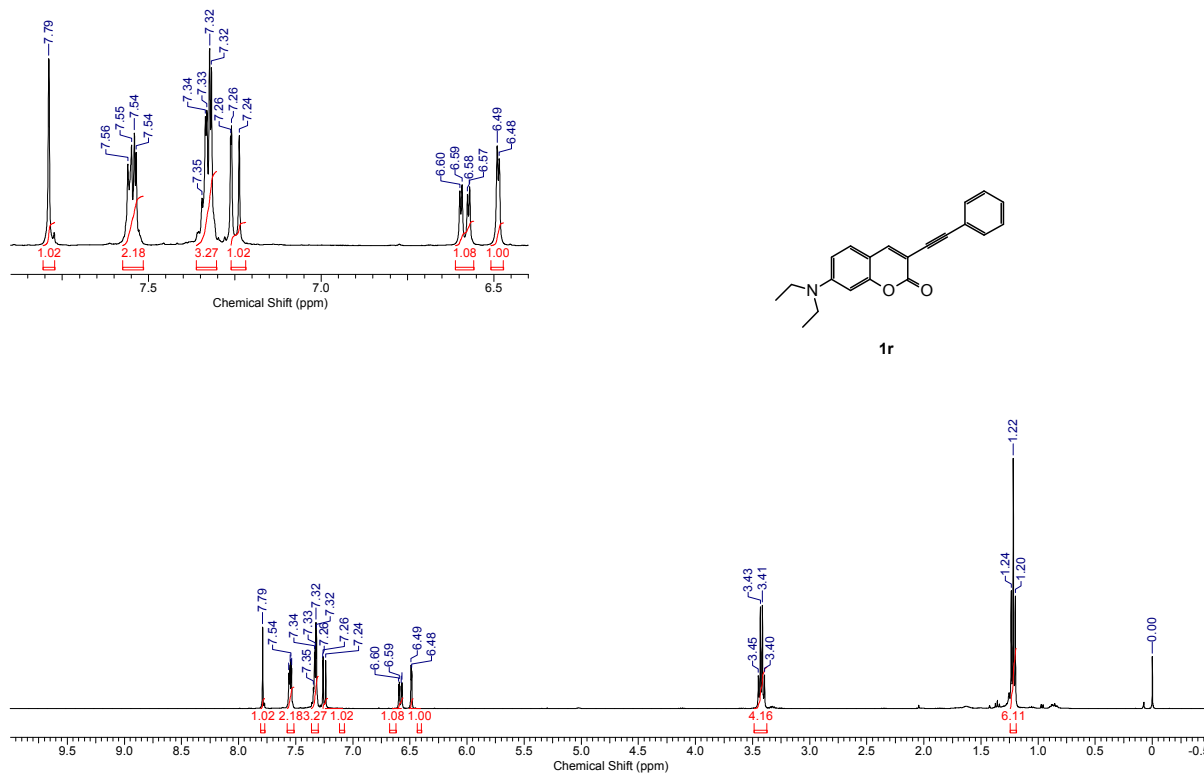Figure S22.  $^1\text{H}$  NMR spectrum of compound 1r

XJH-198-2,13C,5201\_000001r

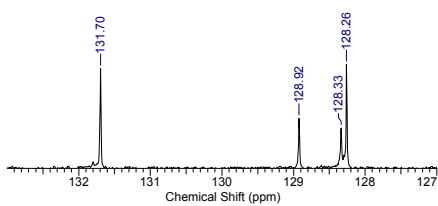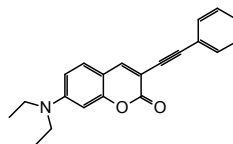

1r

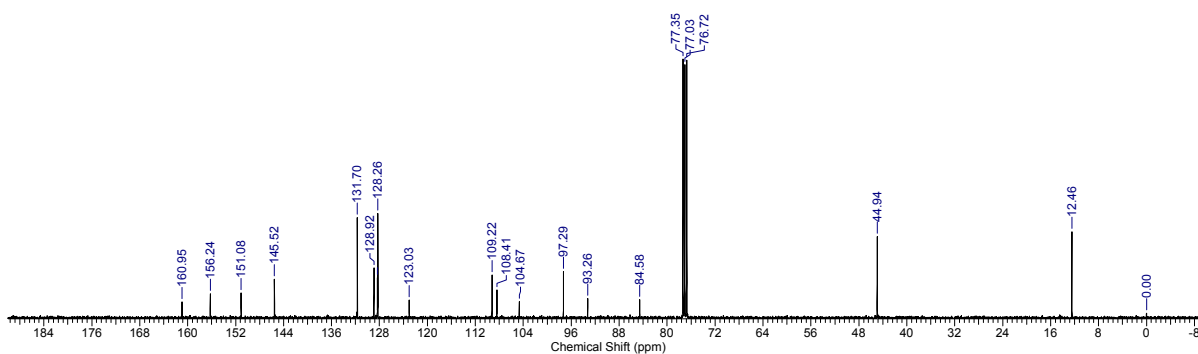

Figure S23. <sup>13</sup>C NMR spectrum of compound 1r

20-W-HMM-12.28\_9810001r

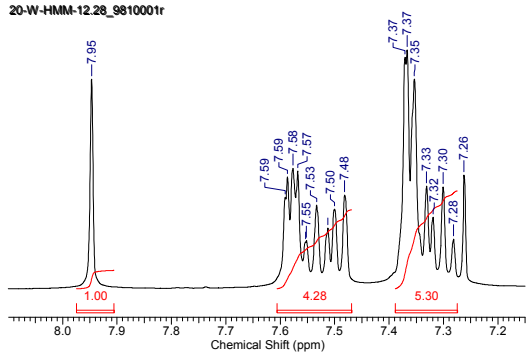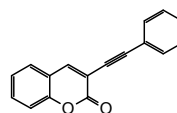

1s

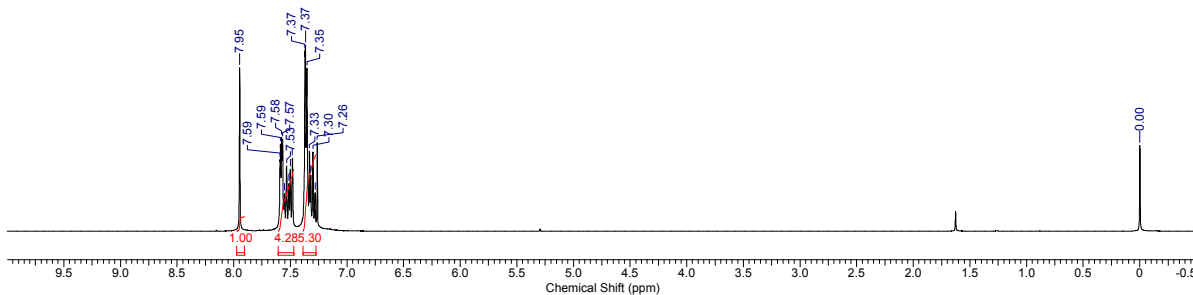

Figure S24. <sup>1</sup>H NMR spectrum of compound 1s



XJH-136,13G,427\_000001r

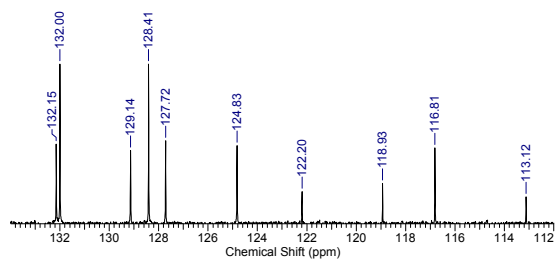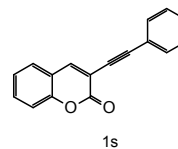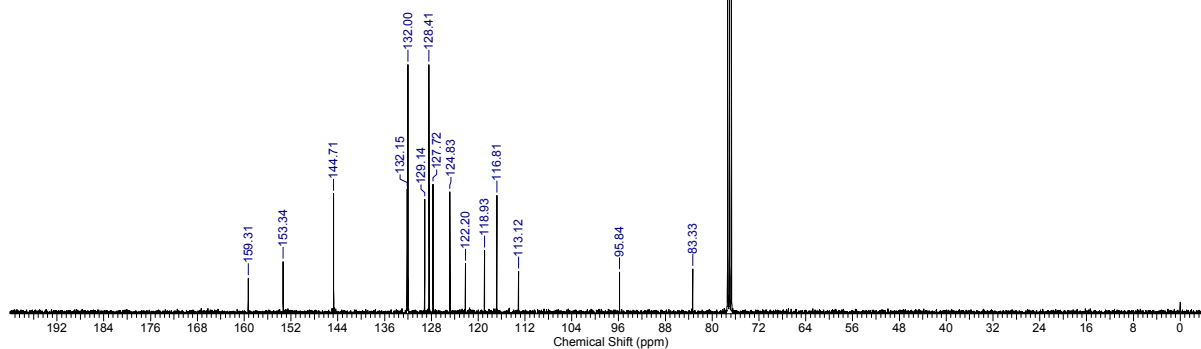

Figure S25. <sup>13</sup>C NMR spectrum of compound 1s

XJH-197-2,1H,5110\_000001r

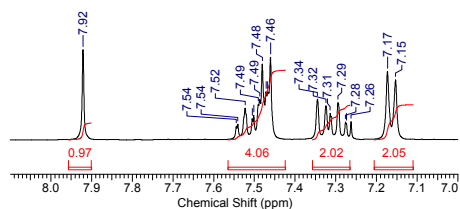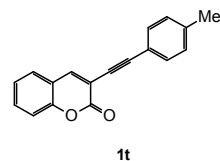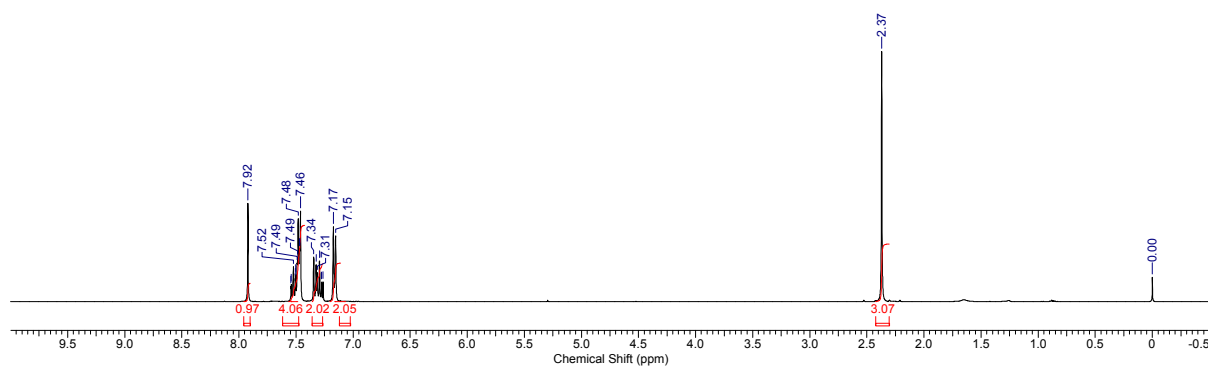

Figure S26. <sup>1</sup>H NMR spectrum of compound 1t

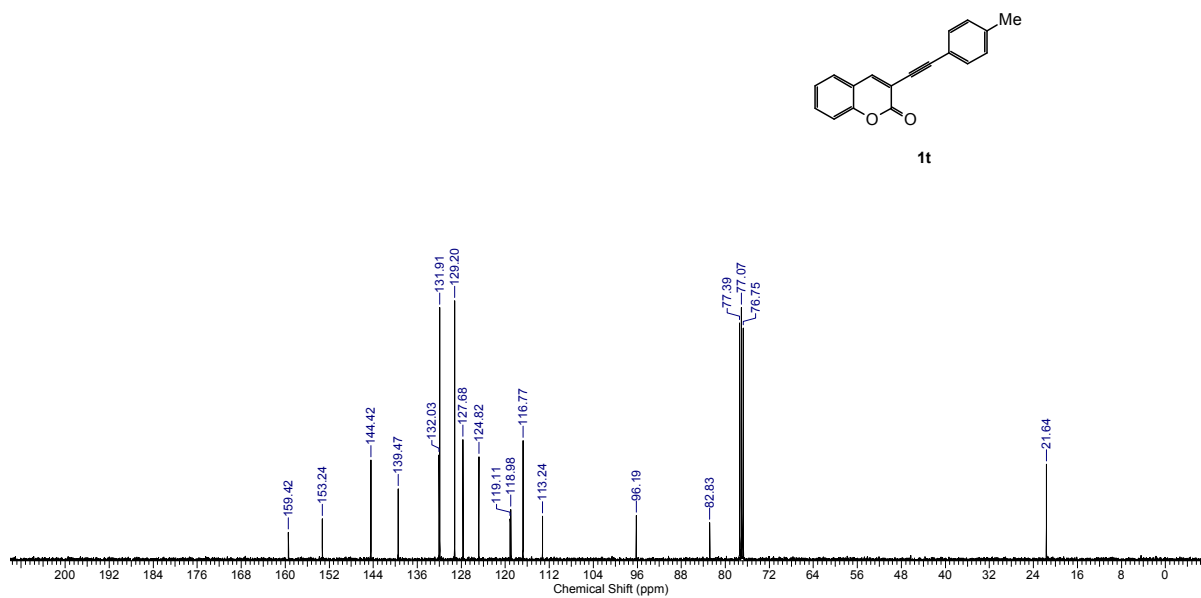Figure S27. <sup>13</sup>C NMR spectrum of compound **1t**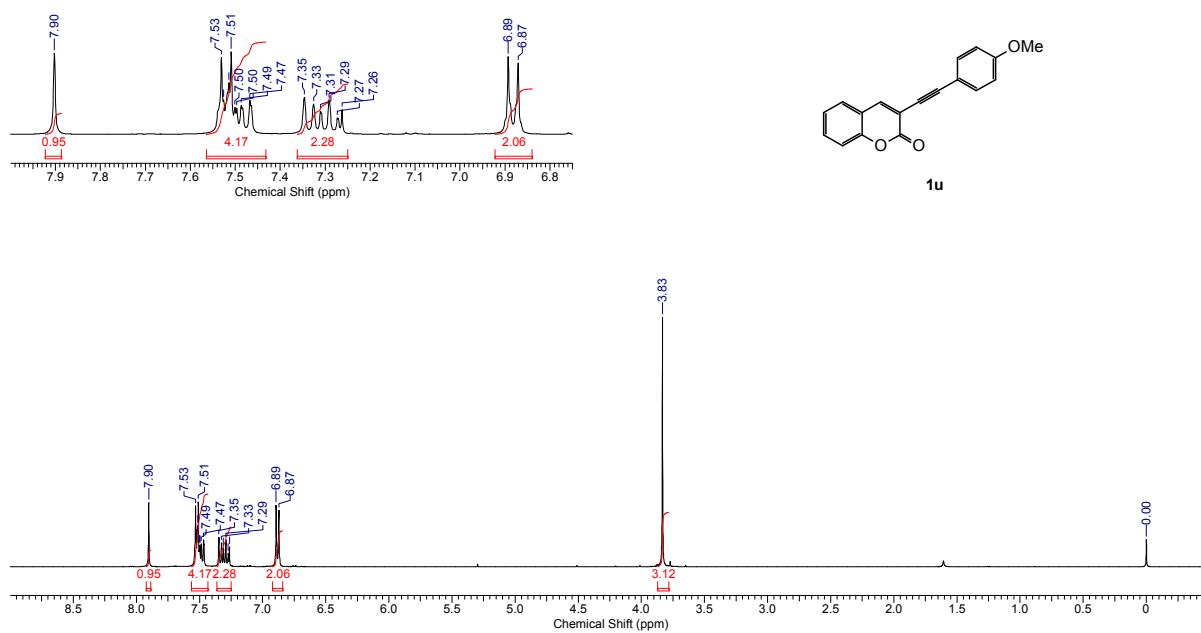Figure S28. <sup>1</sup>H NMR spectrum of compound **1u**

XJH-159.13C.724\_000001r

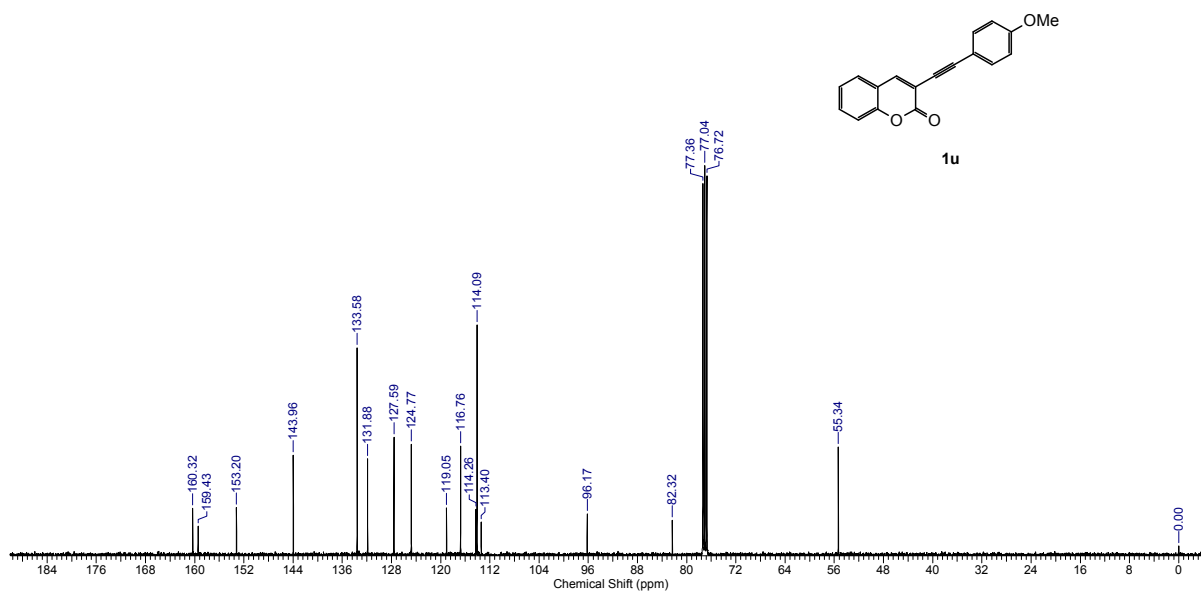

**Figure S29.** <sup>13</sup>C NMR spectrum of compound **1u**

XJH-137.1H.734\_000001r

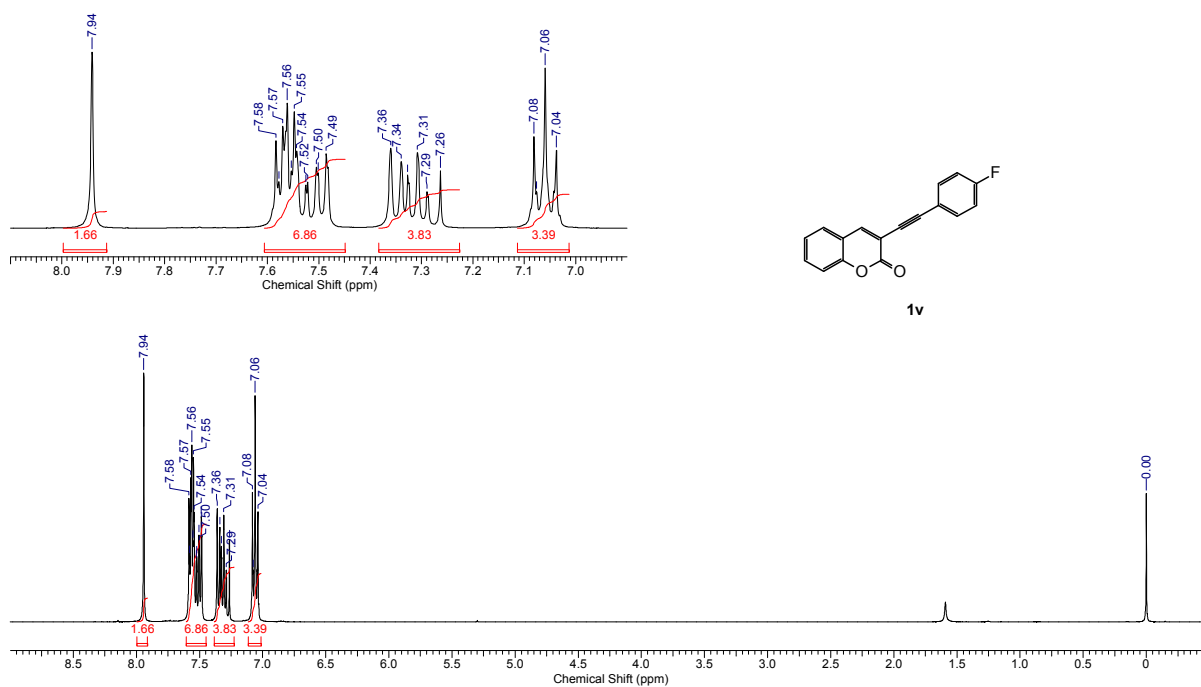

**Figure S30.** <sup>1</sup>H NMR spectrum of compound **1v**

XJH-137,13C,743\_000001r

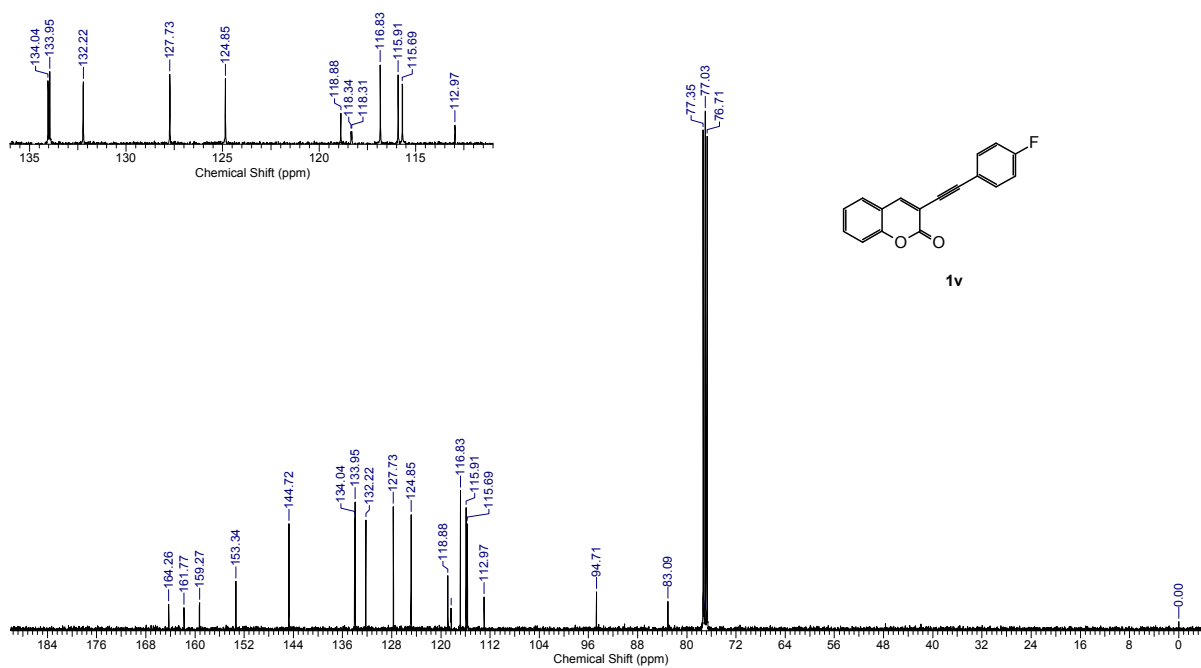

Figure S31. <sup>13</sup>C NMR spectrum of compound 1v

XJH-137,19F,739\_000001r

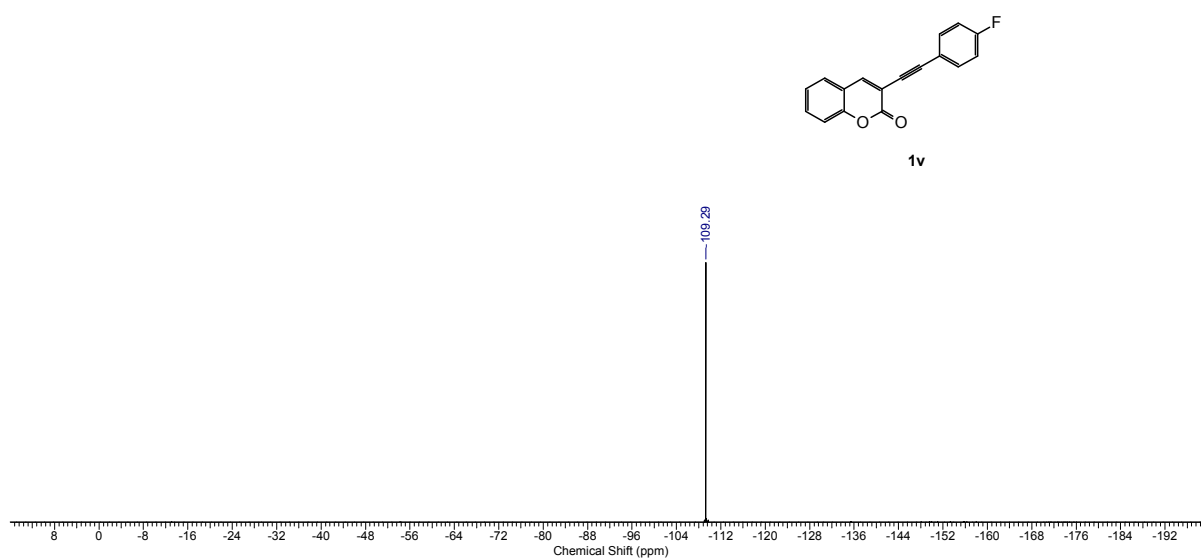

Figure S32. <sup>19</sup>F NMR spectrum of compound 1v

XJH-196-2,1H,5100\_000001r

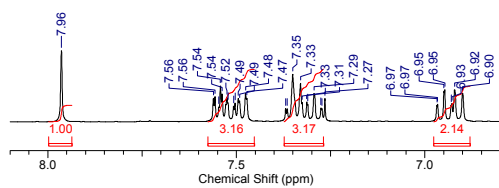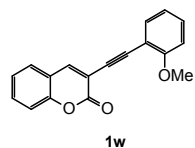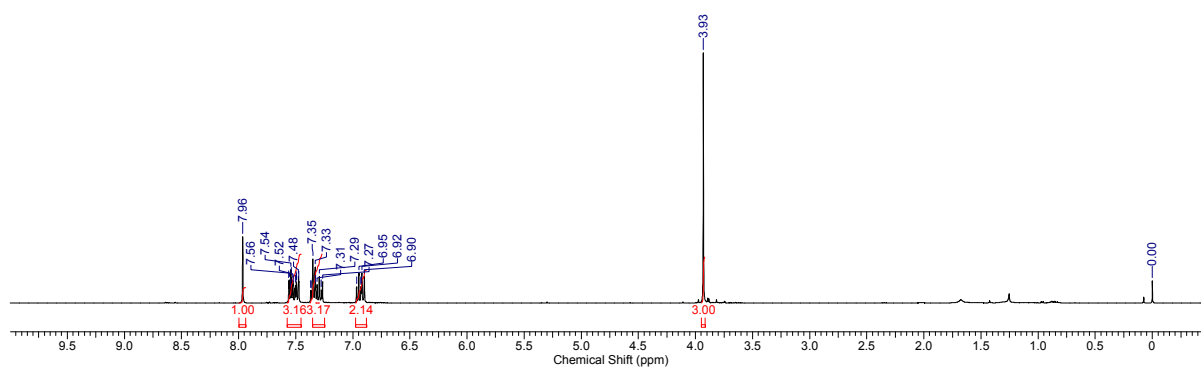

Figure S33. <sup>1</sup>H NMR spectrum of compound **1w**

XJH-196-2,13C,5101\_000001r

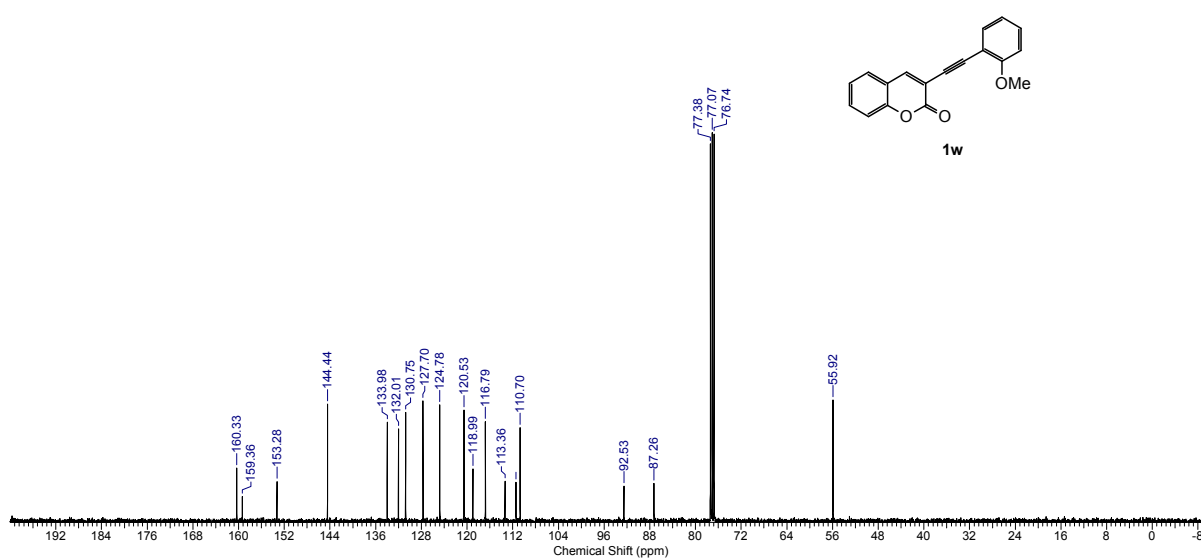

Figure S34. <sup>13</sup>C NMR spectrum of compound **1w**

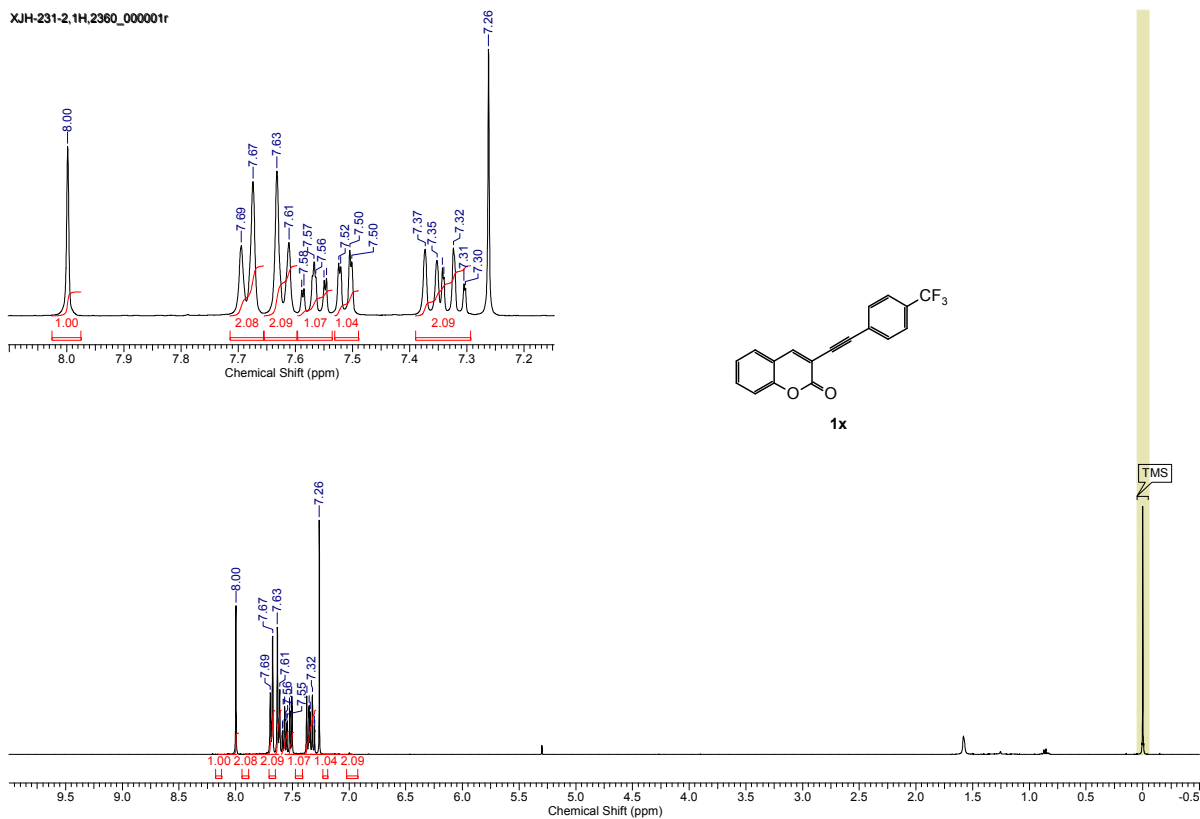

Figure S35.  $^1\text{H}$  NMR spectrum of compound **1x**

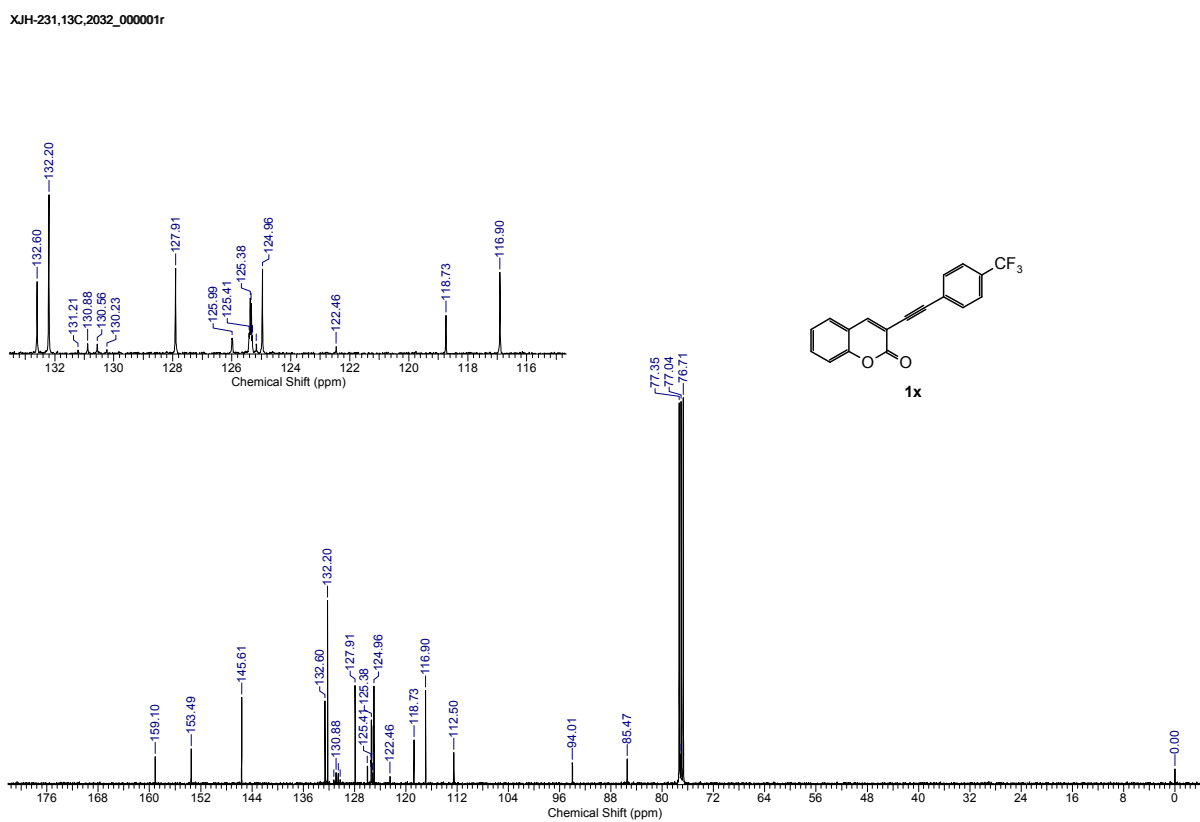

Figure S36.  $^{13}\text{C}$  NMR spectrum of compound **1x**

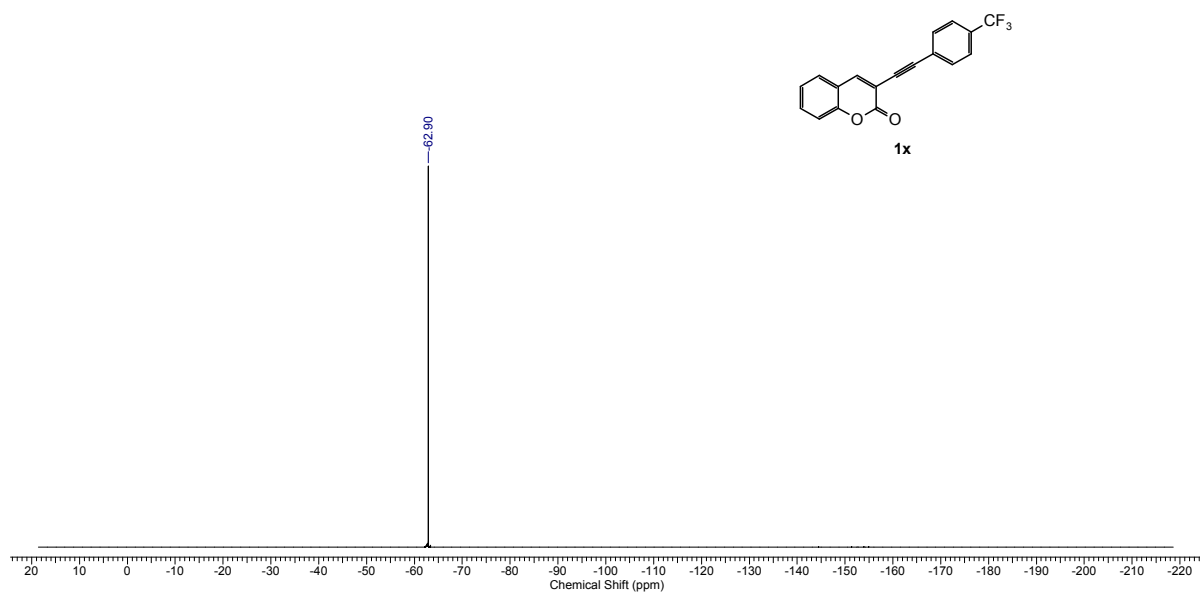Figure S37. <sup>19</sup>F NMR spectrum of compound **1x**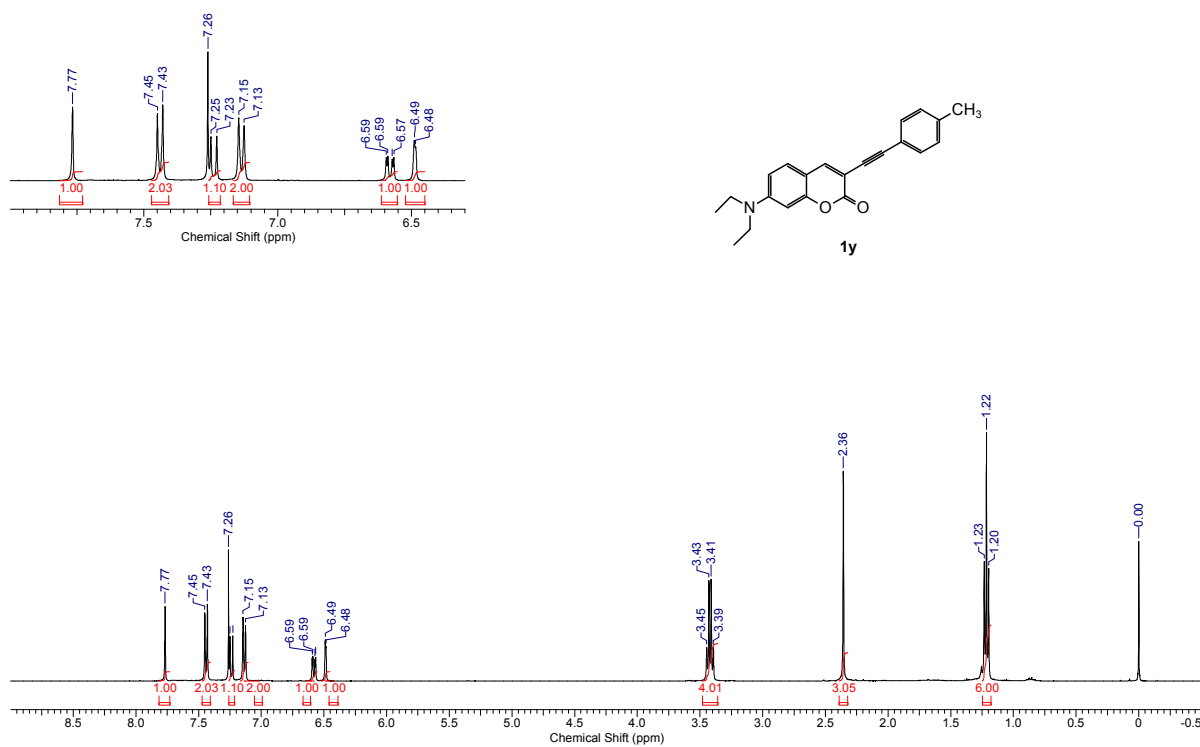Figure S38. <sup>1</sup>H NMR spectrum of compound **1y**

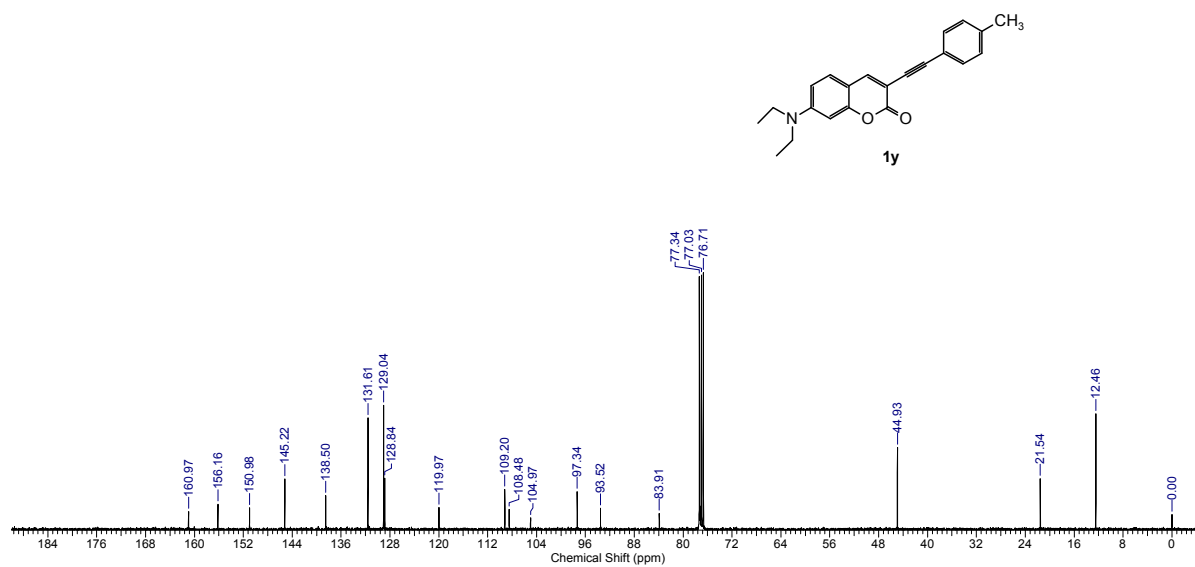Figure S39. <sup>13</sup>C NMR spectrum of compound **1y**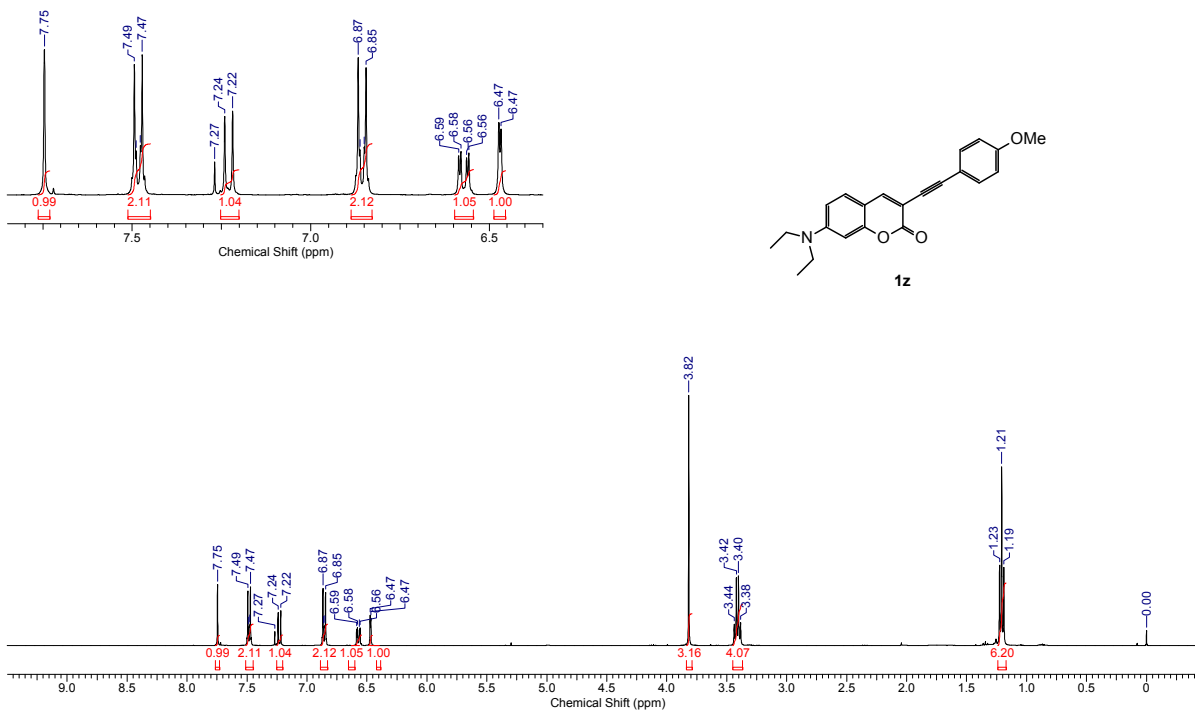Figure S40. <sup>1</sup>H NMR spectrum of compound **1z**



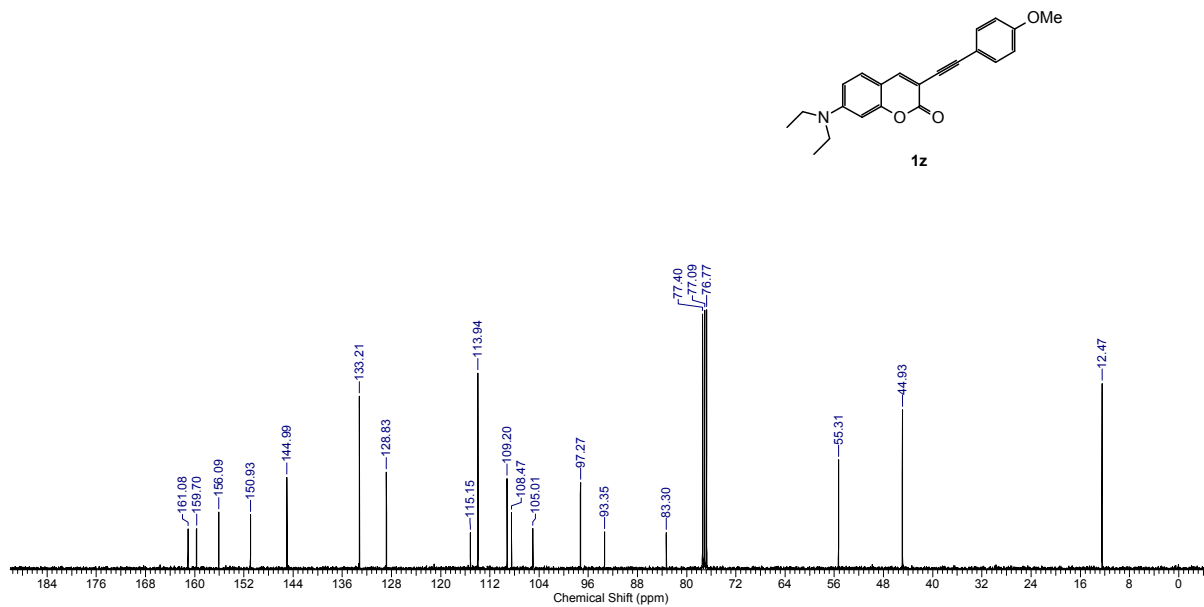Figure S41. <sup>13</sup>C NMR spectrum of compound **1z**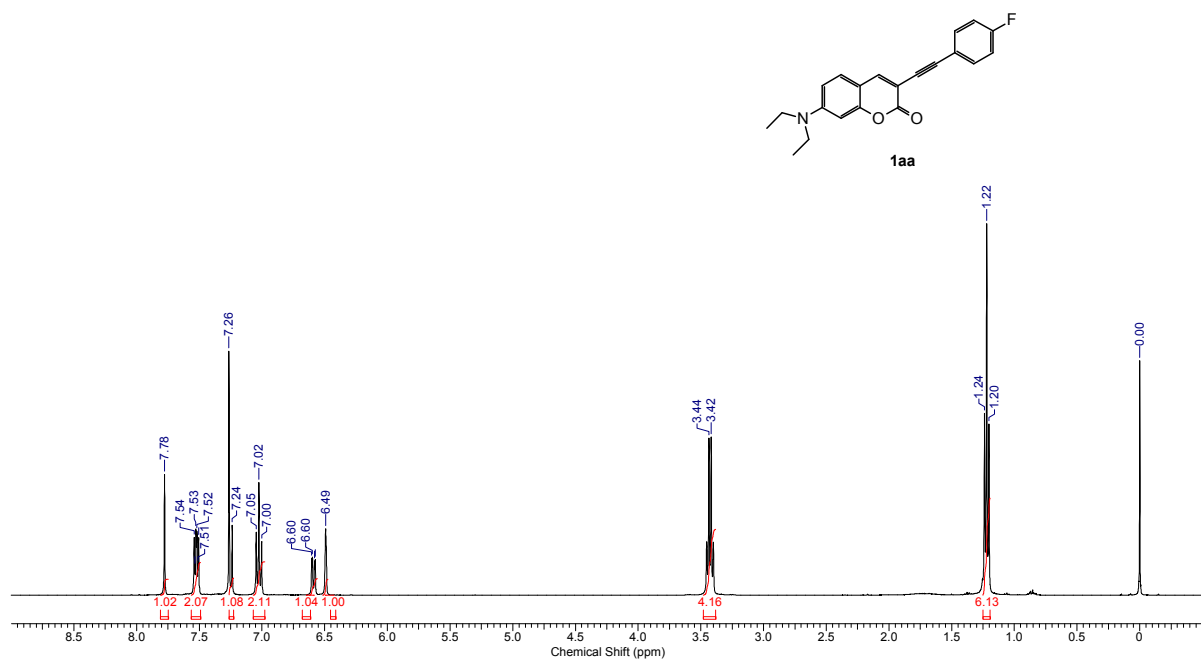Figure S42. <sup>1</sup>H NMR spectrum of compound **1aa**

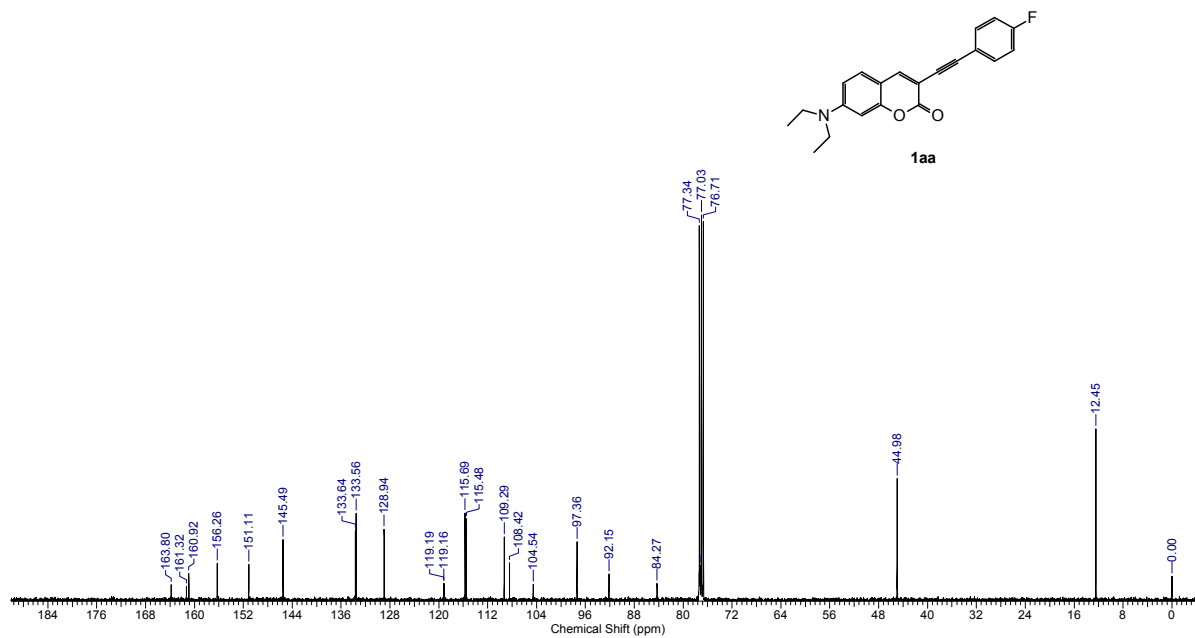

Figure S43. <sup>13</sup>C NMR spectrum of compound **1aa**

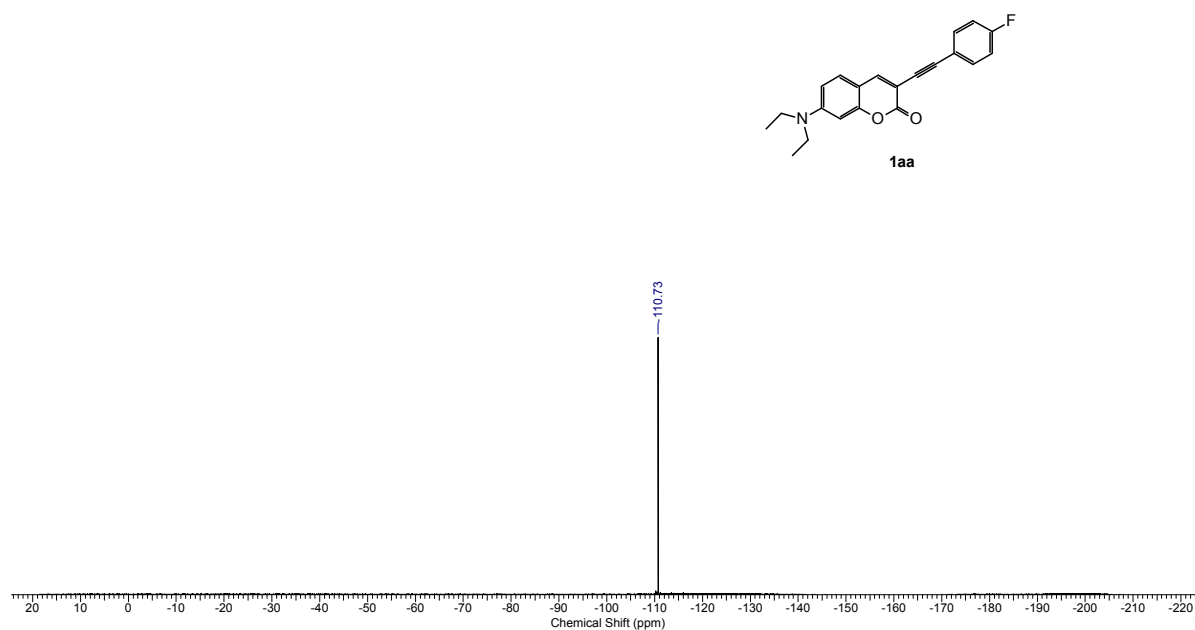

Figure S44. <sup>1</sup>H NMR spectrum of compound **1aa**

XJH-214-2.1H,6290\_000001r

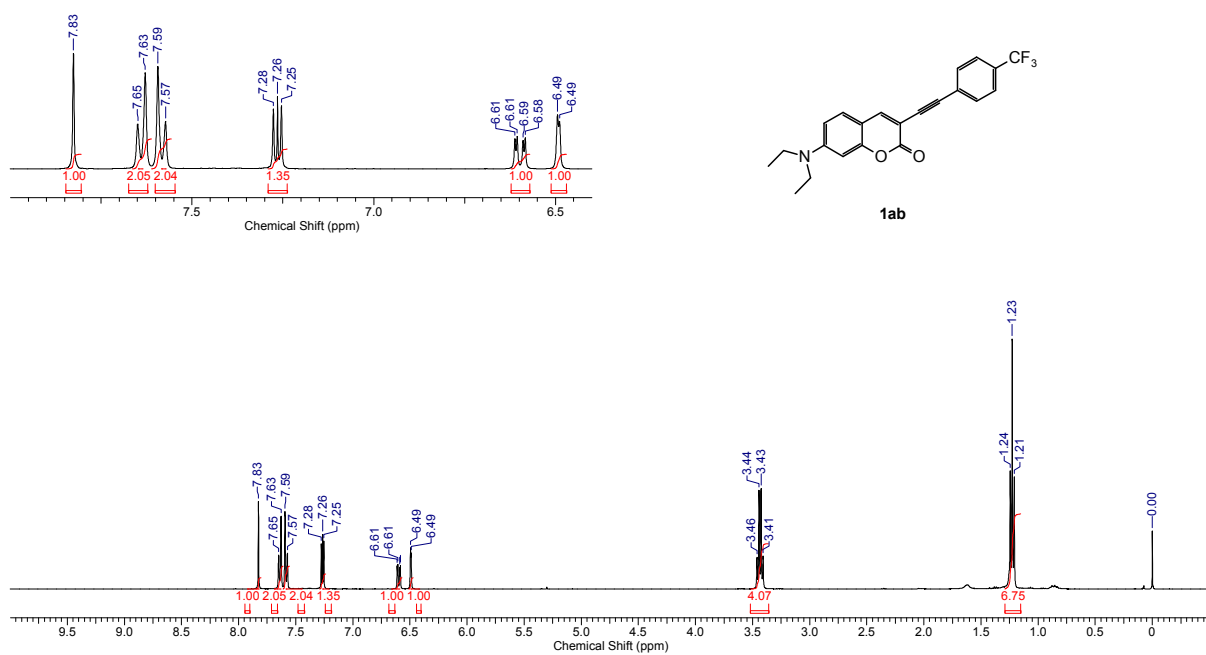

Figure S45. <sup>1</sup>H NMR spectrum of compound 1ab

XJH-214-2.13C,6601\_000001r

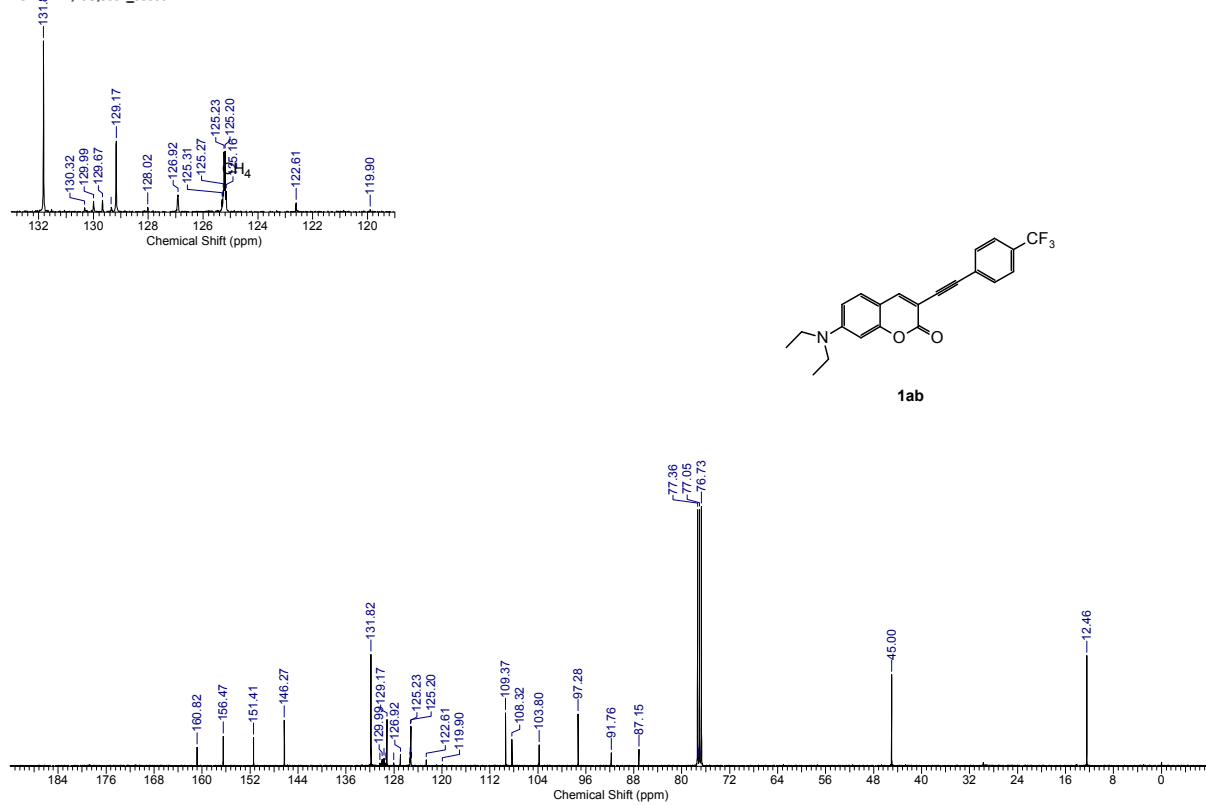

Figure S46. <sup>13</sup>C NMR spectrum of compound 1ab

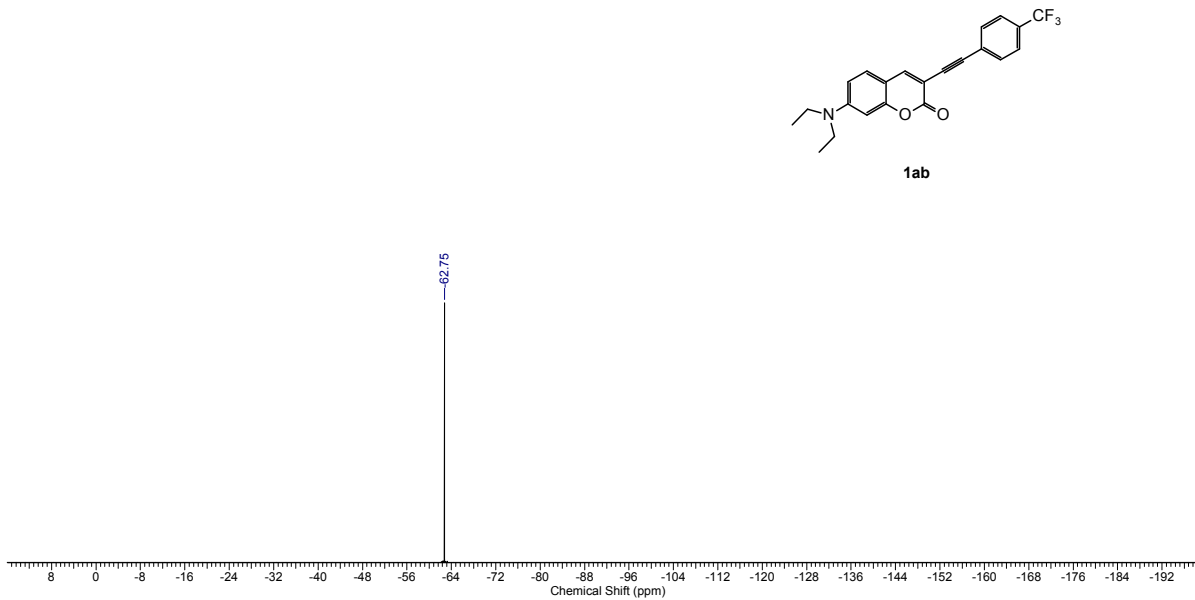Figure S47. <sup>19</sup>F NMR spectrum of compound **1ab**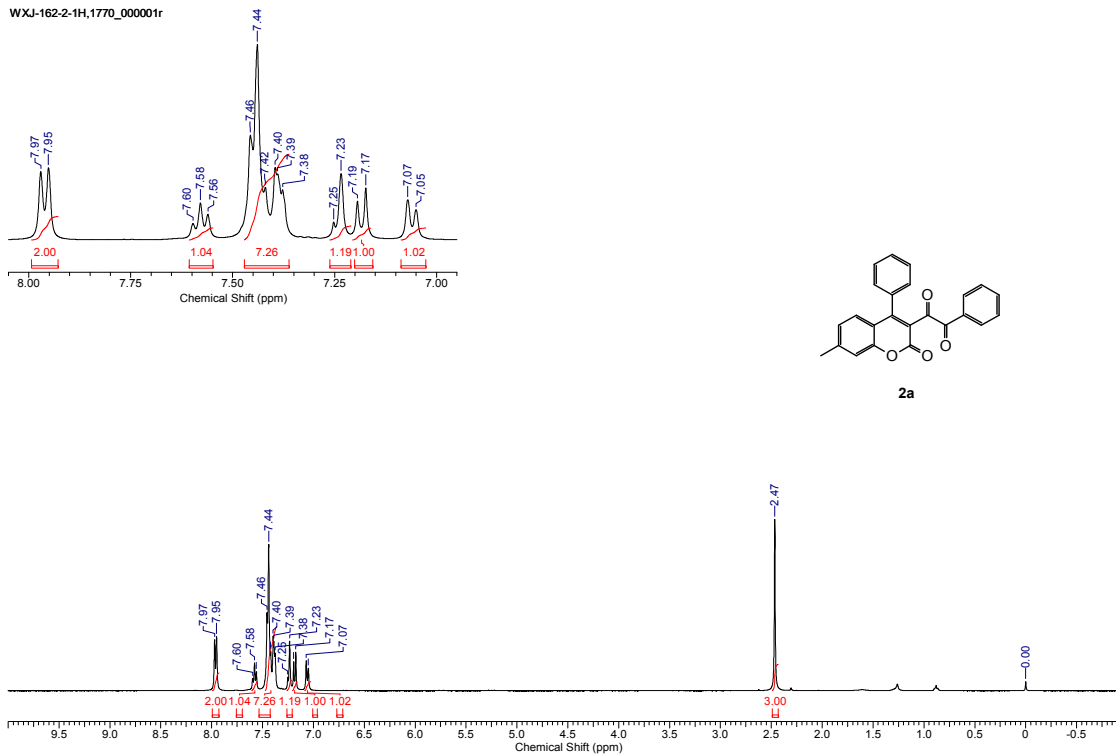Figure S48. <sup>1</sup>H NMR spectrum of compound **2a**

WXJ-162-2-13C,1771\_000001r

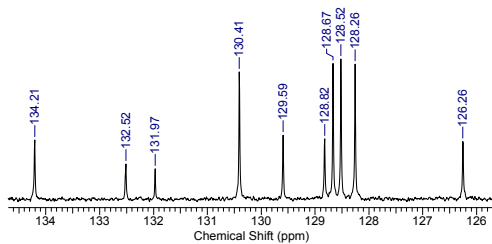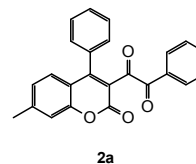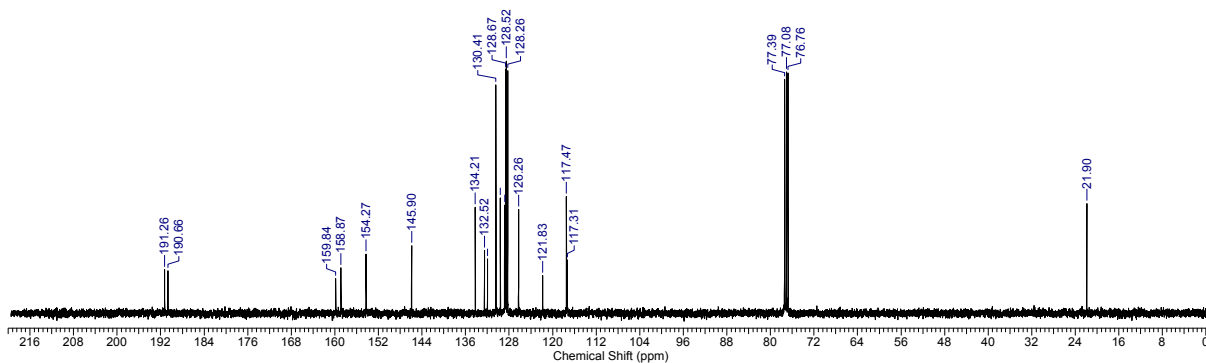

Figure S49. <sup>13</sup>C NMR spectrum of compound 2a

WXJ-285-1H,13470\_000001r

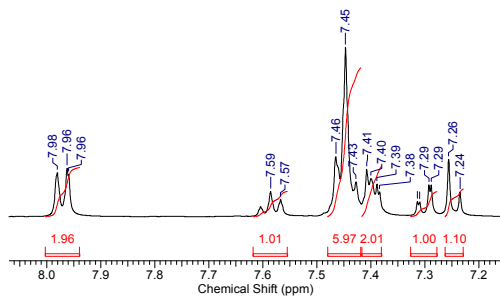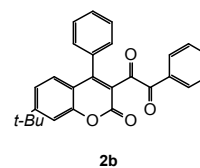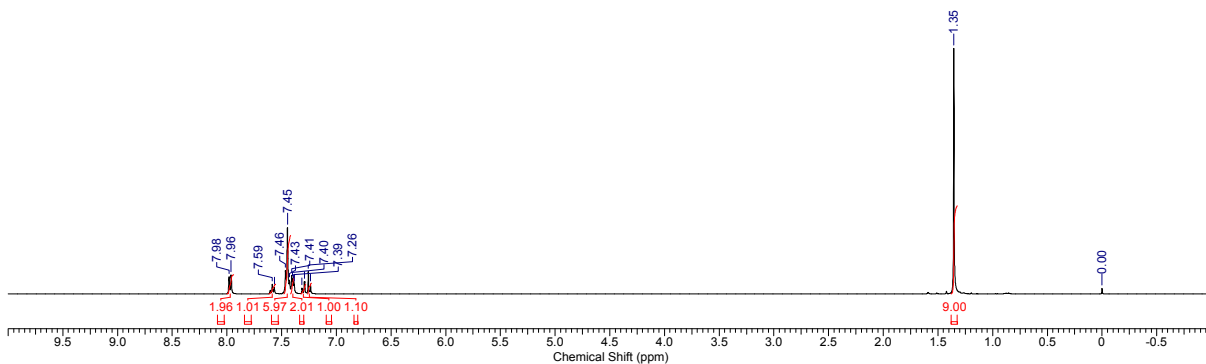

Figure S50. <sup>1</sup>H NMR spectrum of compound 2b

WXJ-285-13C,13471\_000001r

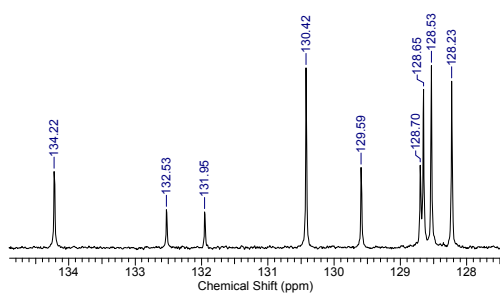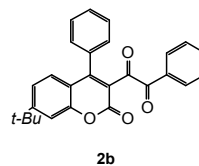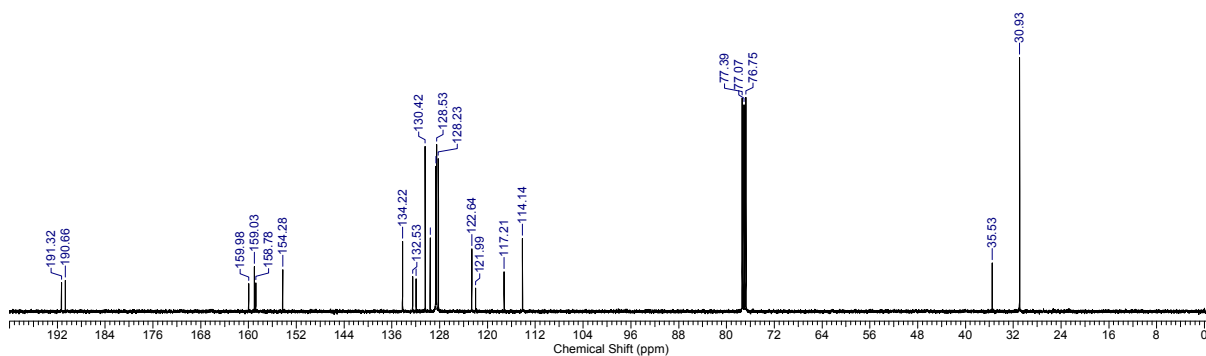

Figure S51. <sup>13</sup>C NMR spectrum of compound 2b

WXJ-284-1H,13490\_000001r

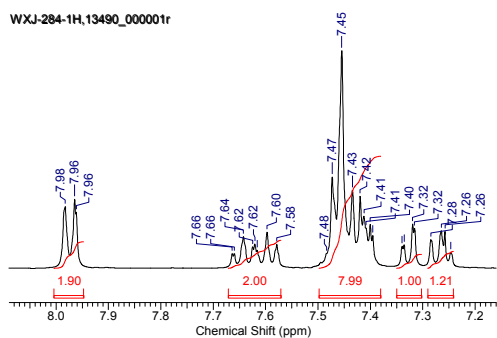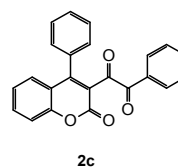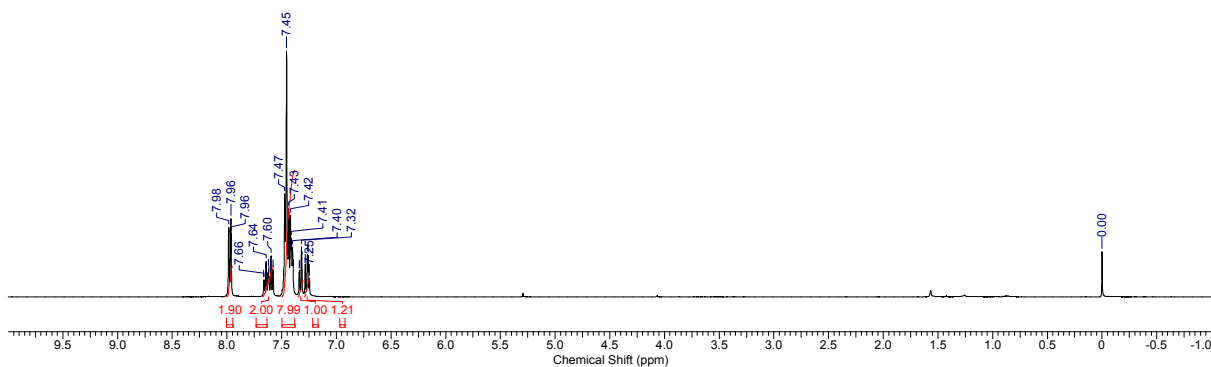

Figure S52. <sup>1</sup>H NMR spectrum of compound 2c

WXJ-284-13C,13071\_000001r

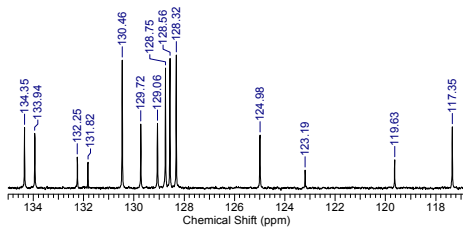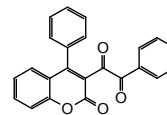

2c

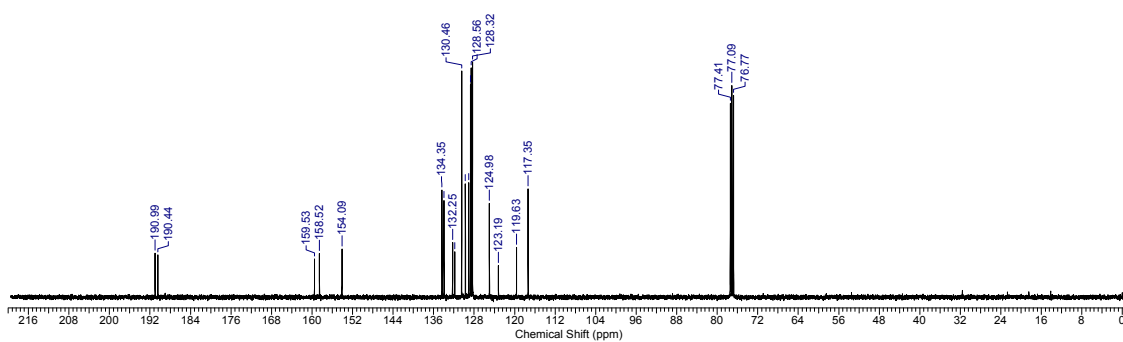

Figure S53. <sup>13</sup>C NMR spectrum of compound 2c

XJH-W-289,1H,8830\_000001r

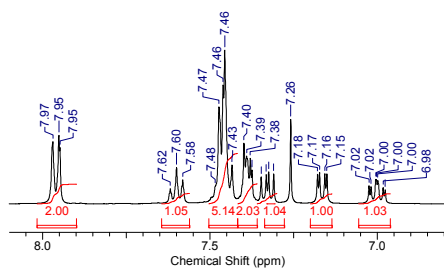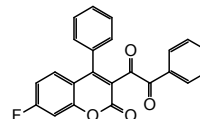

2d

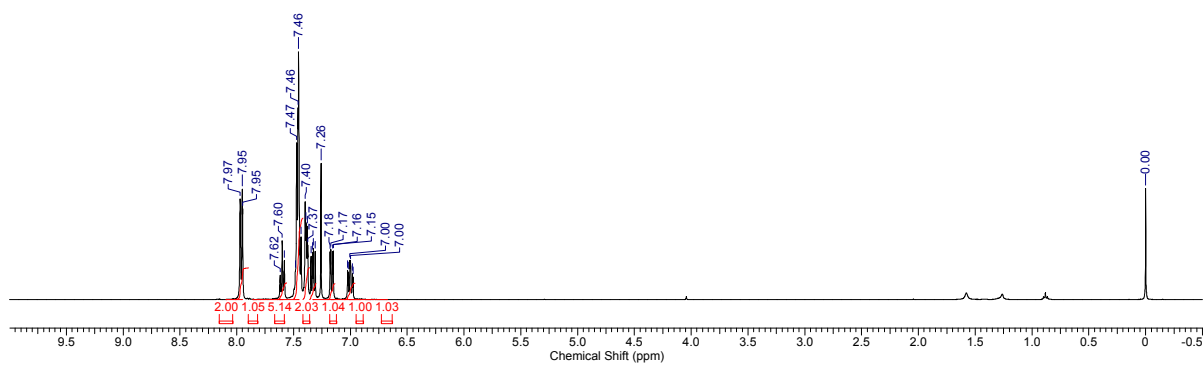

Figure S54. <sup>1</sup>H NMR spectrum of compound 2d

XJH-W-289,13C,8381\_000001r

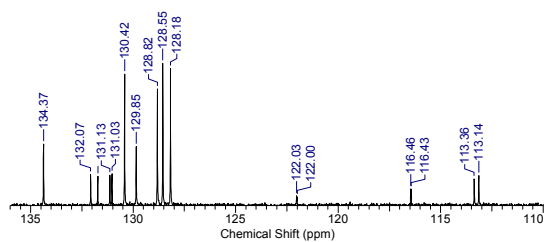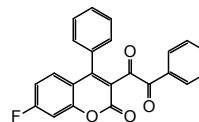

2d

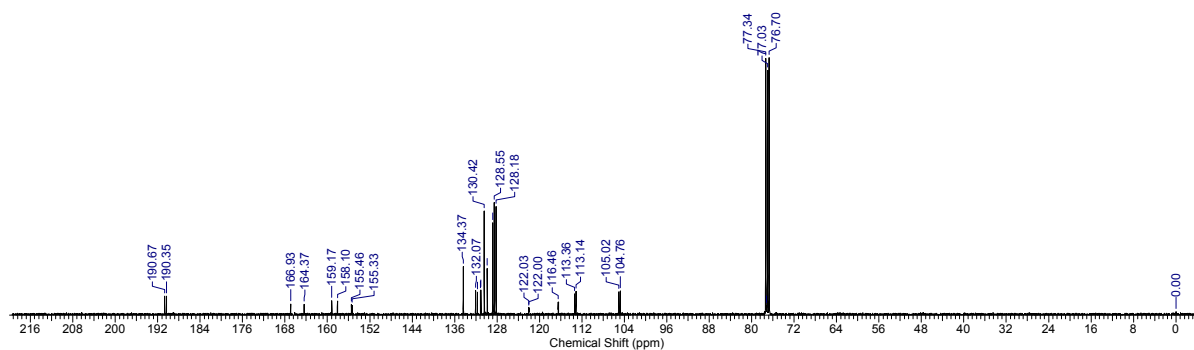

Figure S55.  $^{13}\text{C}$  NMR spectrum of compound 2d

XJH-W-289,19F,8382\_000001r

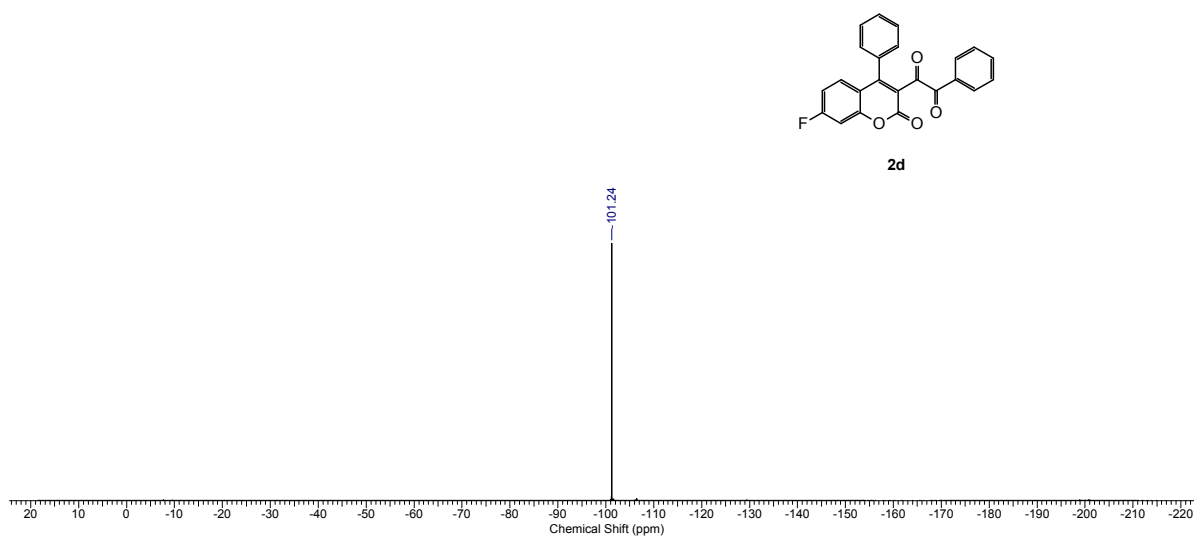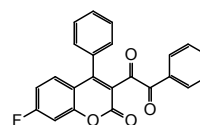

2d

Figure S56.  $^{19}\text{F}$  NMR spectrum of compound 2d



WXJ-288-1H,15390\_000001r

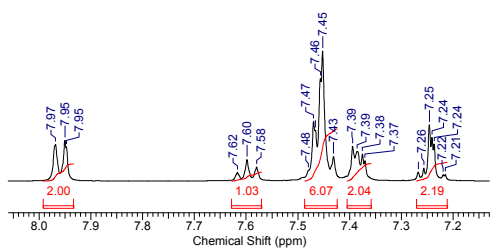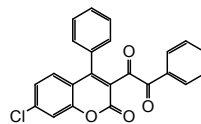

2e

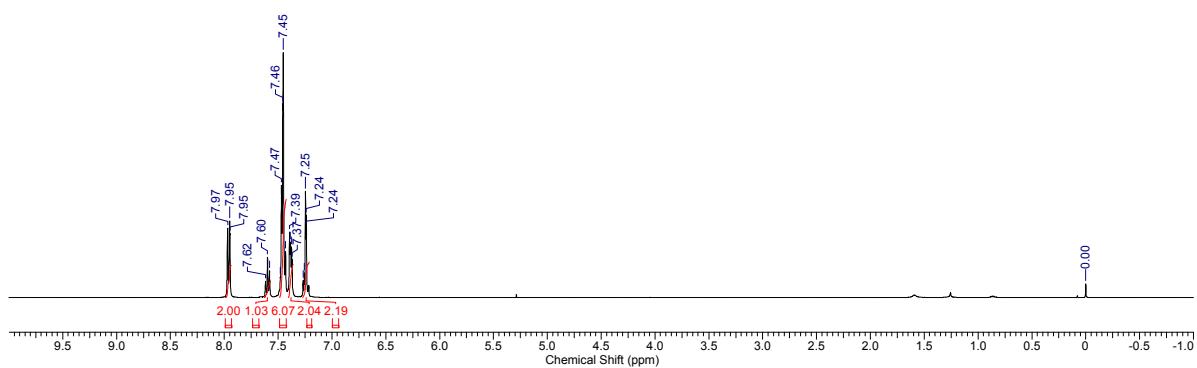

Figure S57. <sup>1</sup>H NMR spectrum of compound 2e

WXJ-288-13C,14531\_000001r

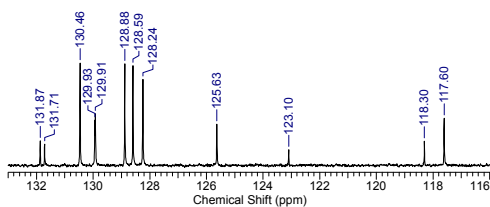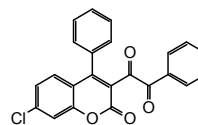

2e

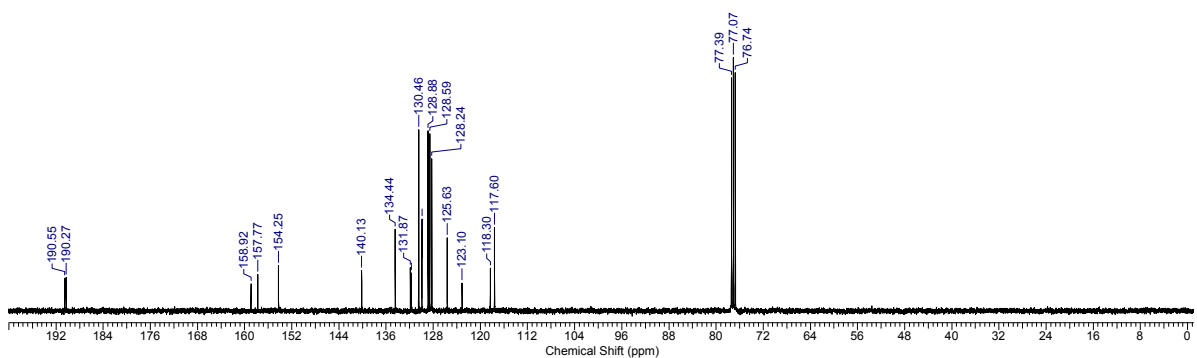

Figure S58. <sup>13</sup>C NMR spectrum of compound 2e

XJH-W-281,1H,8840\_000001r

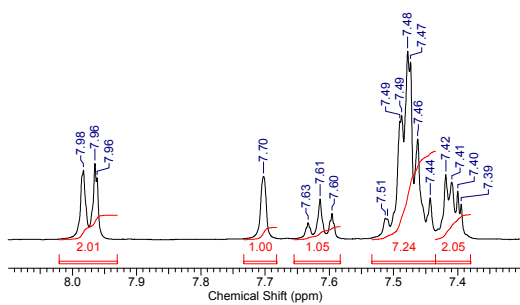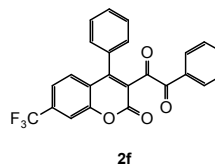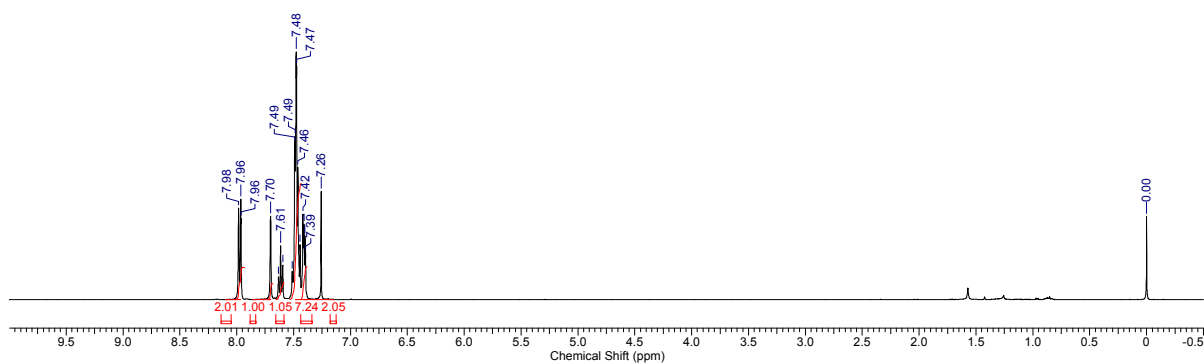

Figure S59. <sup>1</sup>H NMR spectrum of compound **2f**

2F-XJH-W-281,13C,8392\_000001r

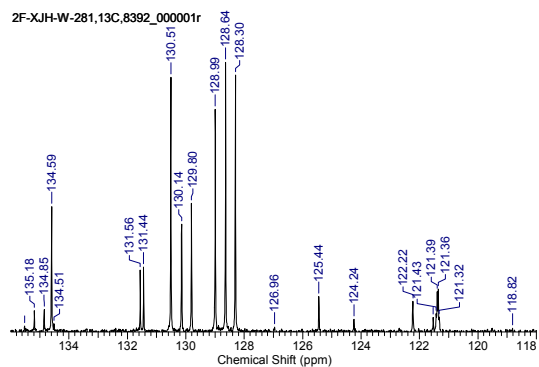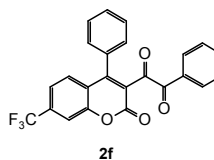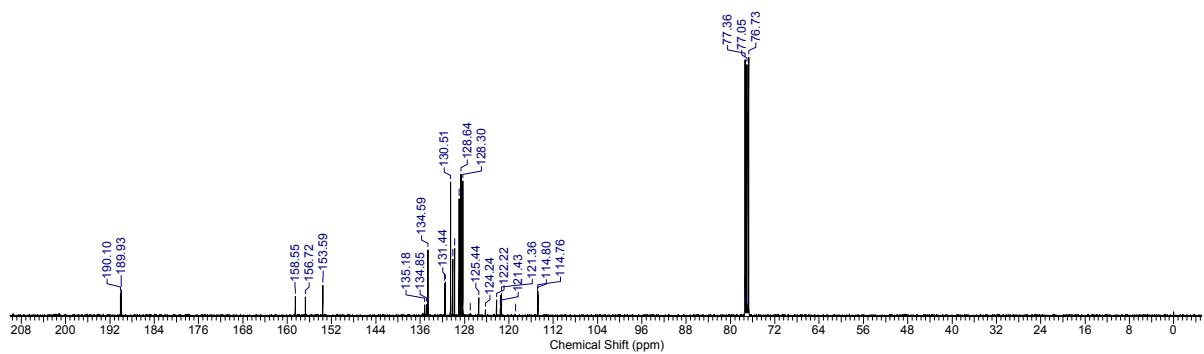

Figure S60. <sup>13</sup>C NMR spectrum of compound **2f**

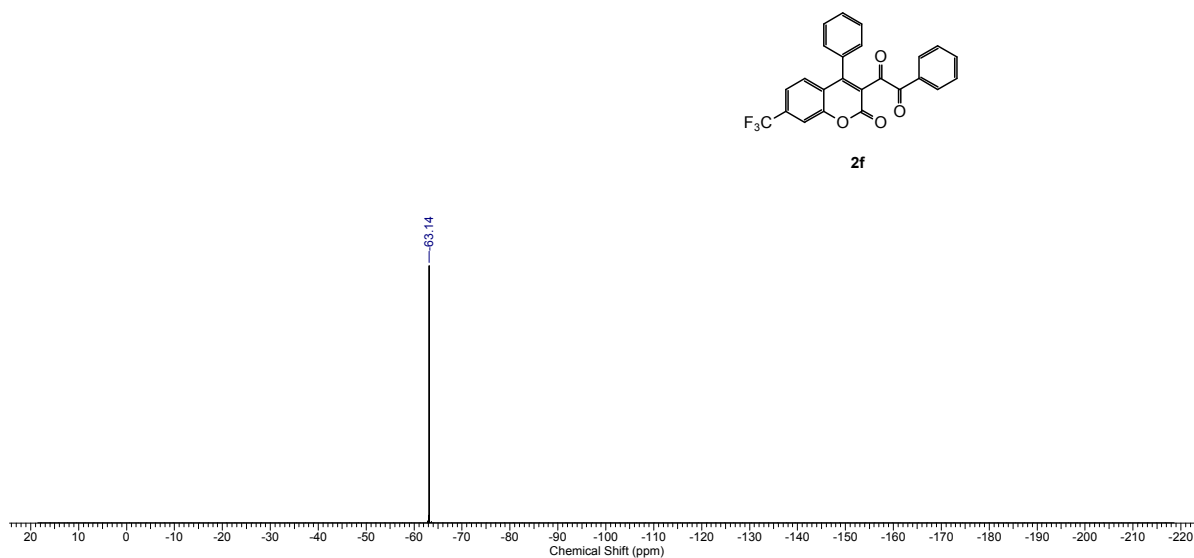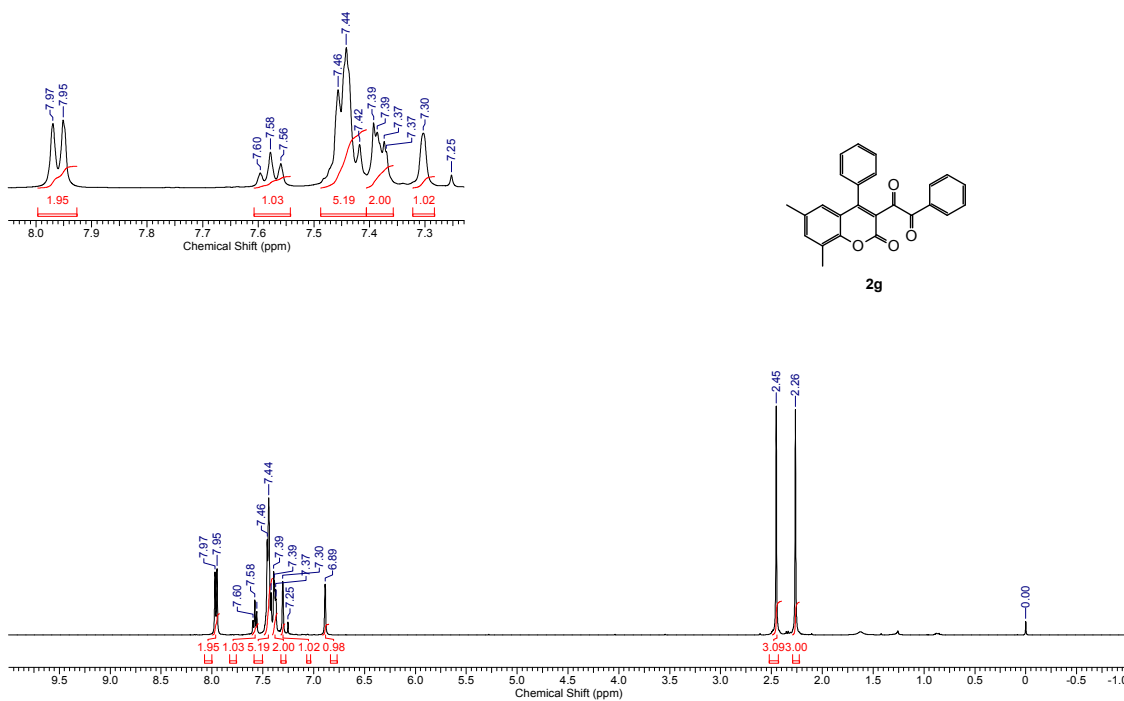

WXJ-257-13C,6341\_000001r

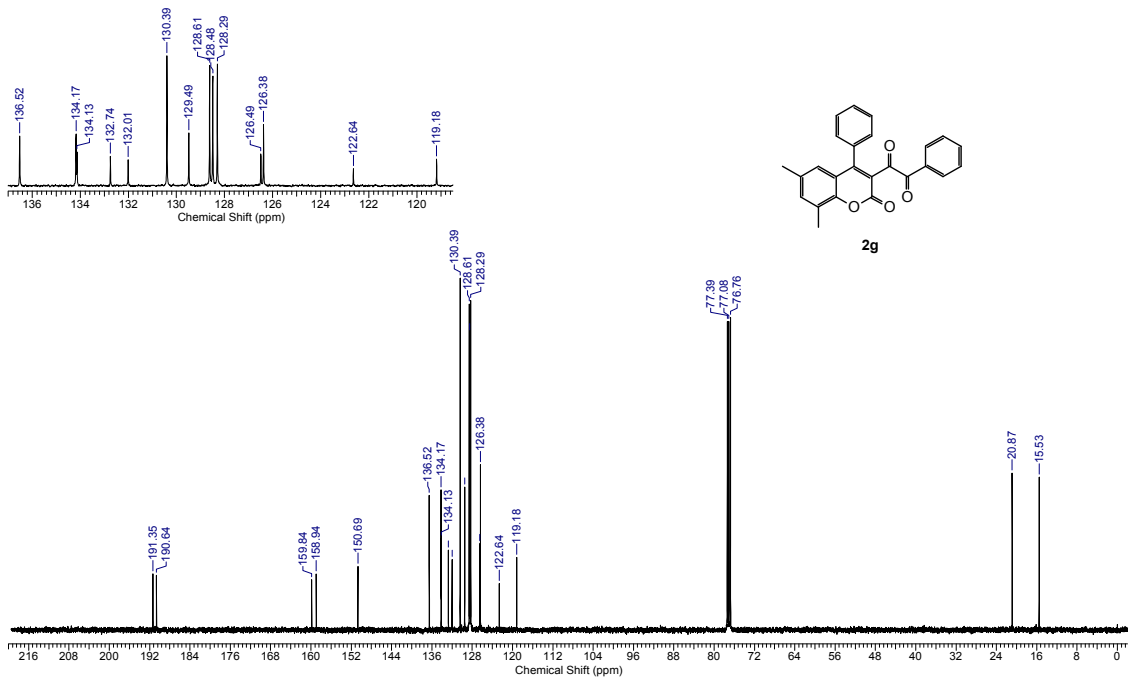

Figure S63. <sup>13</sup>C NMR spectrum of compound 2g

XJH-218,1H,6890\_000001r

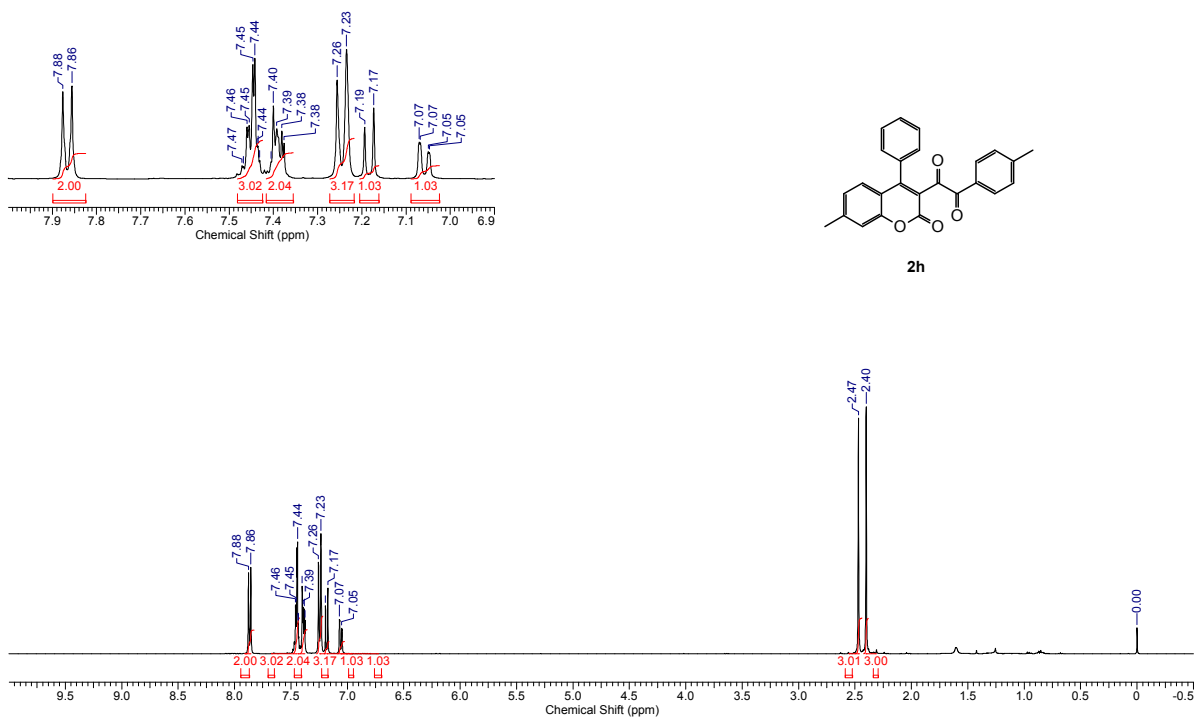

Figure S64. <sup>1</sup>H NMR spectrum of compound 2h

XJH-218,13C,6891\_000001r

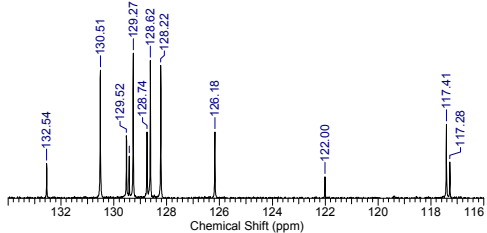

XJH-218,13C,6891\_000001r

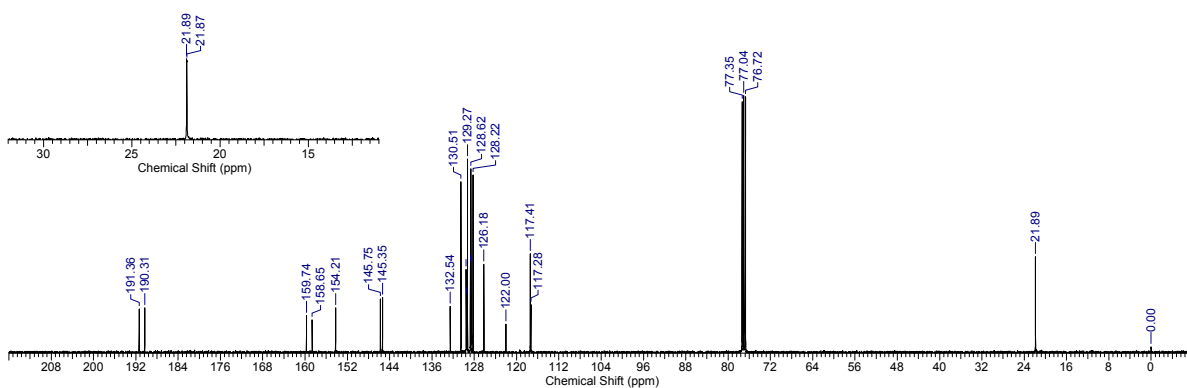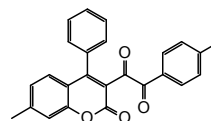

2h

Figure S65. <sup>13</sup>C NMR spectrum of compound 2h

XJH-W-280,1H,8510\_000001r

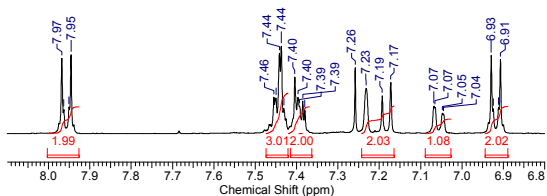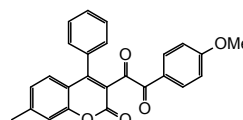

2i

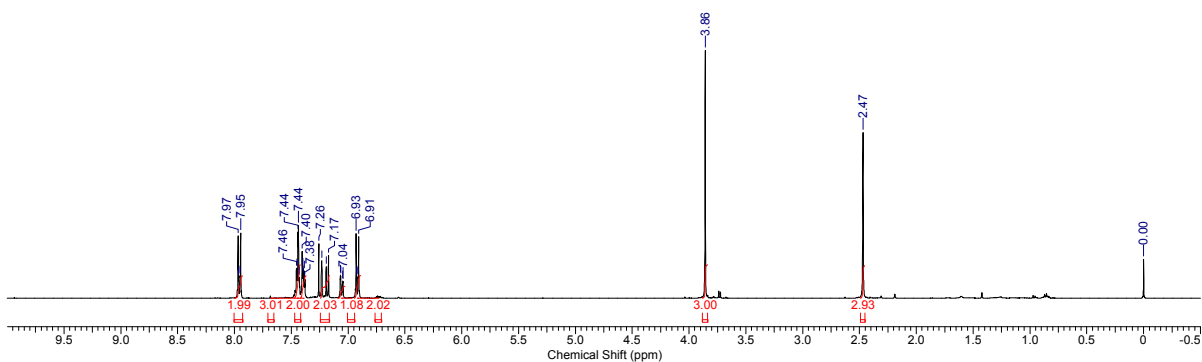

Figure S66. <sup>1</sup>H NMR spectrum of compound 2i

XJH-W-280,13C,8511\_000001r

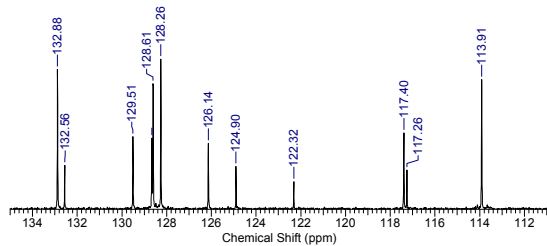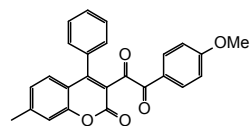

2i

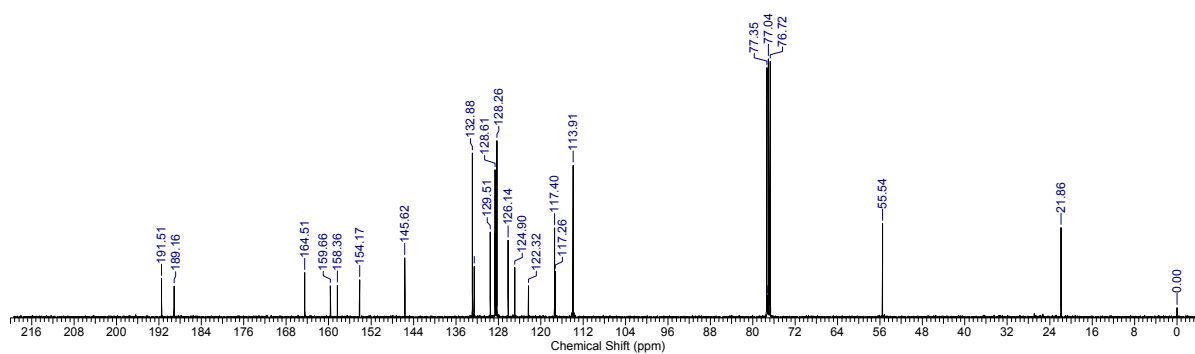

Figure S67. <sup>13</sup>C NMR spectrum of compound 2i

WXJ-283-1H,13140\_000001r

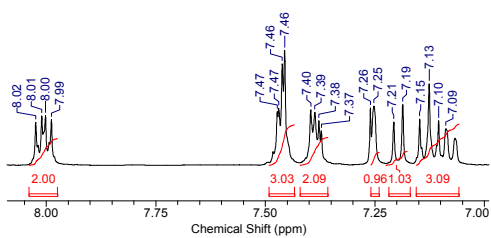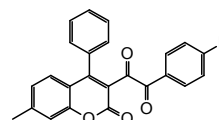

2j

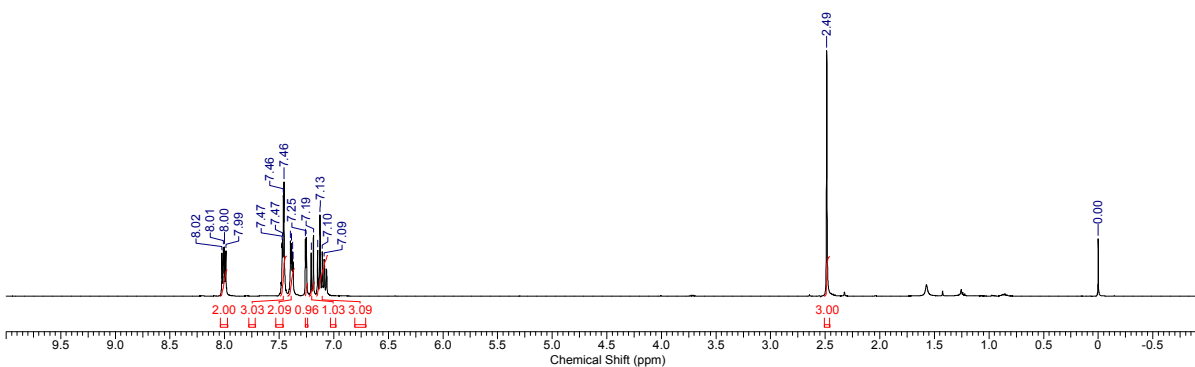

Figure S68. <sup>1</sup>H NMR spectrum of compound 2j

WXJ-283-13C,13142\_000001r

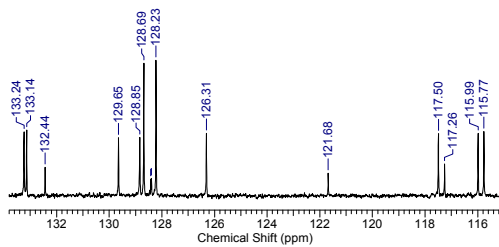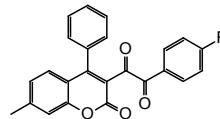

**2j**

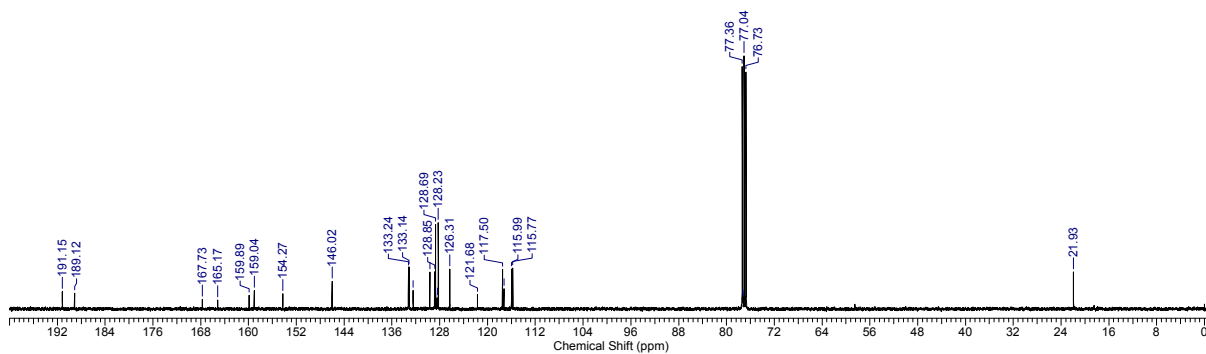

**Figure S69.** <sup>13</sup>C NMR spectrum of compound **2j**

WXJ-283-19F,13141\_000001r

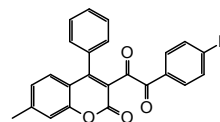

**2j**

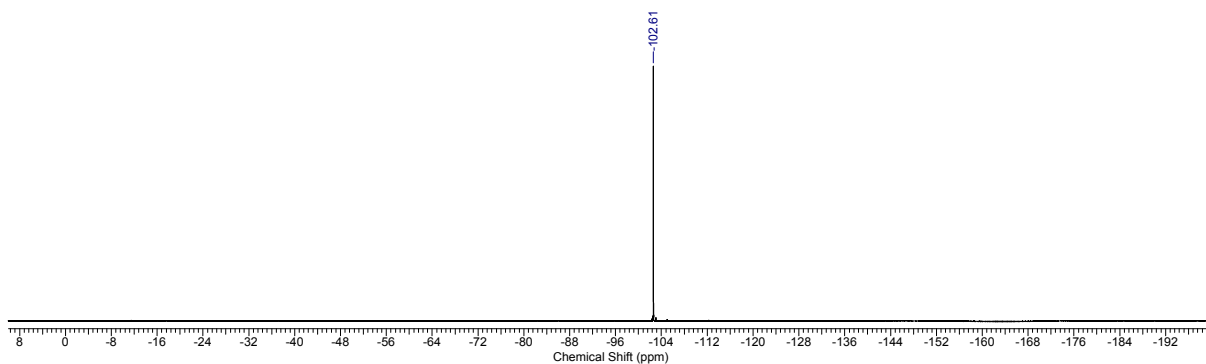

**Figure S70.** <sup>19</sup>F NMR spectrum of compound **2j**

XJH-209-3.1H.5960\_000001r

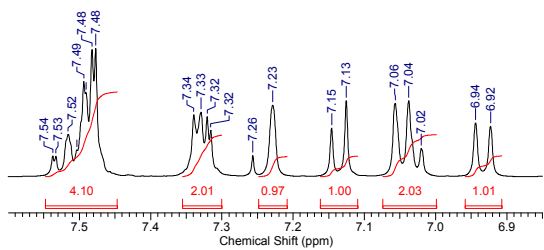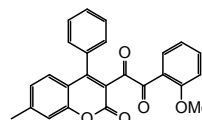

21

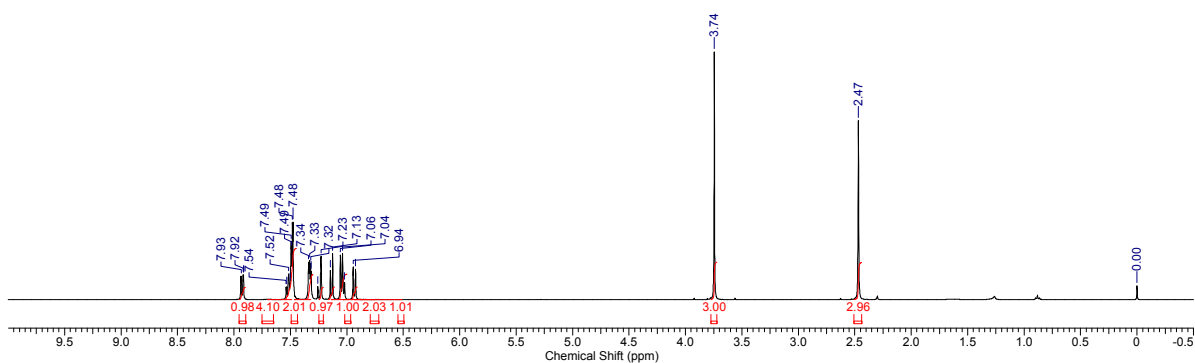

Figure S71. <sup>1</sup>H NMR spectrum of compound 21

XJH-209-3.13C.5961\_000001r

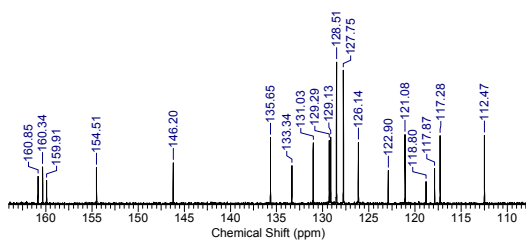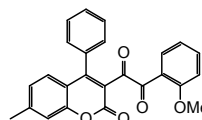

21

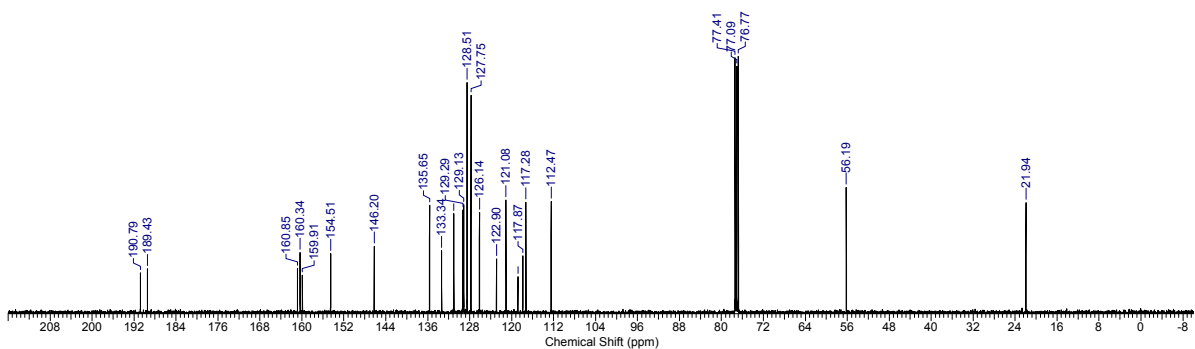

Figure S72. <sup>13</sup>C NMR spectrum of compound 21



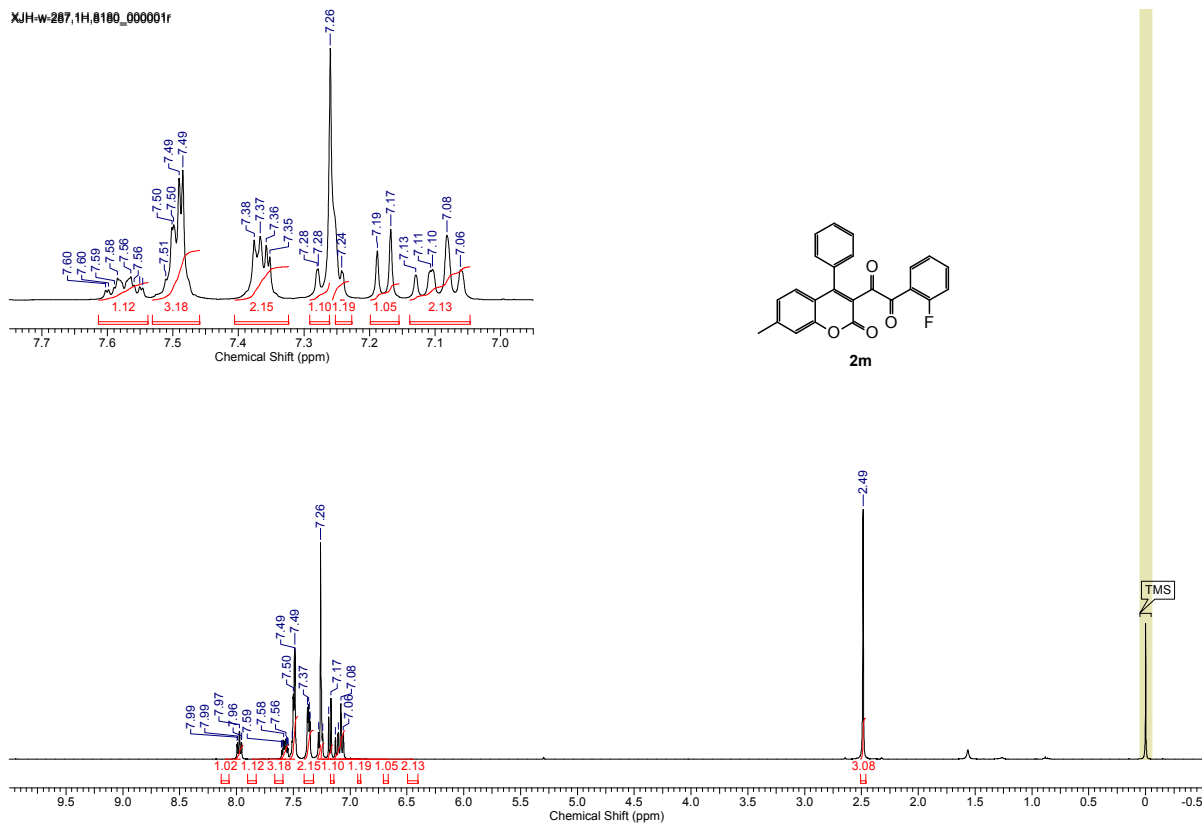

Figure S73.  $^1\text{H}$  NMR spectrum of compound **2m**

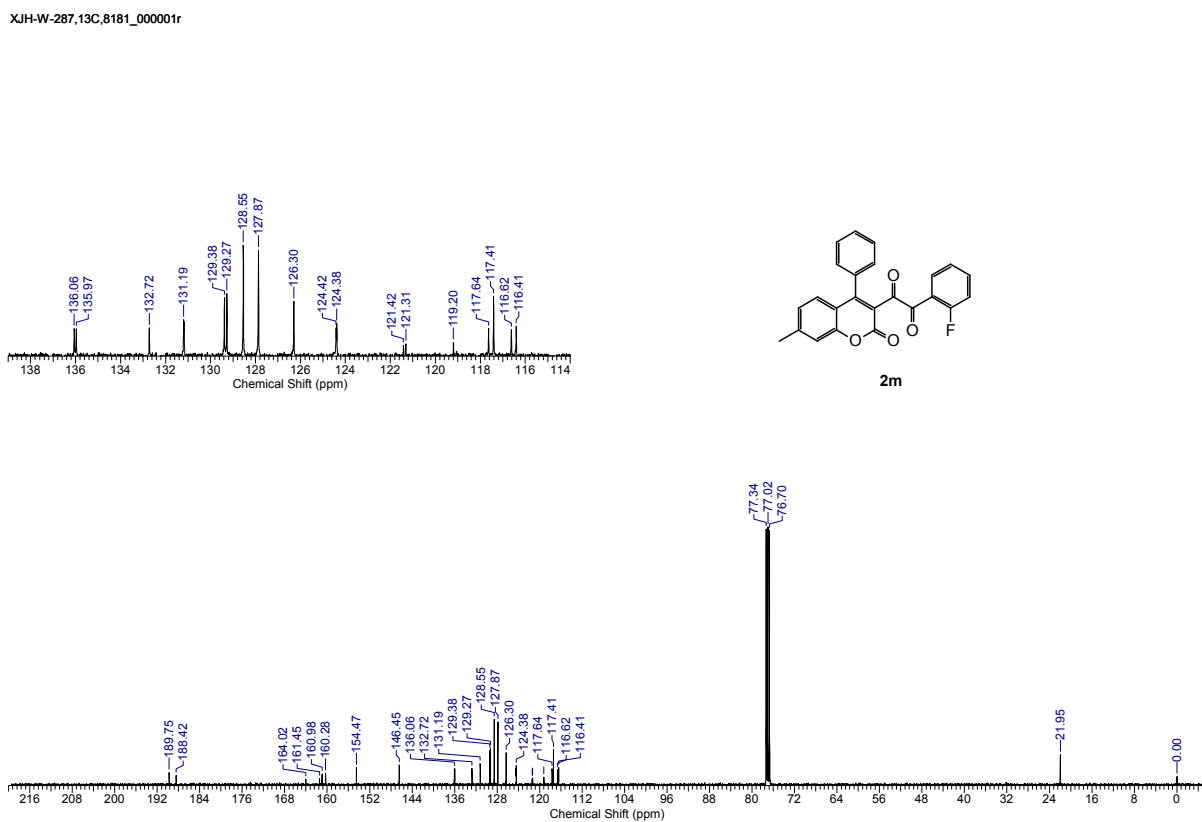

Figure S74.  $^{13}\text{C}$  NMR spectrum of compound **2m**

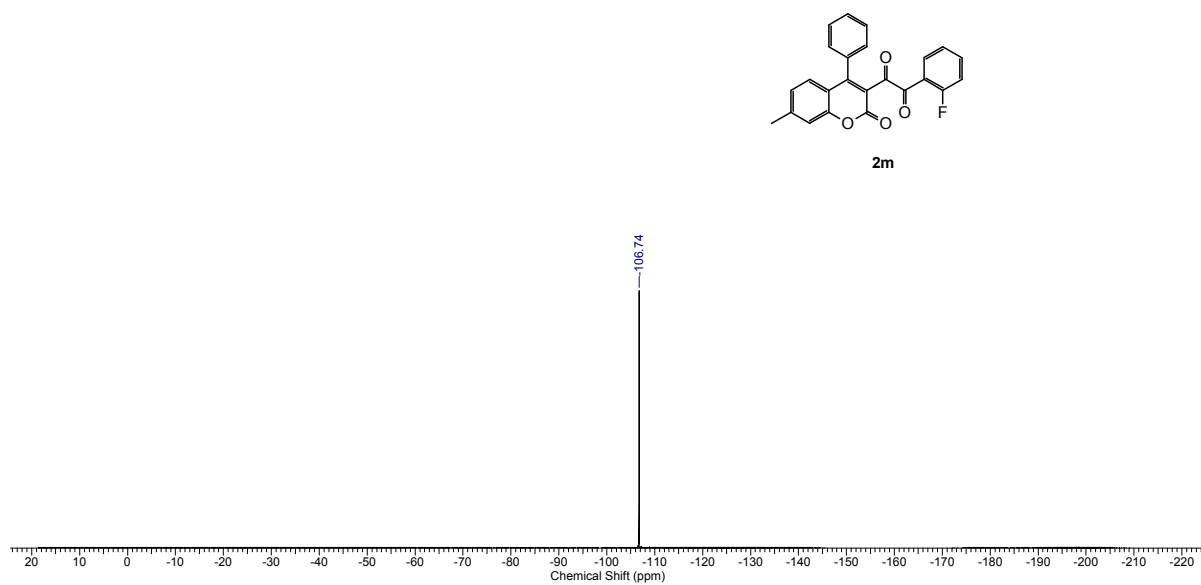Figure S75. <sup>19</sup>F NMR spectrum of compound **2m**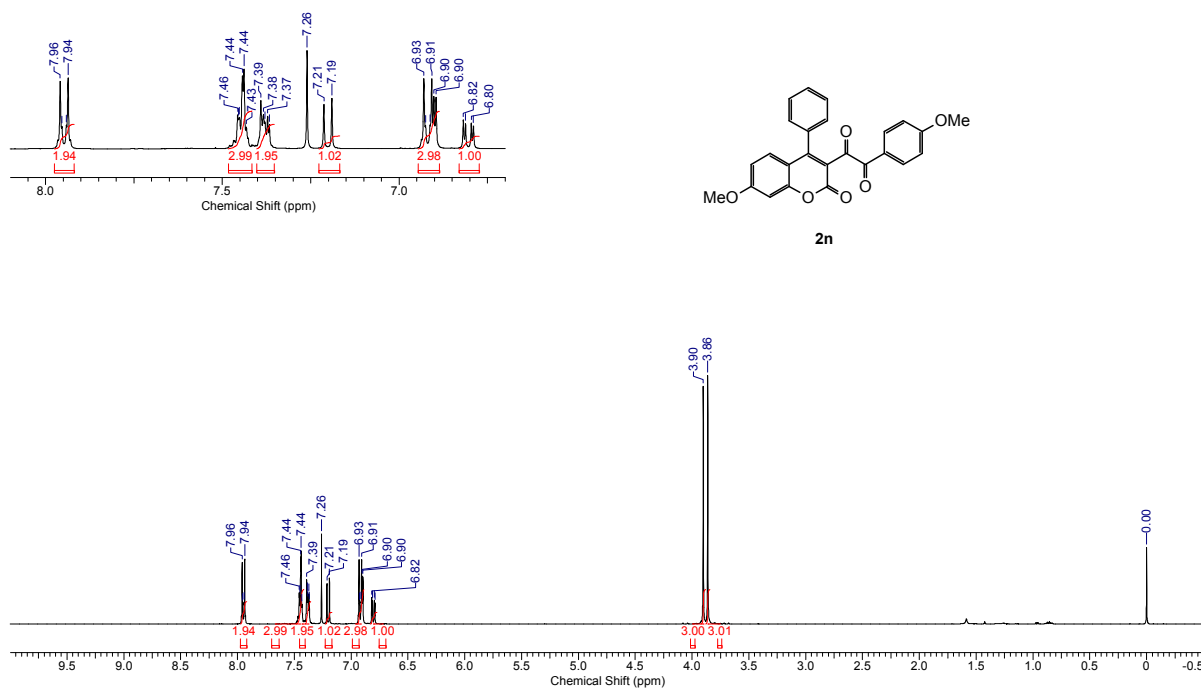Figure S76. <sup>1</sup>H NMR spectrum of compound **2n**

XJH-W-300,13C,8501\_000001r

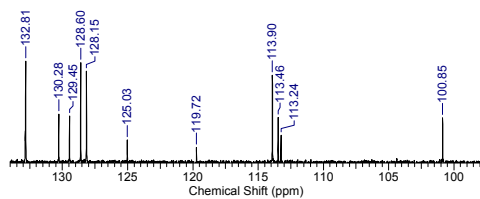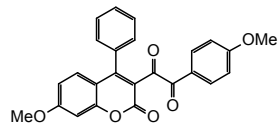

2n

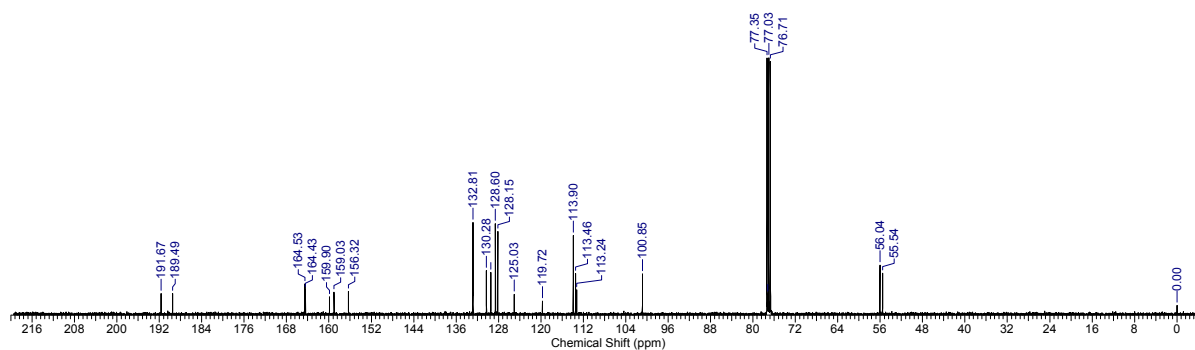

Figure S77. <sup>13</sup>C NMR spectrum of compound 2n

XJH-155-2,1H,44\_000001r

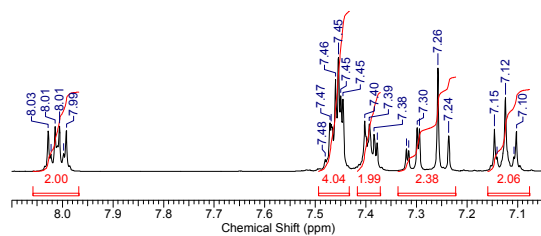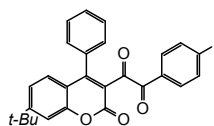

2o

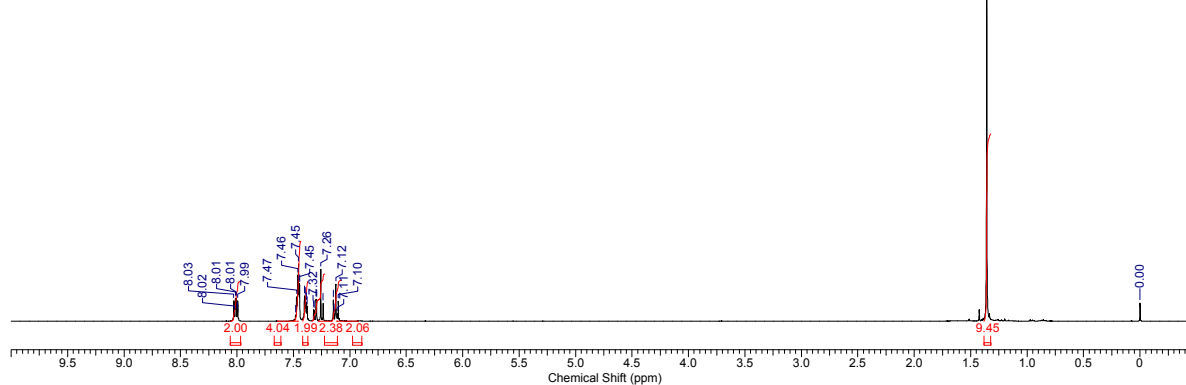

Figure S78. <sup>1</sup>H NMR spectrum of compound 2o

XJH-155-2,13C,52\_000001r

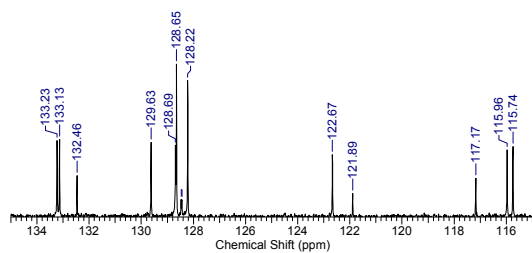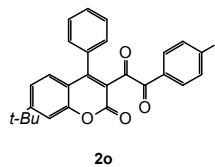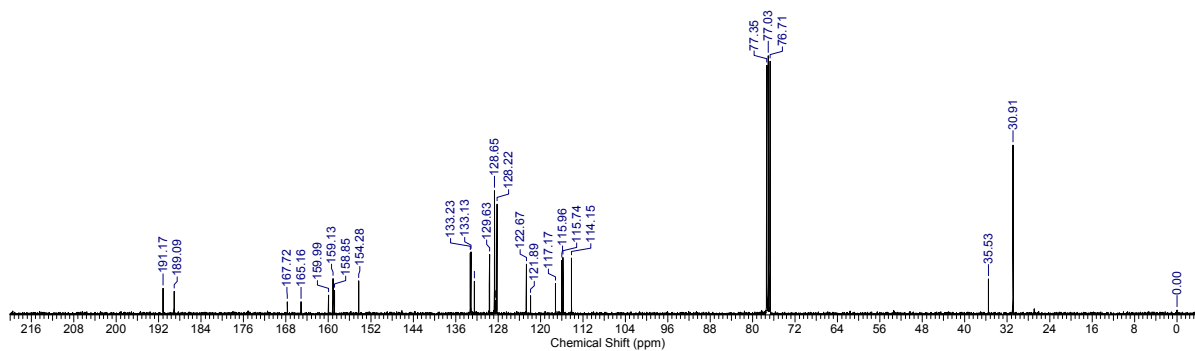

Figure S79. <sup>13</sup>C NMR spectrum of compound **2o**

2O-XJH-155-2,19F,51\_000001r

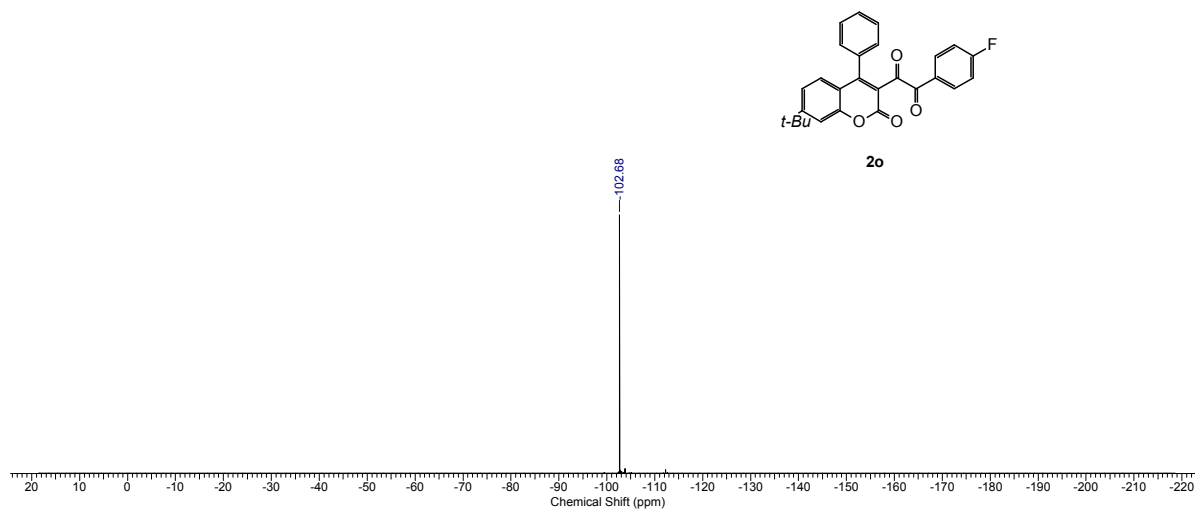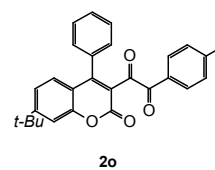

Figure S80. <sup>19</sup>F NMR spectrum of compound **2o**

XJH-175-3.1H.819\_000001r

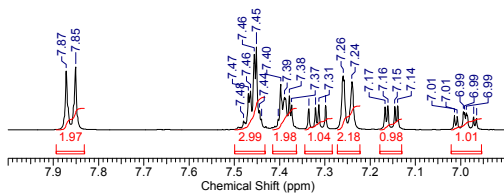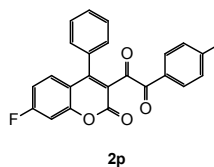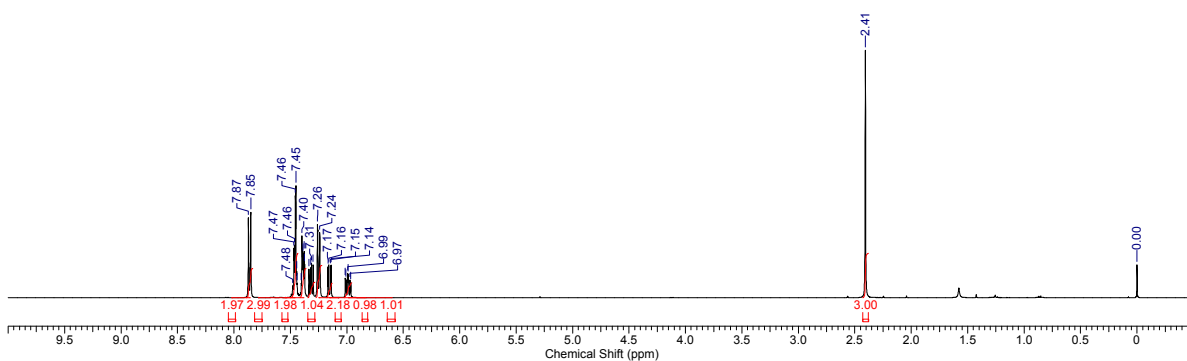

Figure S81. <sup>1</sup>H NMR spectrum of compound 2p

XJH-175-3.13C.825\_000001r

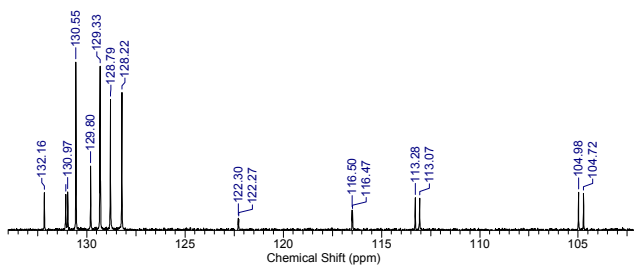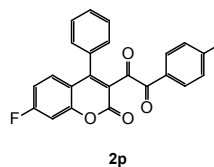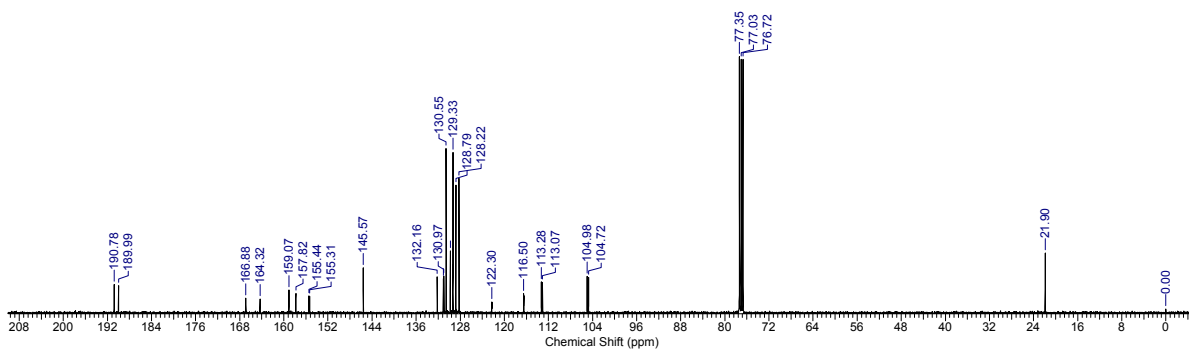

Figure S82. <sup>13</sup>C NMR spectrum of compound 2p

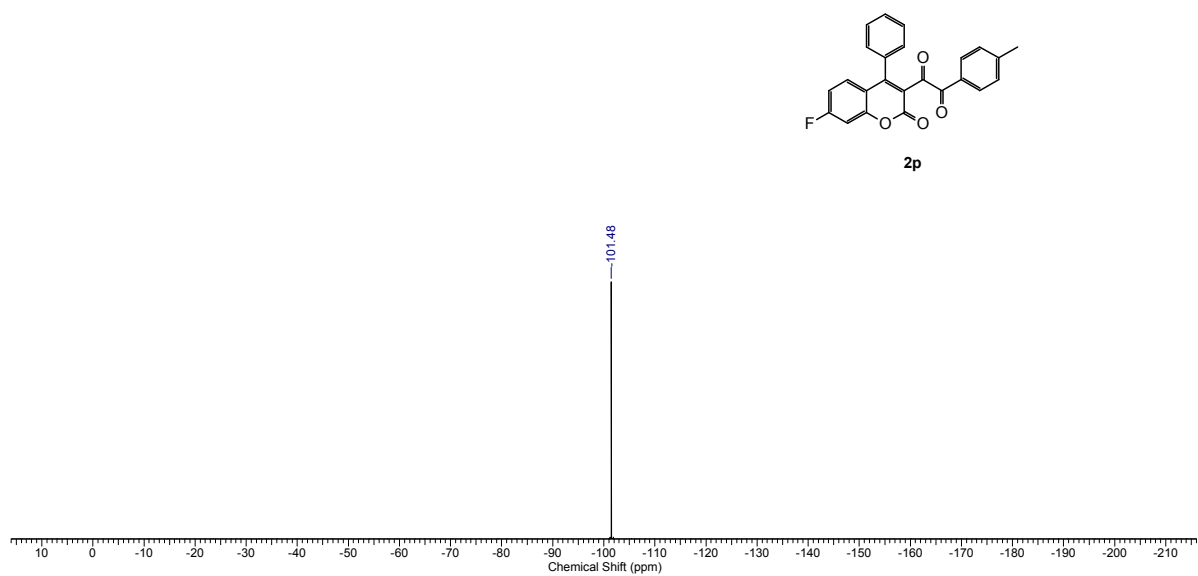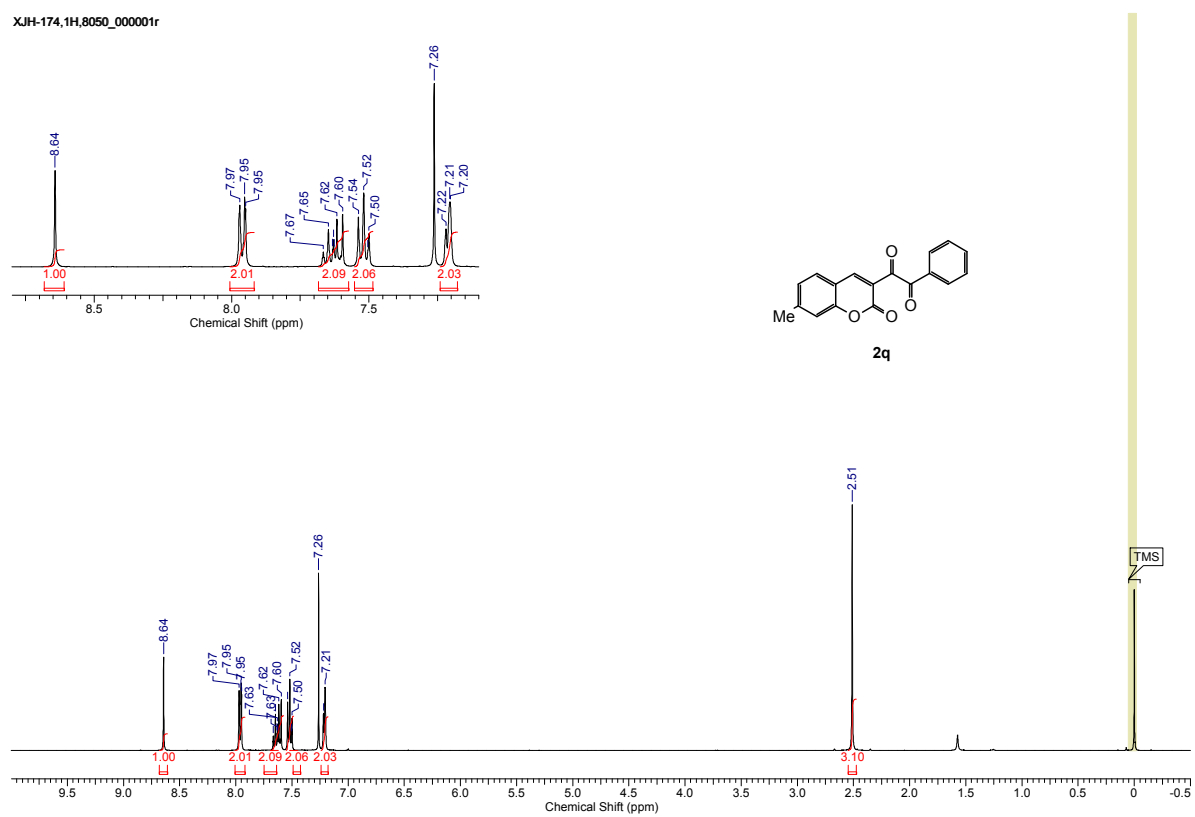

XJH-174-3,13C,783\_000001r

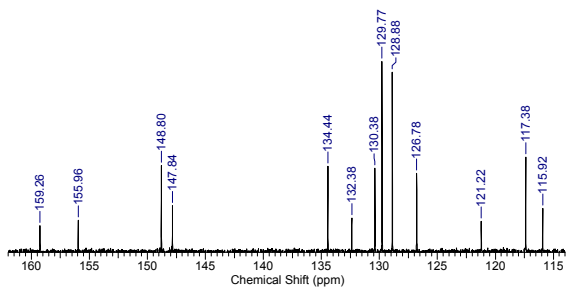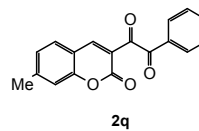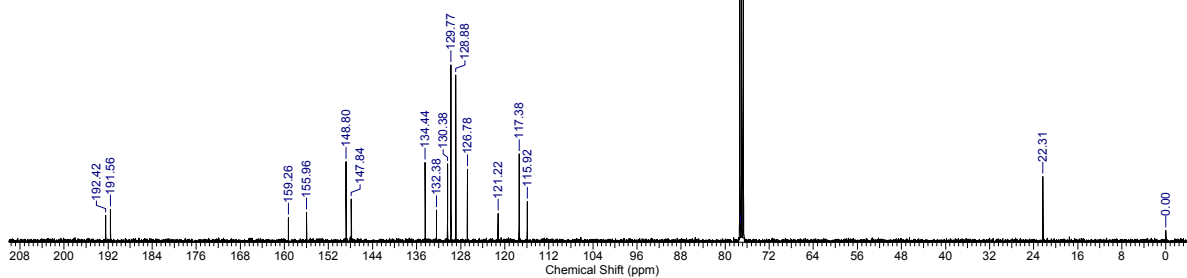

Figure S85. <sup>13</sup>C NMR spectrum of compound 2q

XJH-204-2,1H,5760\_000001r

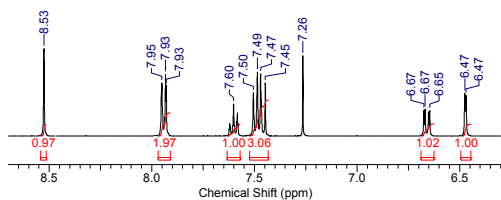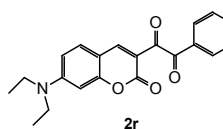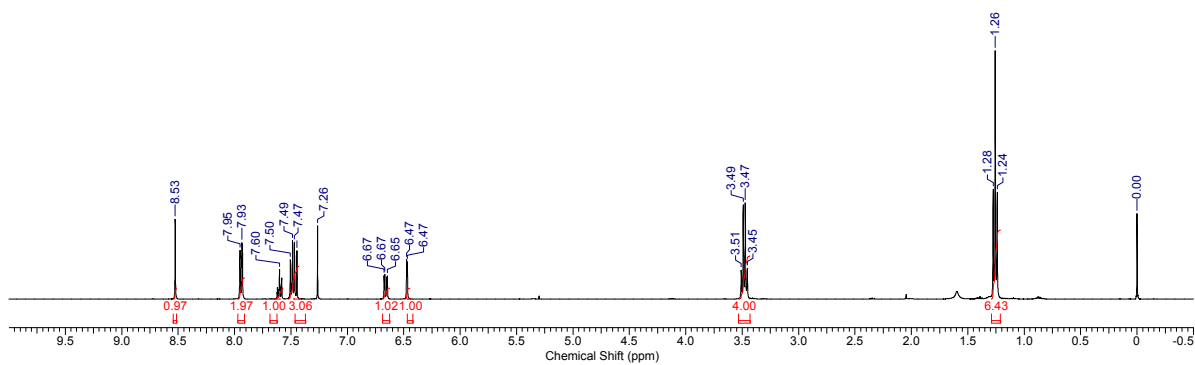

Figure S86. <sup>1</sup>H NMR spectrum of compound 2r

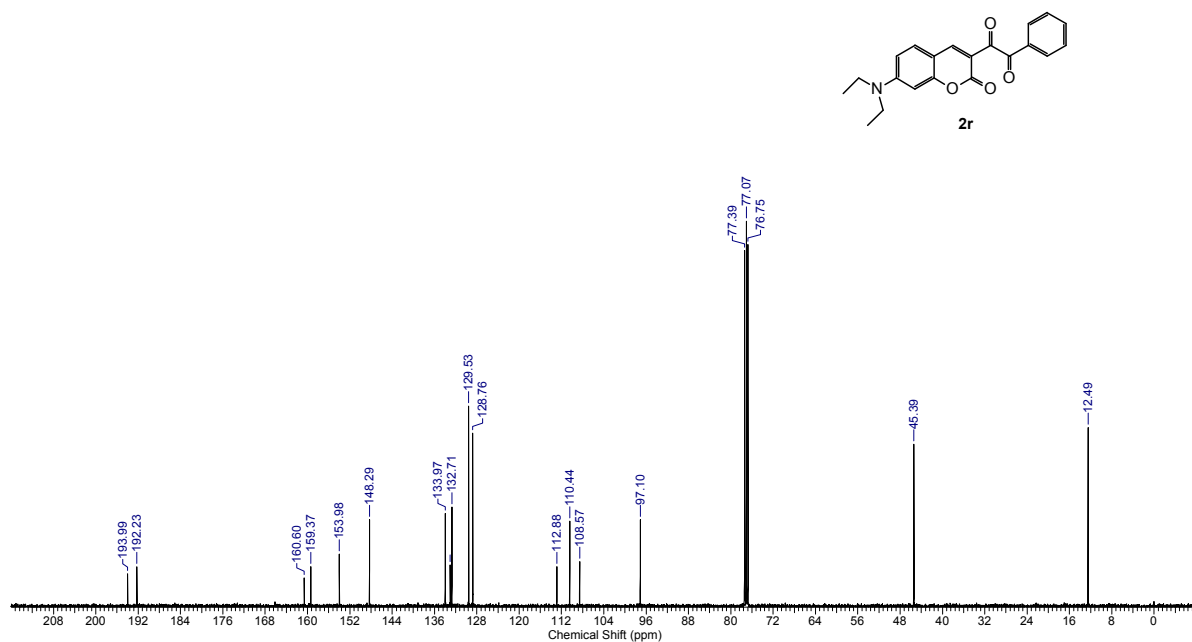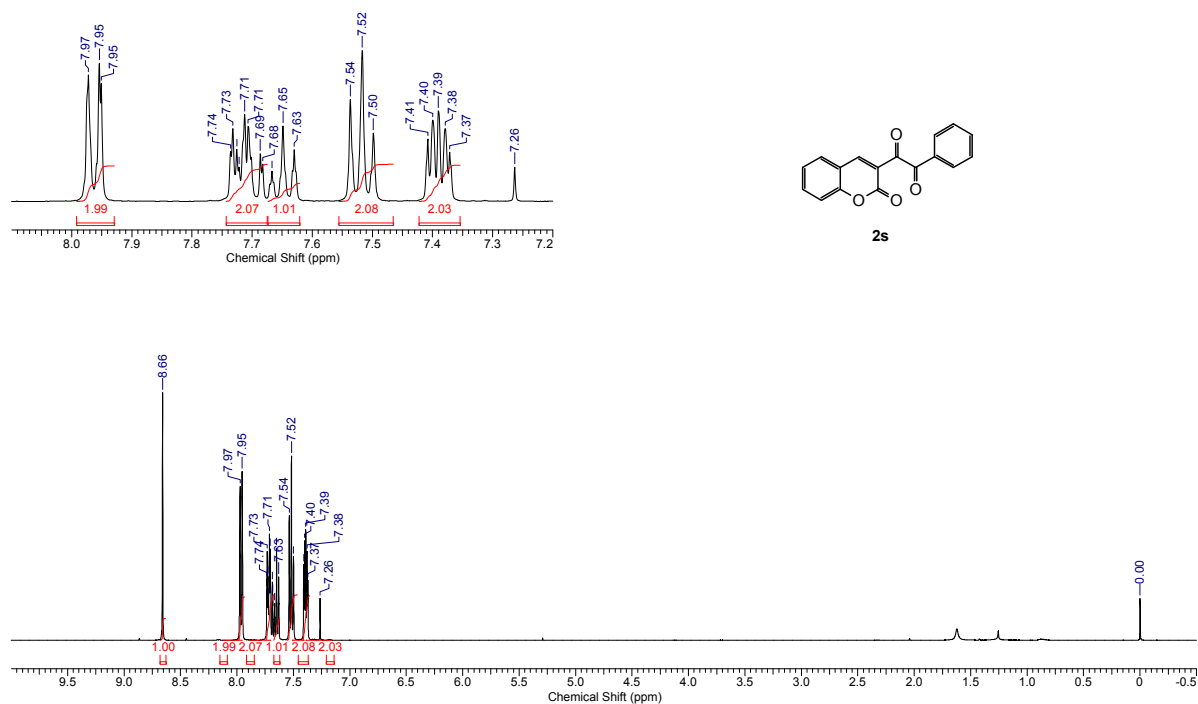



XJH-165-1,13C\_535\_000001r

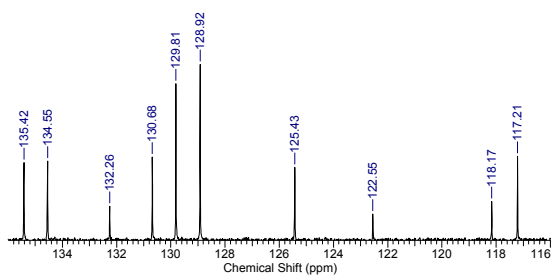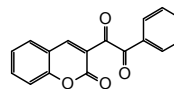

2s

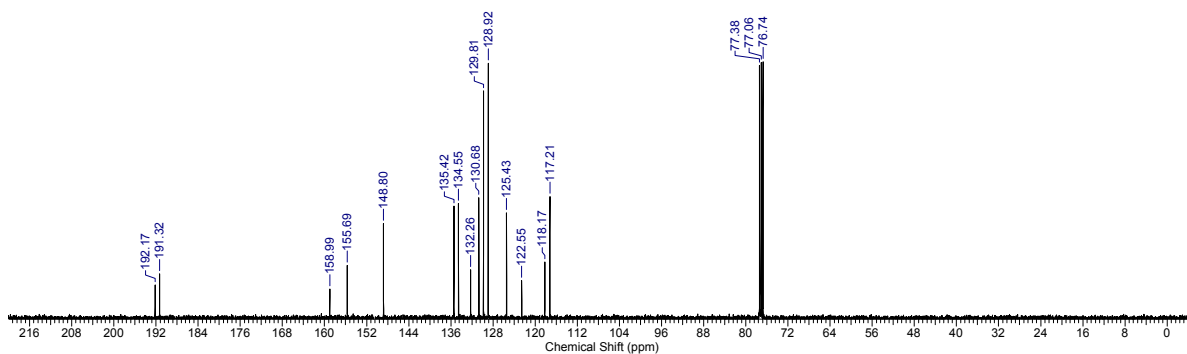

Figure S89. <sup>13</sup>C NMR spectrum of compound 2s

XJH-213,1H,8060\_000001r

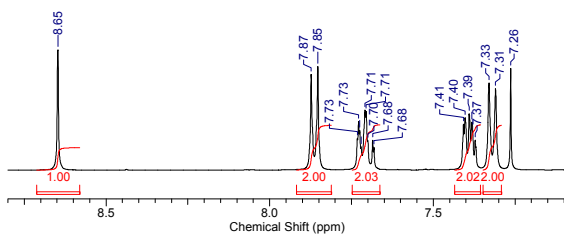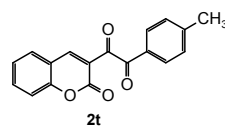

2t

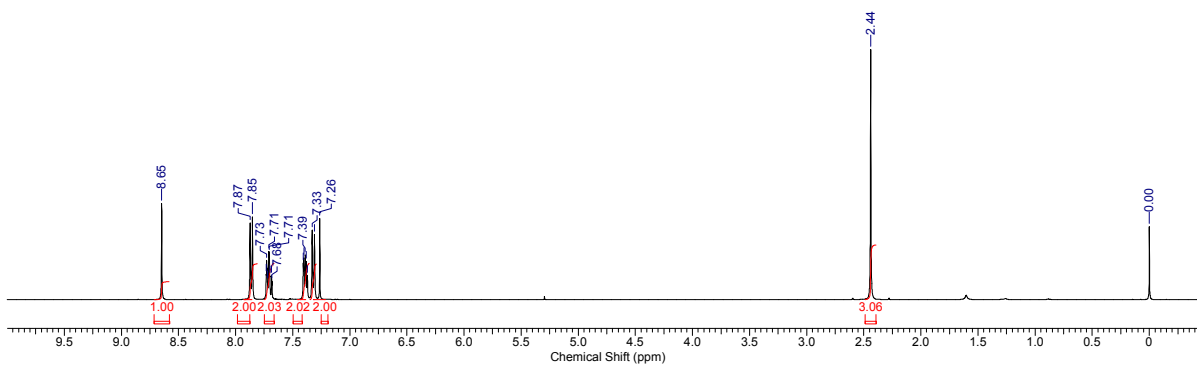

Figure S90. <sup>1</sup>H NMR spectrum of compound 2t

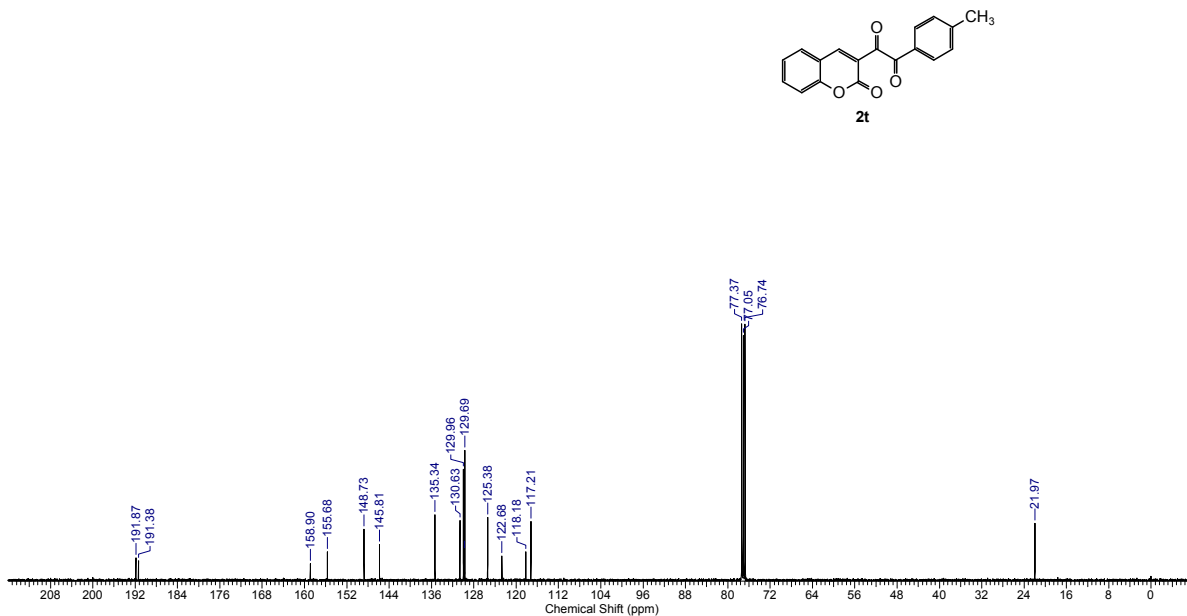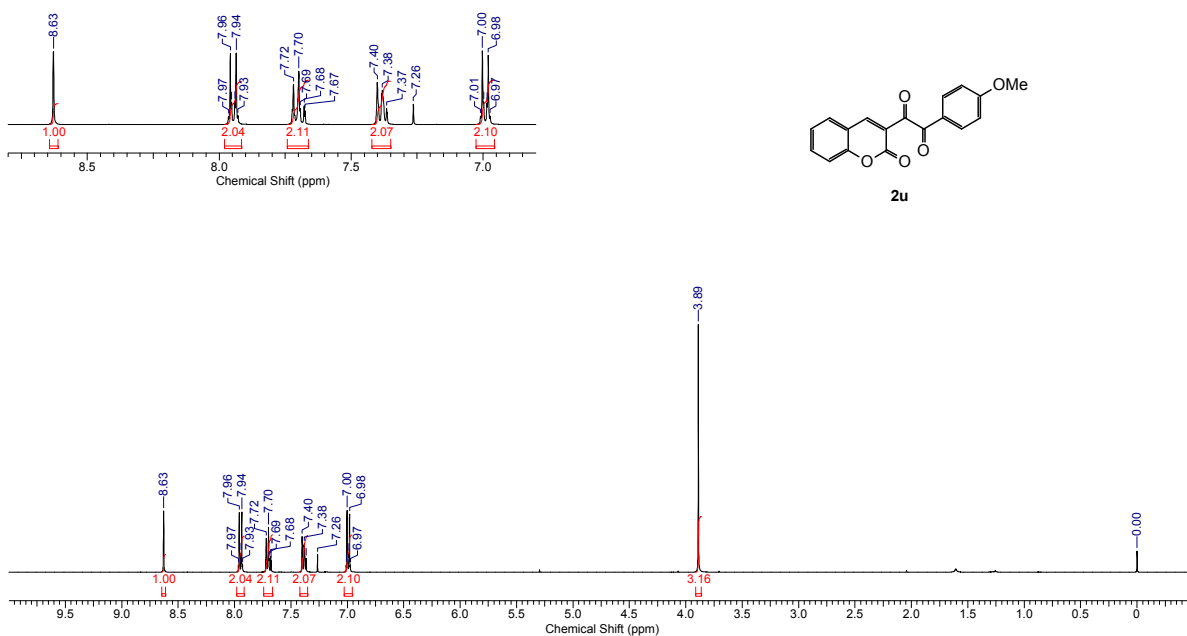

XJH-176-2,13C,826\_000001r

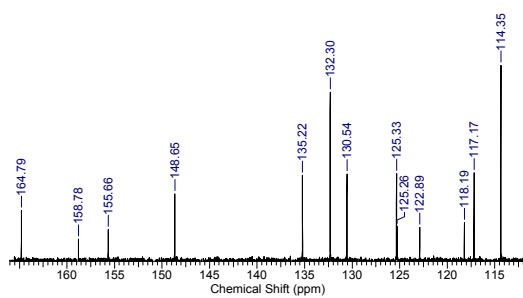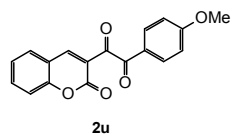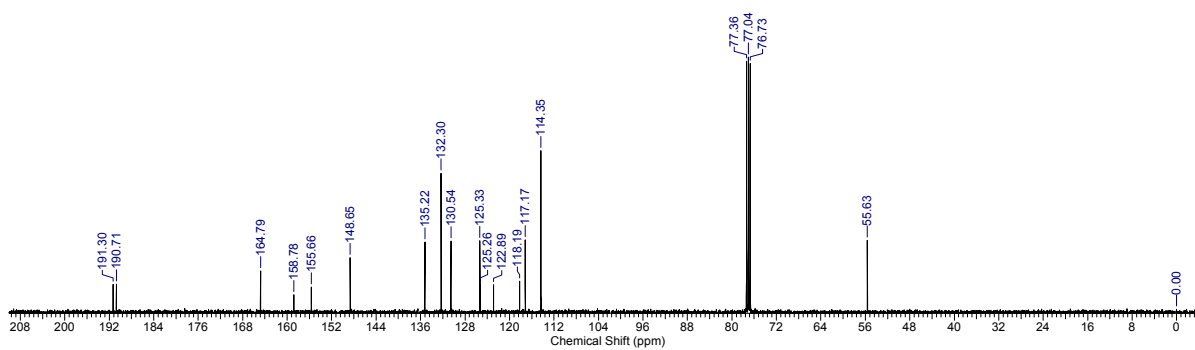

Figure S93. <sup>13</sup>C NMR spectrum of compound **2u**

XJH-164,1H,8070\_000001r

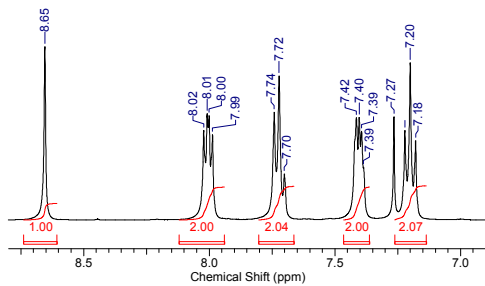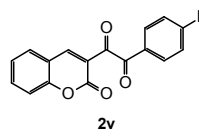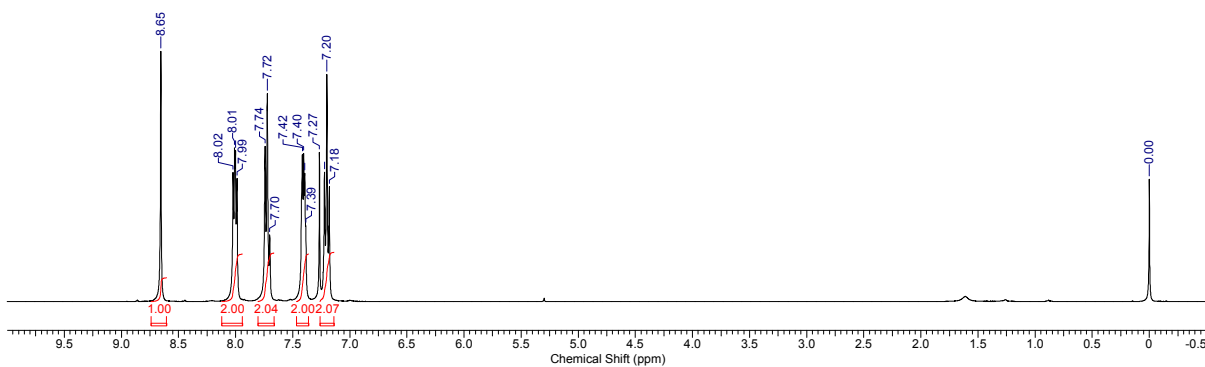

Figure S94. <sup>1</sup>H NMR spectrum of compound **2v**

XJH-164-1,13C,534\_000001r

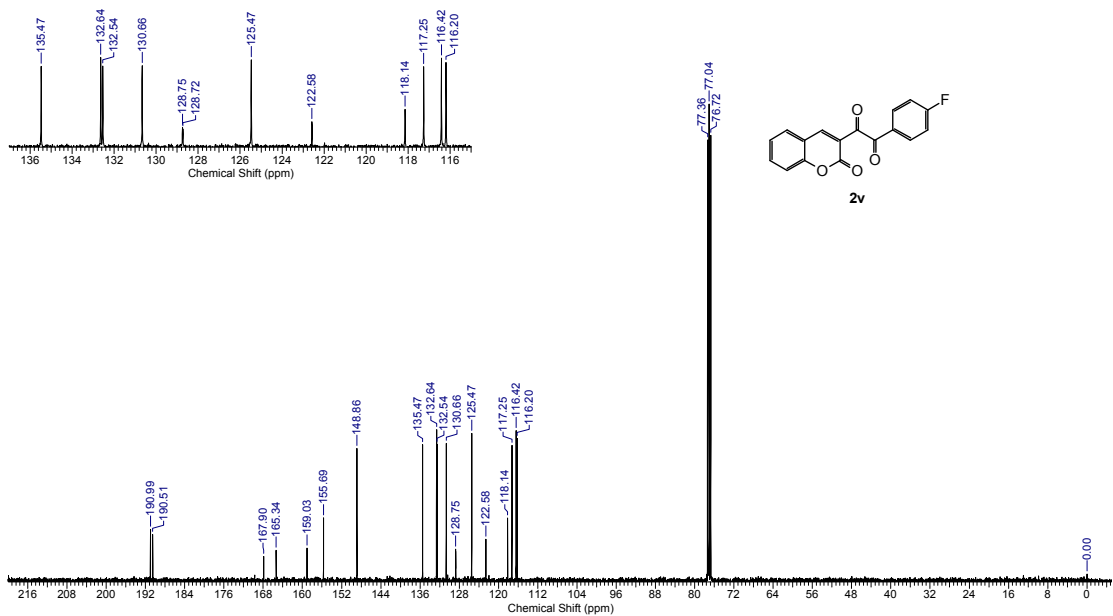

**Figure S95.**  $^{13}\text{C}$  NMR spectrum of compound **2v**

XJH-164-1,19F,520\_000001r

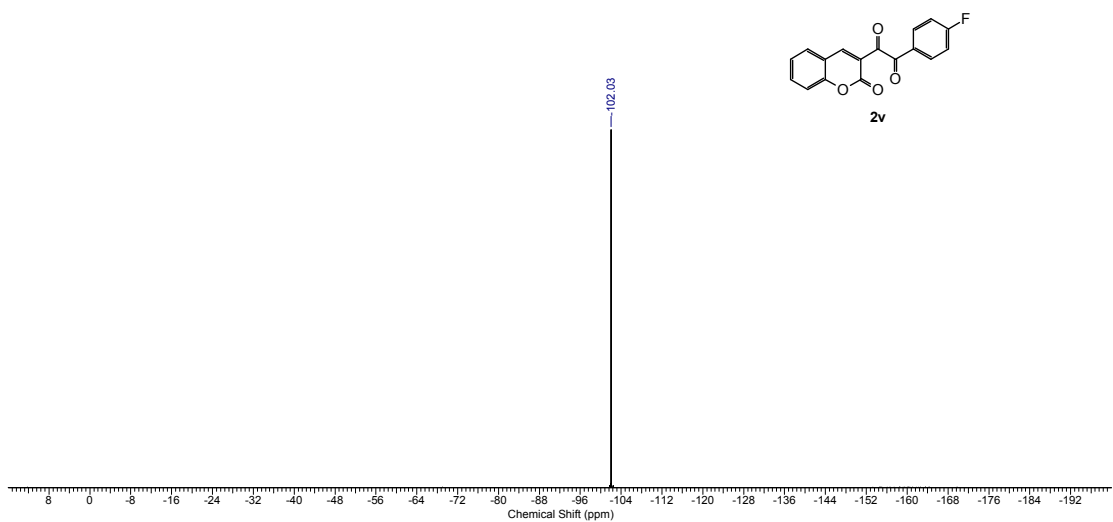

**Figure S96.**  $^{19}\text{F}$  NMR spectrum of compound **2v**

XJH-216,1H,7000\_000001r

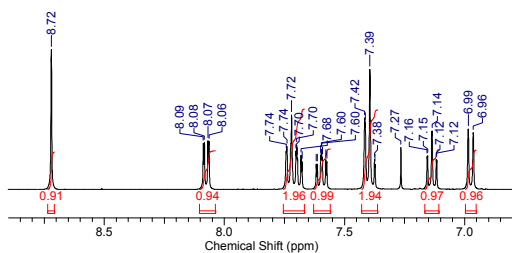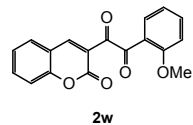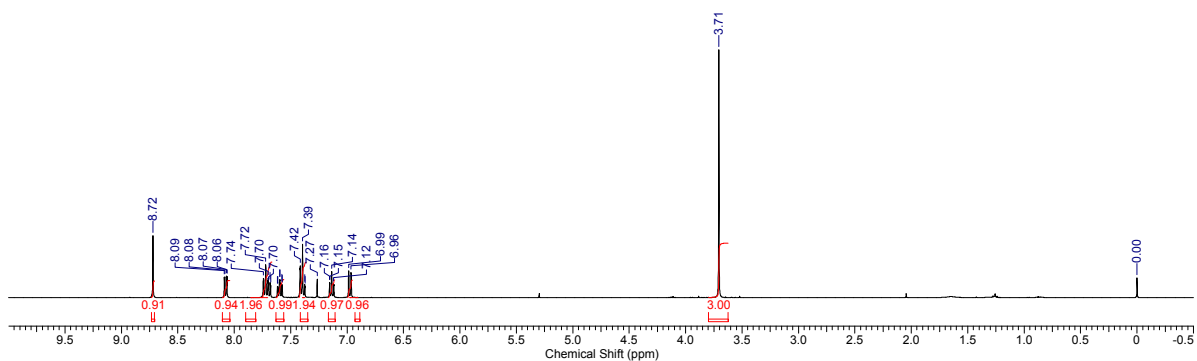

Figure S97. <sup>1</sup>H NMR spectrum of compound **2w**

XJH-216,13C,7081\_0000001r

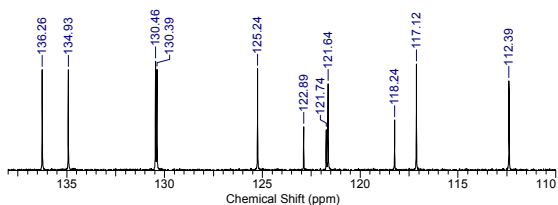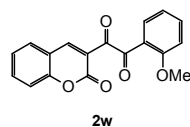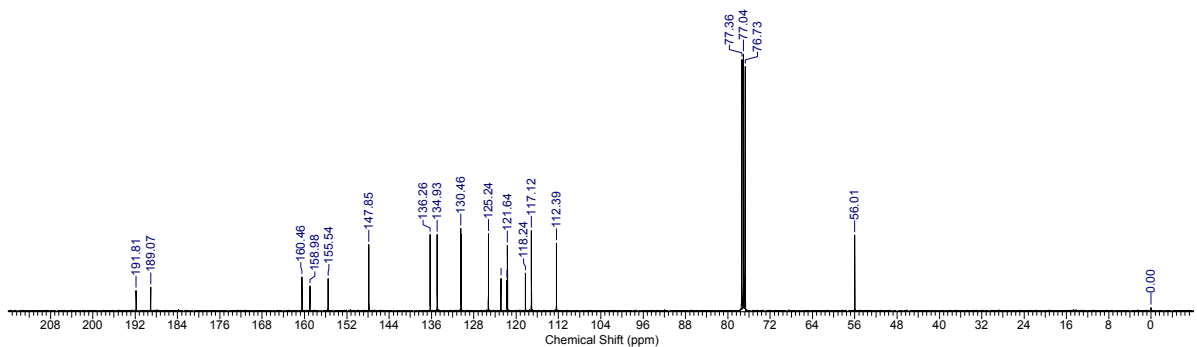

Figure S98. <sup>13</sup>C NMR spectrum of compound **2w**

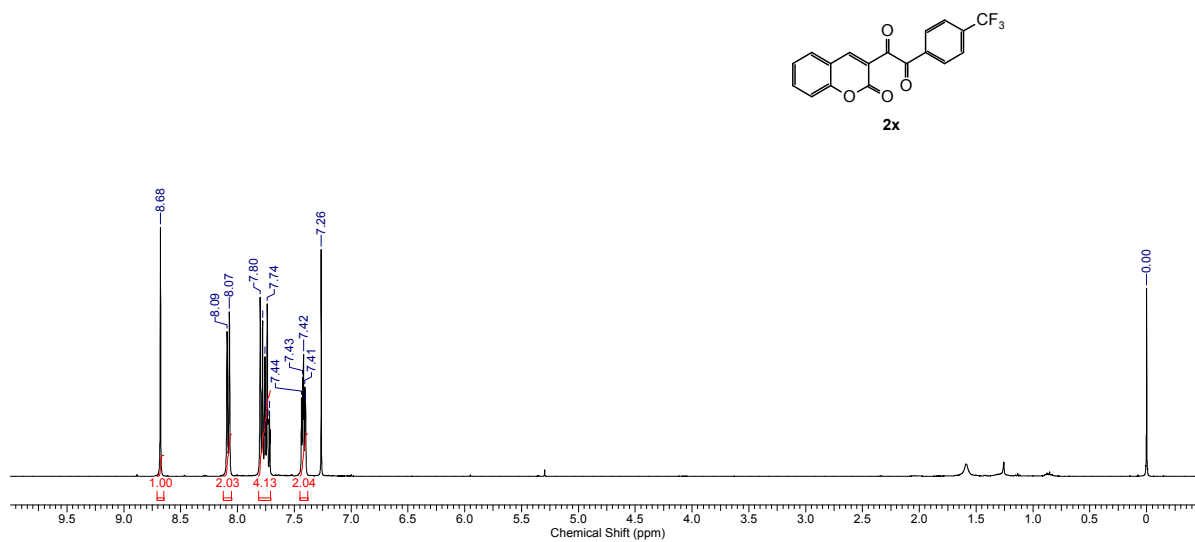Figure S99. <sup>1</sup>H NMR spectrum of compound **2x**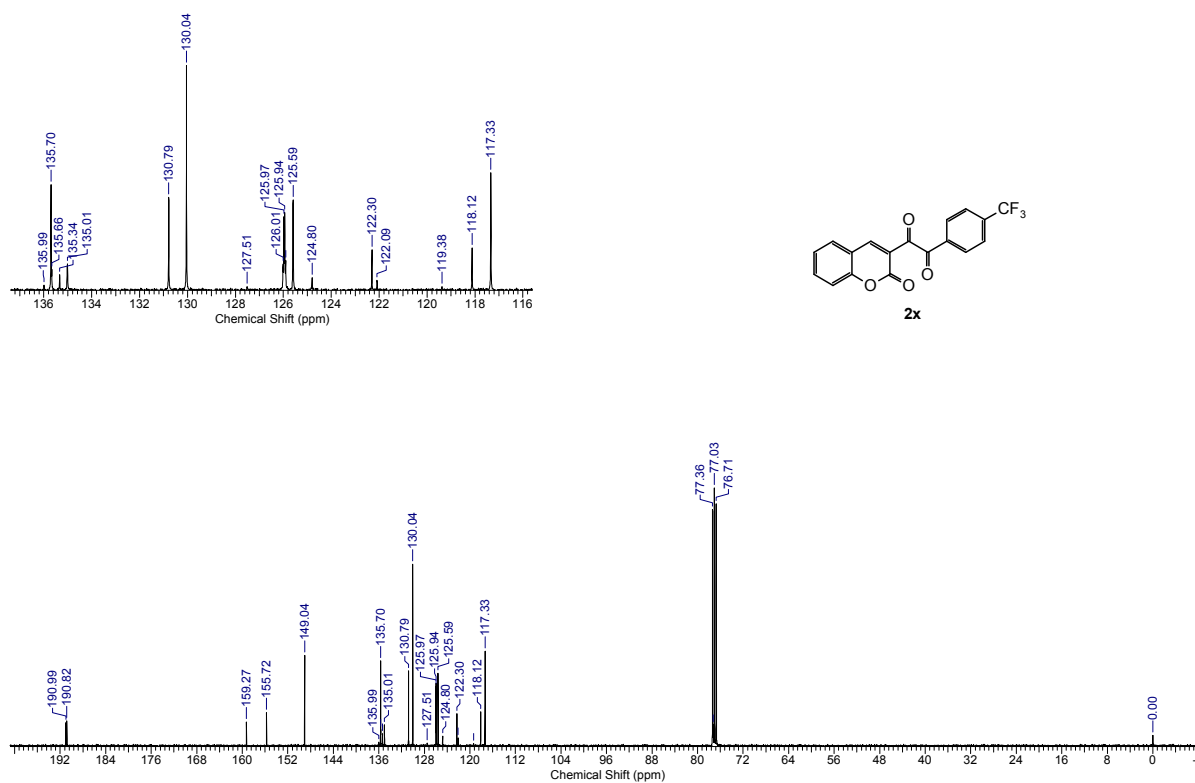Figure S100. <sup>13</sup>C NMR spectrum of compound **2x**

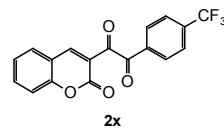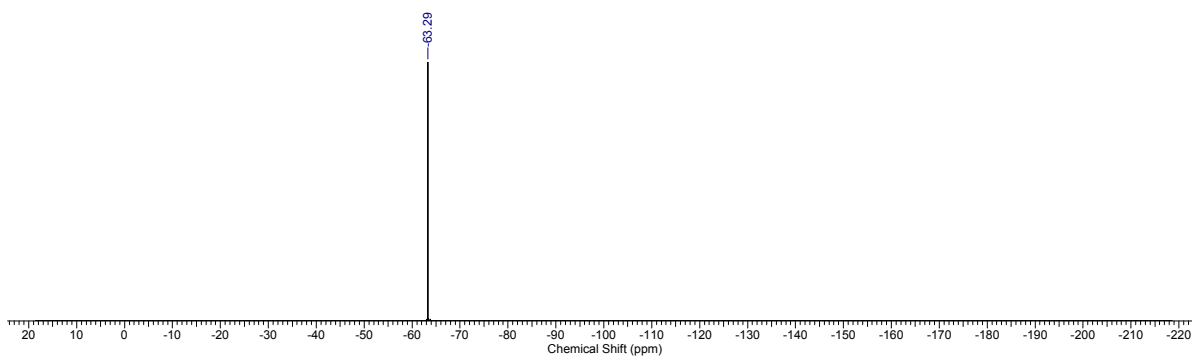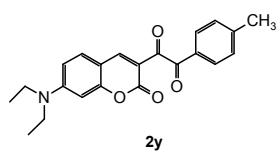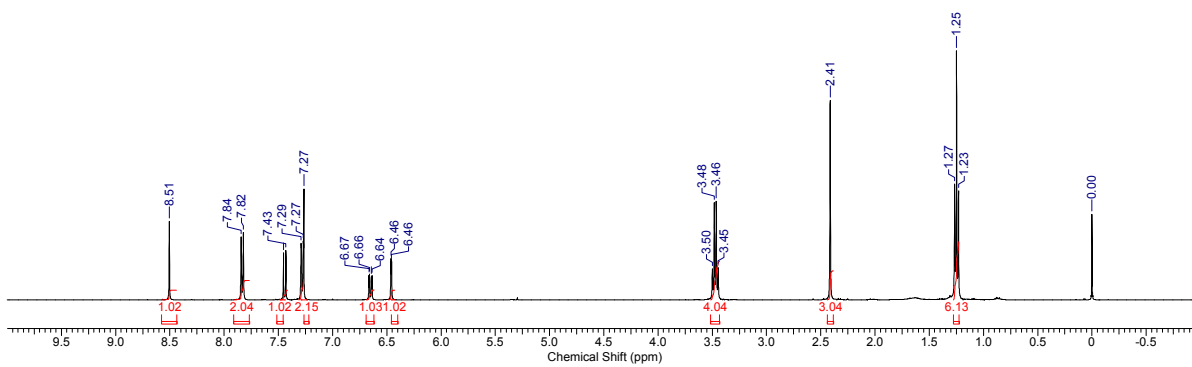

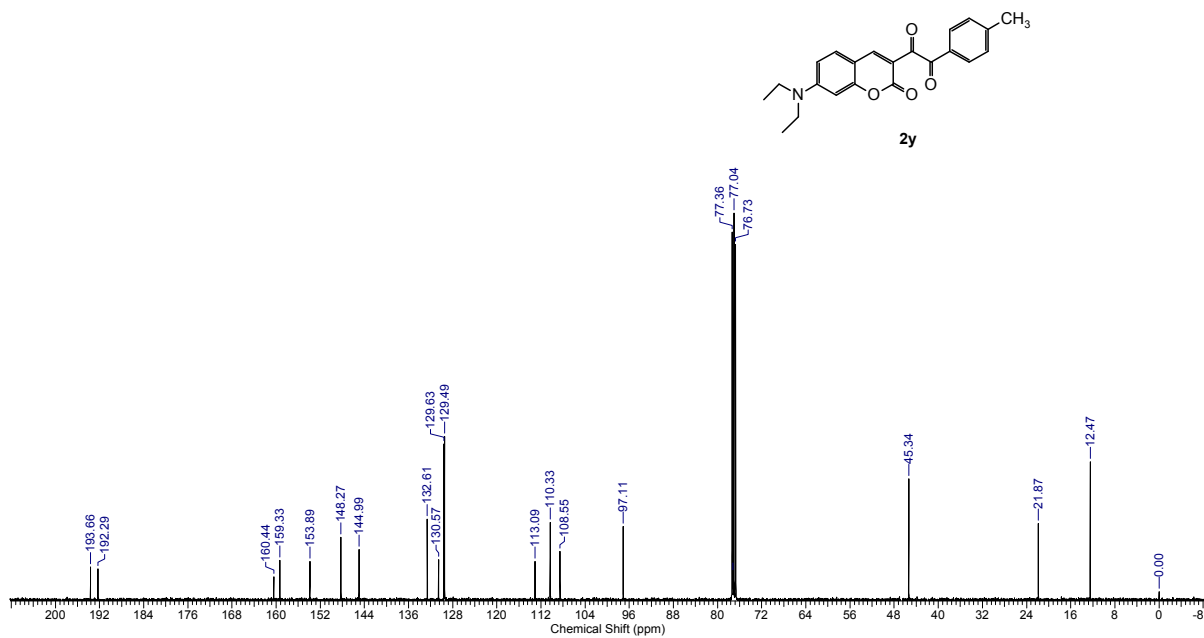Figure S103. <sup>13</sup>C NMR spectrum of compound **2y**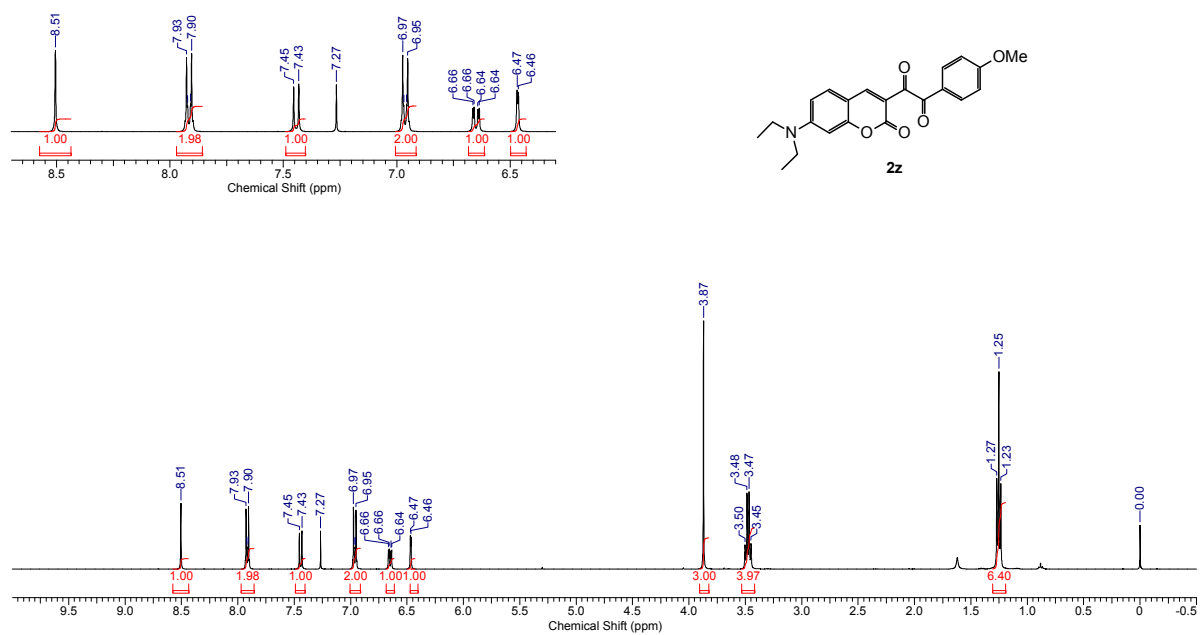Figure S104. <sup>1</sup>H NMR spectrum of compound **2z**



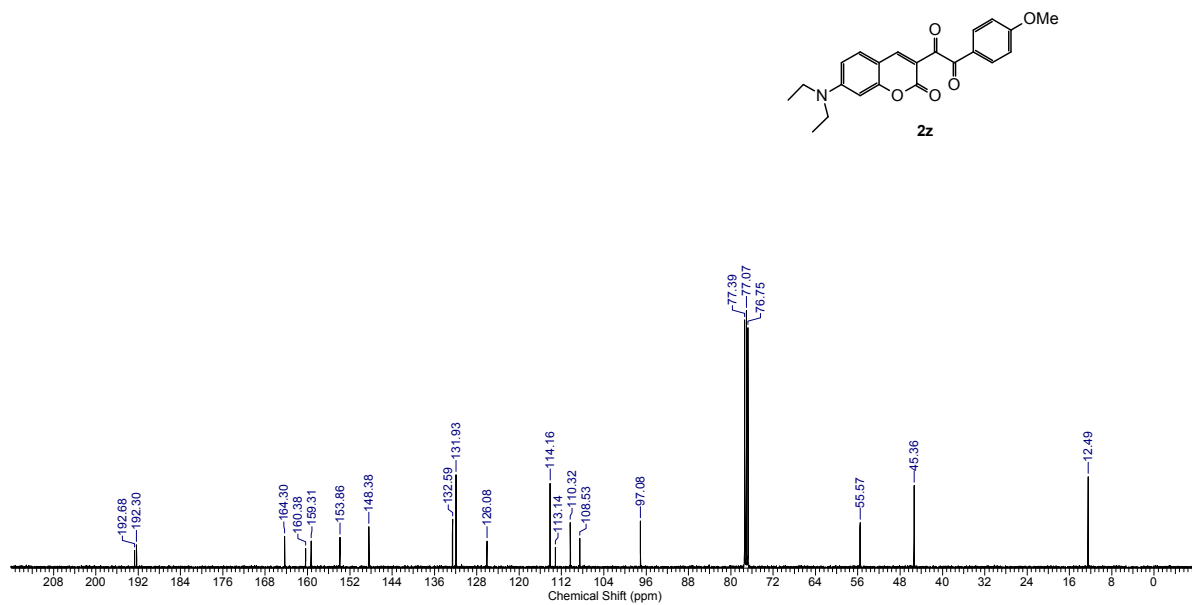Figure S105. <sup>13</sup>C NMR spectrum of compound **2z**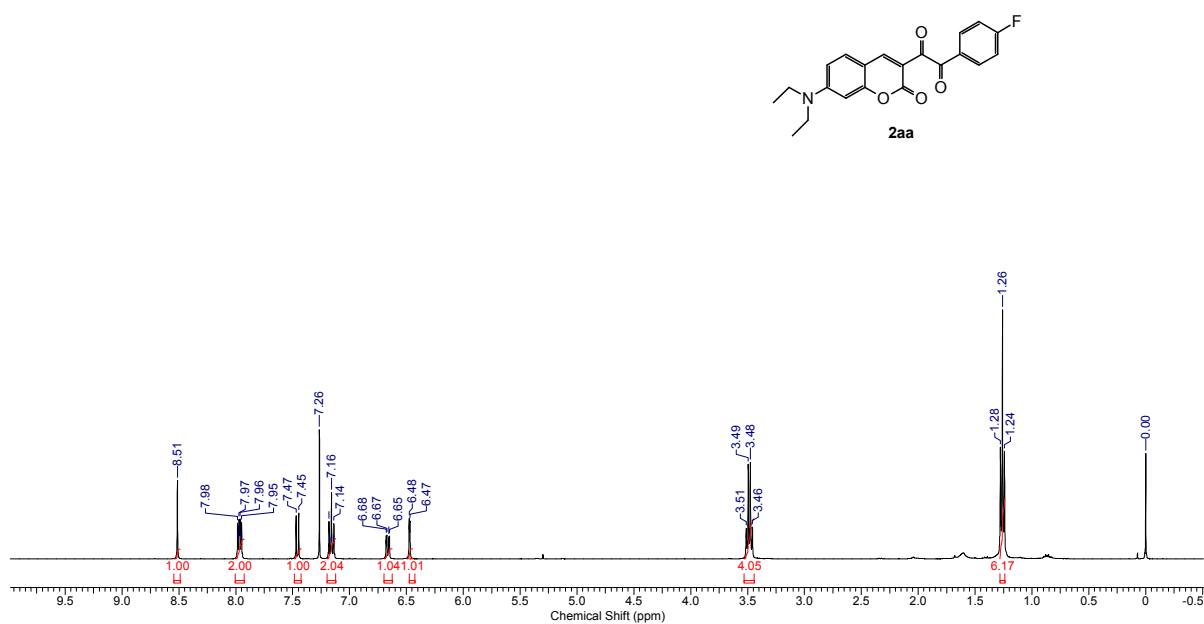Figure S106. <sup>1</sup>H NMR spectrum of compound **2aa**

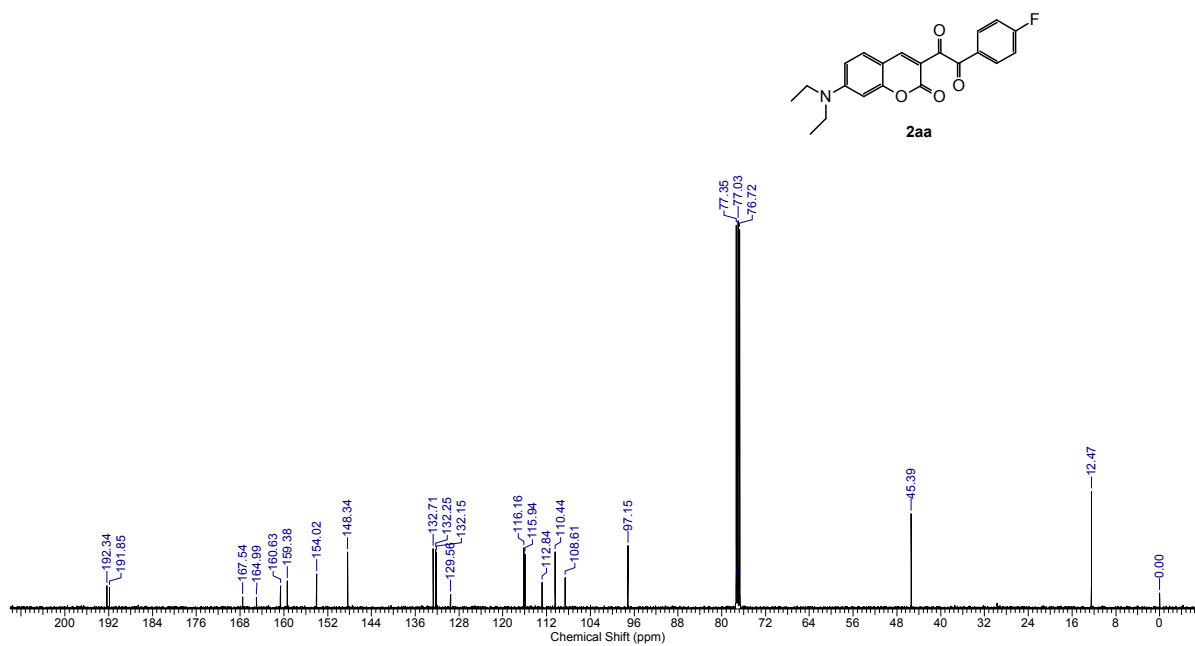

**Figure S107.**  $^{13}\text{C}$  NMR spectrum of compound **2aa**

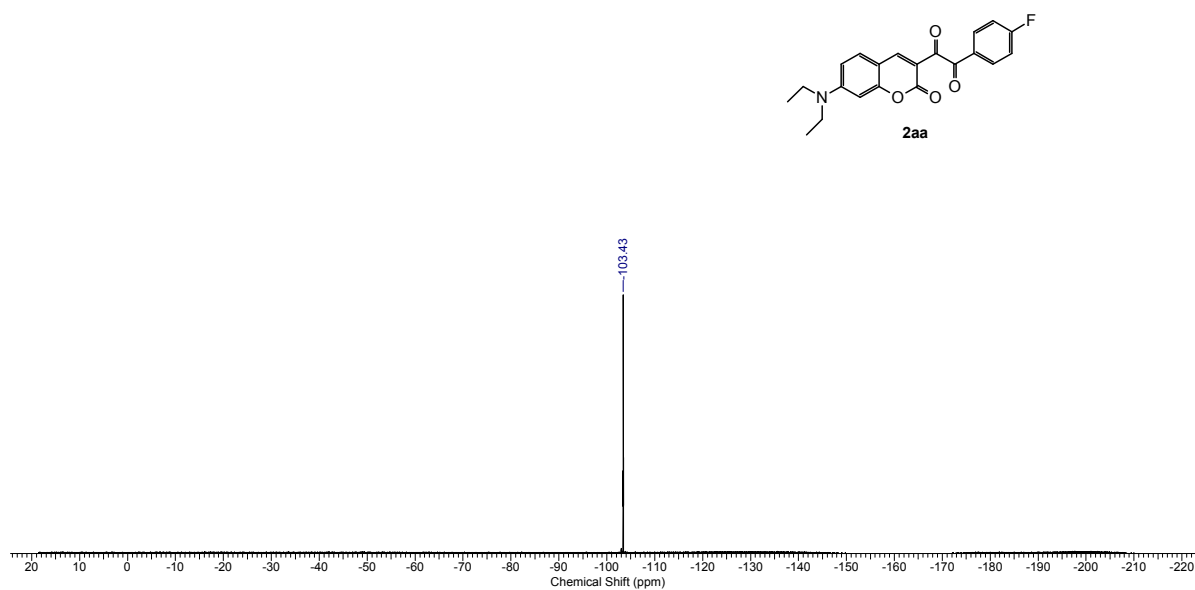

**Figure S108.**  $^{19}\text{F}$  NMR spectrum of compound **2aa**

XJH-217.1H,7010\_000001r

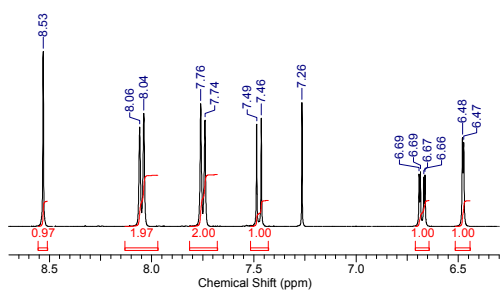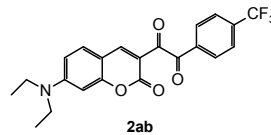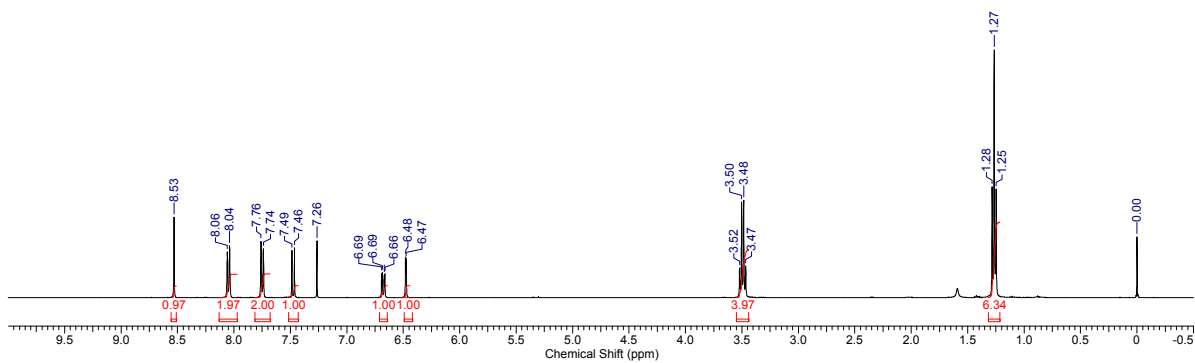

Figure S109. <sup>1</sup>H NMR spectrum of compound **2ab**

XJH-217.13C,7012\_000001r

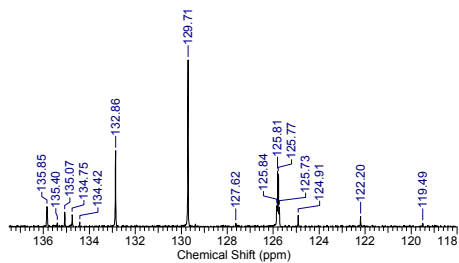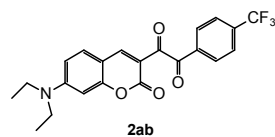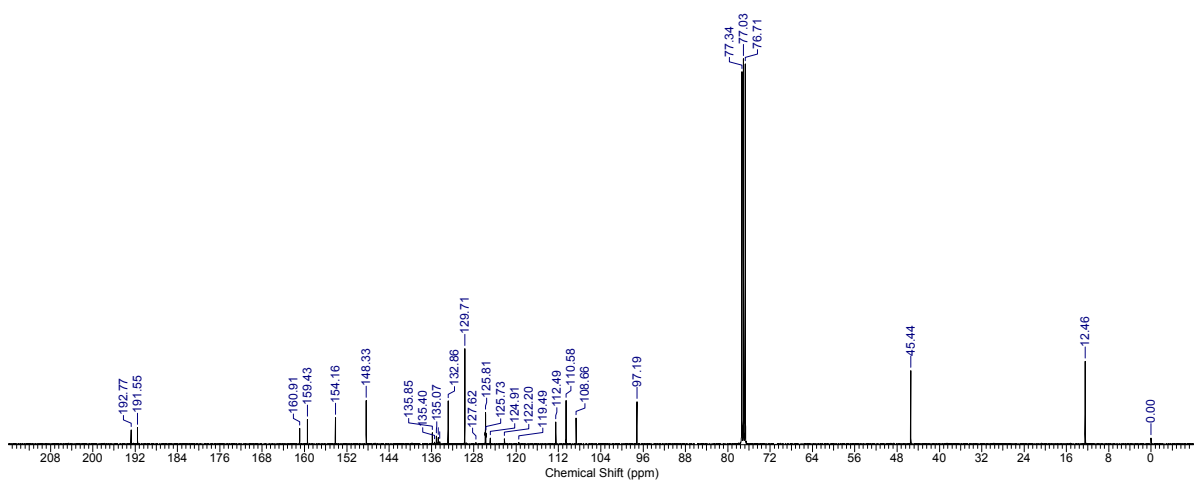

Figure S110. <sup>13</sup>C NMR spectrum of compound **2ab**

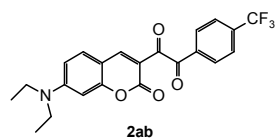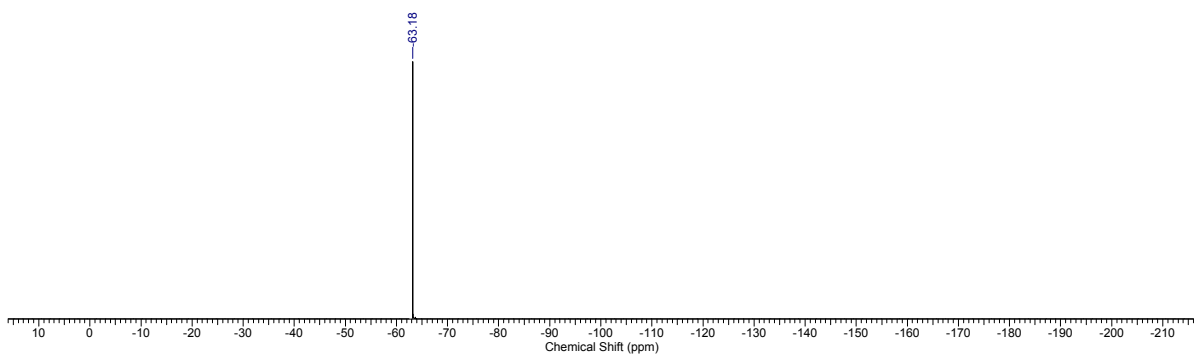

**Figure S111.** <sup>19</sup>F NMR spectrum of compound **2ab**

## 10. X-ray crystallographic data

### 1) Structure determination of **2a**

The structure of **2a** was determined by the X-ray diffraction. Recrystallized from EtOH/dichloromethane (v/v = 1/1). Further information can be found in the CIF file. This crystal was deposited in the Cambridge Crystallographic Data Centre and assigned as CCDC 2036909.

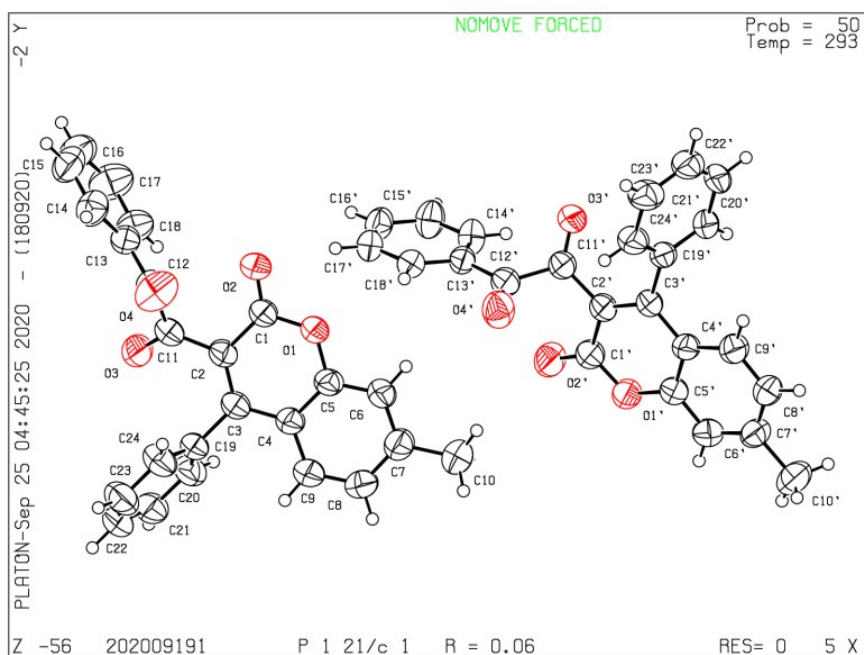

**Table S2 Crystal data and structure refinement for **2a**.**

|                                    |                                                |
|------------------------------------|------------------------------------------------|
| Identification code                | 202009191                                      |
| Empirical formula                  | C <sub>24</sub> H <sub>16</sub> O <sub>4</sub> |
| Formula weight                     | 368.37                                         |
| Temperature/K                      | 293(2)                                         |
| Crystal system                     | monoclinic                                     |
| Space group                        | P2 <sub>1</sub> /c                             |
| a/Å                                | 19.224(2)                                      |
| b/Å                                | 20.020(2)                                      |
| c/Å                                | 10.0058(12)                                    |
| α/°                                | 90                                             |
| β/°                                | 97.418(10)                                     |
| γ/°                                | 90                                             |
| Volume/Å <sup>3</sup>              | 3818.6(8)                                      |
| Z                                  | 8                                              |
| ρ <sub>calc</sub> /cm <sup>3</sup> | 1.281                                          |
| μ/mm <sup>-1</sup>                 | 0.709                                          |

|                                             |                                                               |
|---------------------------------------------|---------------------------------------------------------------|
| F(000)                                      | 1536.0                                                        |
| Crystal size/mm <sup>3</sup>                | 0.18 × 0.14 × 0.07                                            |
| Radiation                                   | CuKα (λ = 1.54184)                                            |
| 2θ range for data collection/°              | 8.834 to 134.3                                                |
| Index ranges                                | -22 ≤ h ≤ 22, -23 ≤ k ≤ 20, -11 ≤ l ≤ 8                       |
| Reflections collected                       | 15425                                                         |
| Independent reflections                     | 6779 [R <sub>int</sub> = 0.0364, R <sub>sigma</sub> = 0.0547] |
| Data/restraints/parameters                  | 6779/0/508                                                    |
| Goodness-of-fit on F <sup>2</sup>           | 1.026                                                         |
| Final R indexes [I ≥ 2σ (I)]                | R <sub>1</sub> = 0.0565, wR <sub>2</sub> = 0.1447             |
| Final R indexes [all data]                  | R <sub>1</sub> = 0.0895, wR <sub>2</sub> = 0.1779             |
| Largest diff. peak/hole / e Å <sup>-3</sup> | 0.20/-0.19                                                    |

## 2) Structure determination of **2g**

The structure of **2g** was determined by the X-ray diffraction. Recrystallized from EtOH/dichloromethane (v/v = 1/1). Further information can be found in the CIF file. This crystal was deposited in the Cambridge Crystallographic Data Centre and assigned as CCDC 2026429.

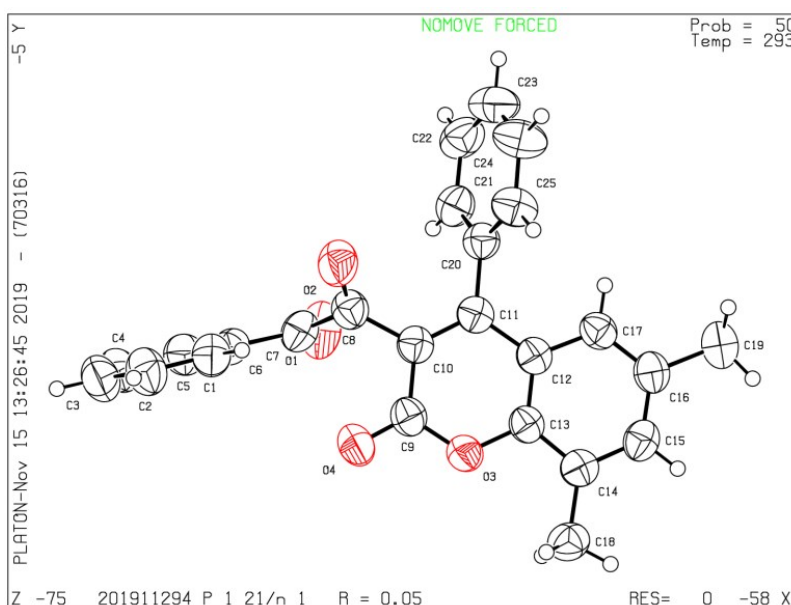

**Table S3 Crystal data and structure refinement for **2g**.**

|                     |                                                |
|---------------------|------------------------------------------------|
| Identification code | 201911294                                      |
| Empirical formula   | C <sub>25</sub> H <sub>18</sub> O <sub>4</sub> |
| Formula weight      | 382.39                                         |
| Temperature/K       | 293(2)                                         |
| Crystal system      | monoclinic                                     |
| Space group         | P2 <sub>1</sub> /n                             |
| a/Å                 | 14.5609(6)                                     |

|                                             |                                                               |
|---------------------------------------------|---------------------------------------------------------------|
| b/Å                                         | 9.3002(4)                                                     |
| c/Å                                         | 14.7714(7)                                                    |
| $\alpha$ /°                                 | 90                                                            |
| $\beta$ /°                                  | 94.995(4)                                                     |
| $\gamma$ /°                                 | 90                                                            |
| Volume/Å <sup>3</sup>                       | 1992.74(15)                                                   |
| Z                                           | 4                                                             |
| $\rho_{\text{calc}}$ /cm <sup>3</sup>       | 1.275                                                         |
| $\mu$ /mm <sup>-1</sup>                     | 0.698                                                         |
| F(000)                                      | 800.0                                                         |
| Crystal size/mm <sup>3</sup>                | 0.22 × 0.15 × 0.1                                             |
| Radiation                                   | CuK $\alpha$ ( $\lambda$ = 1.54184)                           |
| 2 $\Theta$ range for data collection/°      | 8.178 to 134.16                                               |
| Index ranges                                | -17 ≤ h ≤ 16, -8 ≤ k ≤ 11, -17 ≤ l ≤ 16                       |
| Reflections collected                       | 7221                                                          |
| Independent reflections                     | 3554 [R <sub>int</sub> = 0.0250, R <sub>sigma</sub> = 0.0343] |
| Data/restraints/parameters                  | 3554/0/264                                                    |
| Goodness-of-fit on F <sup>2</sup>           | 1.028                                                         |
| Final R indexes [I ≥ 2 $\sigma$ (I)]        | R <sub>1</sub> = 0.0477, wR <sub>2</sub> = 0.1199             |
| Final R indexes [all data]                  | R <sub>1</sub> = 0.0667, wR <sub>2</sub> = 0.1383             |
| Largest diff. peak/hole / e Å <sup>-3</sup> | 0.13/-0.17                                                    |

### 3) Structure determination of **2s**

The structure of **2s** was determined by the X-ray diffraction. Recrystallized from EtOH/dichloromethane (v/v= 1/1). Further information can be found in the CIF file. This crystal was deposited in the Cambridge Crystallographic Data Centre and assigned as CCDC 2036910.

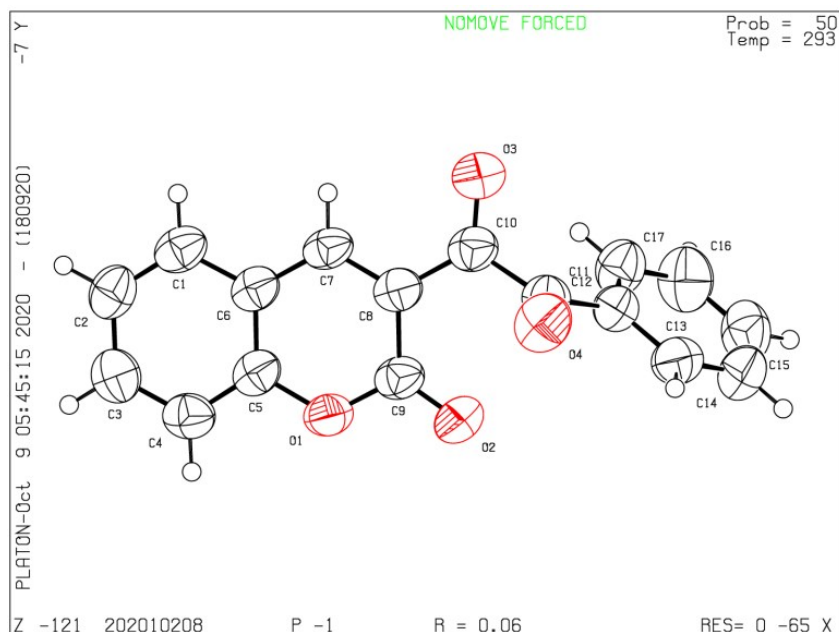

**Table S4** rystal data and structure refinement for **2s**.

|                                    |                                                               |
|------------------------------------|---------------------------------------------------------------|
| Identification code                | 202010208                                                     |
| Empirical formula                  | C <sub>17</sub> H <sub>10</sub> O <sub>4</sub>                |
| Formula weight                     | 278.25                                                        |
| Temperature/K                      | 293(2)                                                        |
| Crystal system                     | triclinic                                                     |
| Space group                        | P-1                                                           |
| a/Å                                | 7.1288(11)                                                    |
| b/Å                                | 7.3017(9)                                                     |
| c/Å                                | 13.738(2)                                                     |
| α/°                                | 94.814(11)                                                    |
| β/°                                | 90.307(13)                                                    |
| γ/°                                | 112.254(14)                                                   |
| Volume/Å <sup>3</sup>              | 658.95(18)                                                    |
| Z                                  | 2                                                             |
| ρ <sub>calc</sub> /cm <sup>3</sup> | 1.402                                                         |
| μ/mm <sup>-1</sup>                 | 0.835                                                         |
| F(000)                             | 288.0                                                         |
| Crystal size/mm <sup>3</sup>       | 0.22 × 0.1 × 0.04                                             |
| Radiation                          | CuKα (λ = 1.54184)                                            |
| 2θ range for data collection/°     | 12.944 to 134.118                                             |
| Index ranges                       | -8 ≤ h ≤ 5, -7 ≤ k ≤ 8, -16 ≤ l ≤ 16                          |
| Reflections collected              | 4663                                                          |
| Independent reflections            | 2352 [R <sub>int</sub> = 0.0339, R <sub>sigma</sub> = 0.0441] |



|                                                |                                  |
|------------------------------------------------|----------------------------------|
| Data/restraints/parameters                     | 2352/0/190                       |
| Goodness-of-fit on $F^2$                       | 1.035                            |
| Final R indexes [ $I \geq 2\sigma(I)$ ]        | $R_1 = 0.0638$ , $wR_2 = 0.1804$ |
| Final R indexes [all data]                     | $R_1 = 0.0994$ , $wR_2 = 0.2205$ |
| Largest diff. peak/hole / $e \text{ \AA}^{-3}$ | 0.22/-0.16                       |

---
